# Supplementary material for: Application of the Phylogenetic Species Concept to Wallemia sebi from House Dust and Indoor Air Revealed by Multi-Locus Genealogical Concordance
Source: PubMed Central journal article supplement (PMC4370657; doi:10.1371/journal.pone.0120894), 2015-03-23
Supplement: pone.0120894.s005.pdf [file pone.0120894.s005.pdf]

# ITS neighbour joining

*W. muriae*

*W. sebi* clade 1

*W. sebi* clade 2

*W. sebi* clade 3

*W. sebi* clade 4

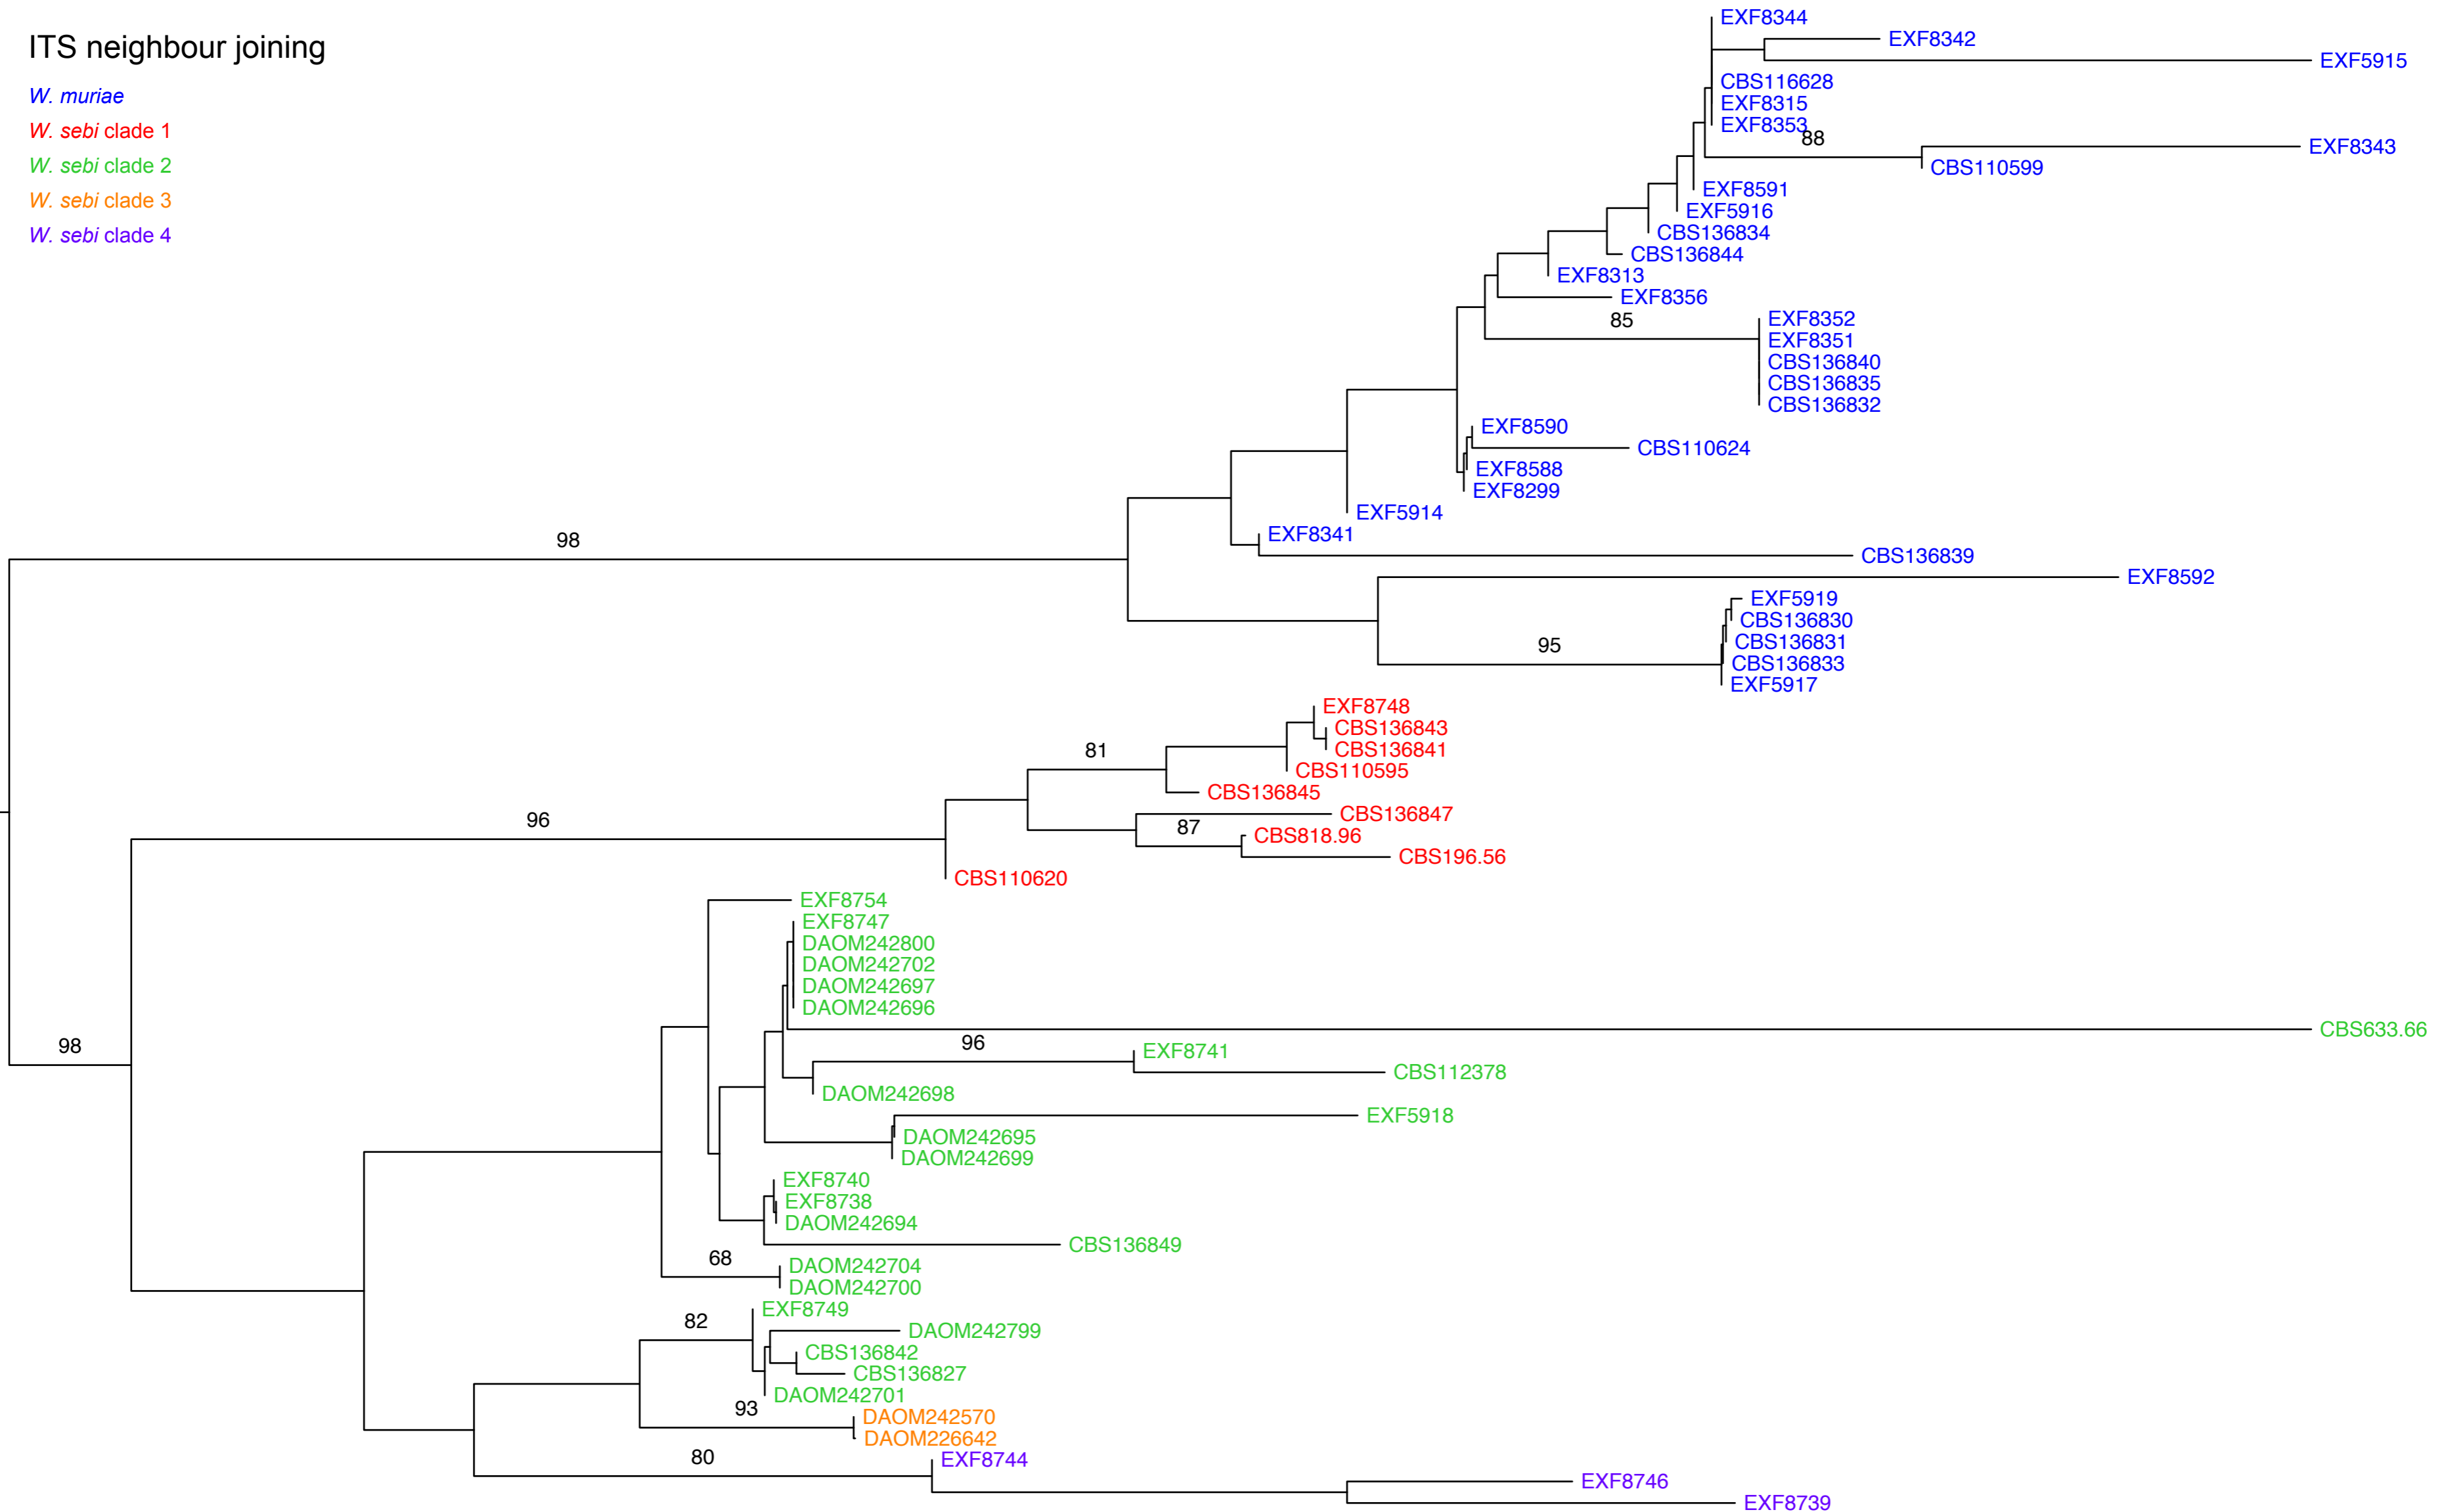

0.0050

# MCM7 neighbour joining

- W. muriae*
- W. sebi* clade 1
- W. sebi* clade 2
- W. sebi* clade 3
- W. sebi* clade 4

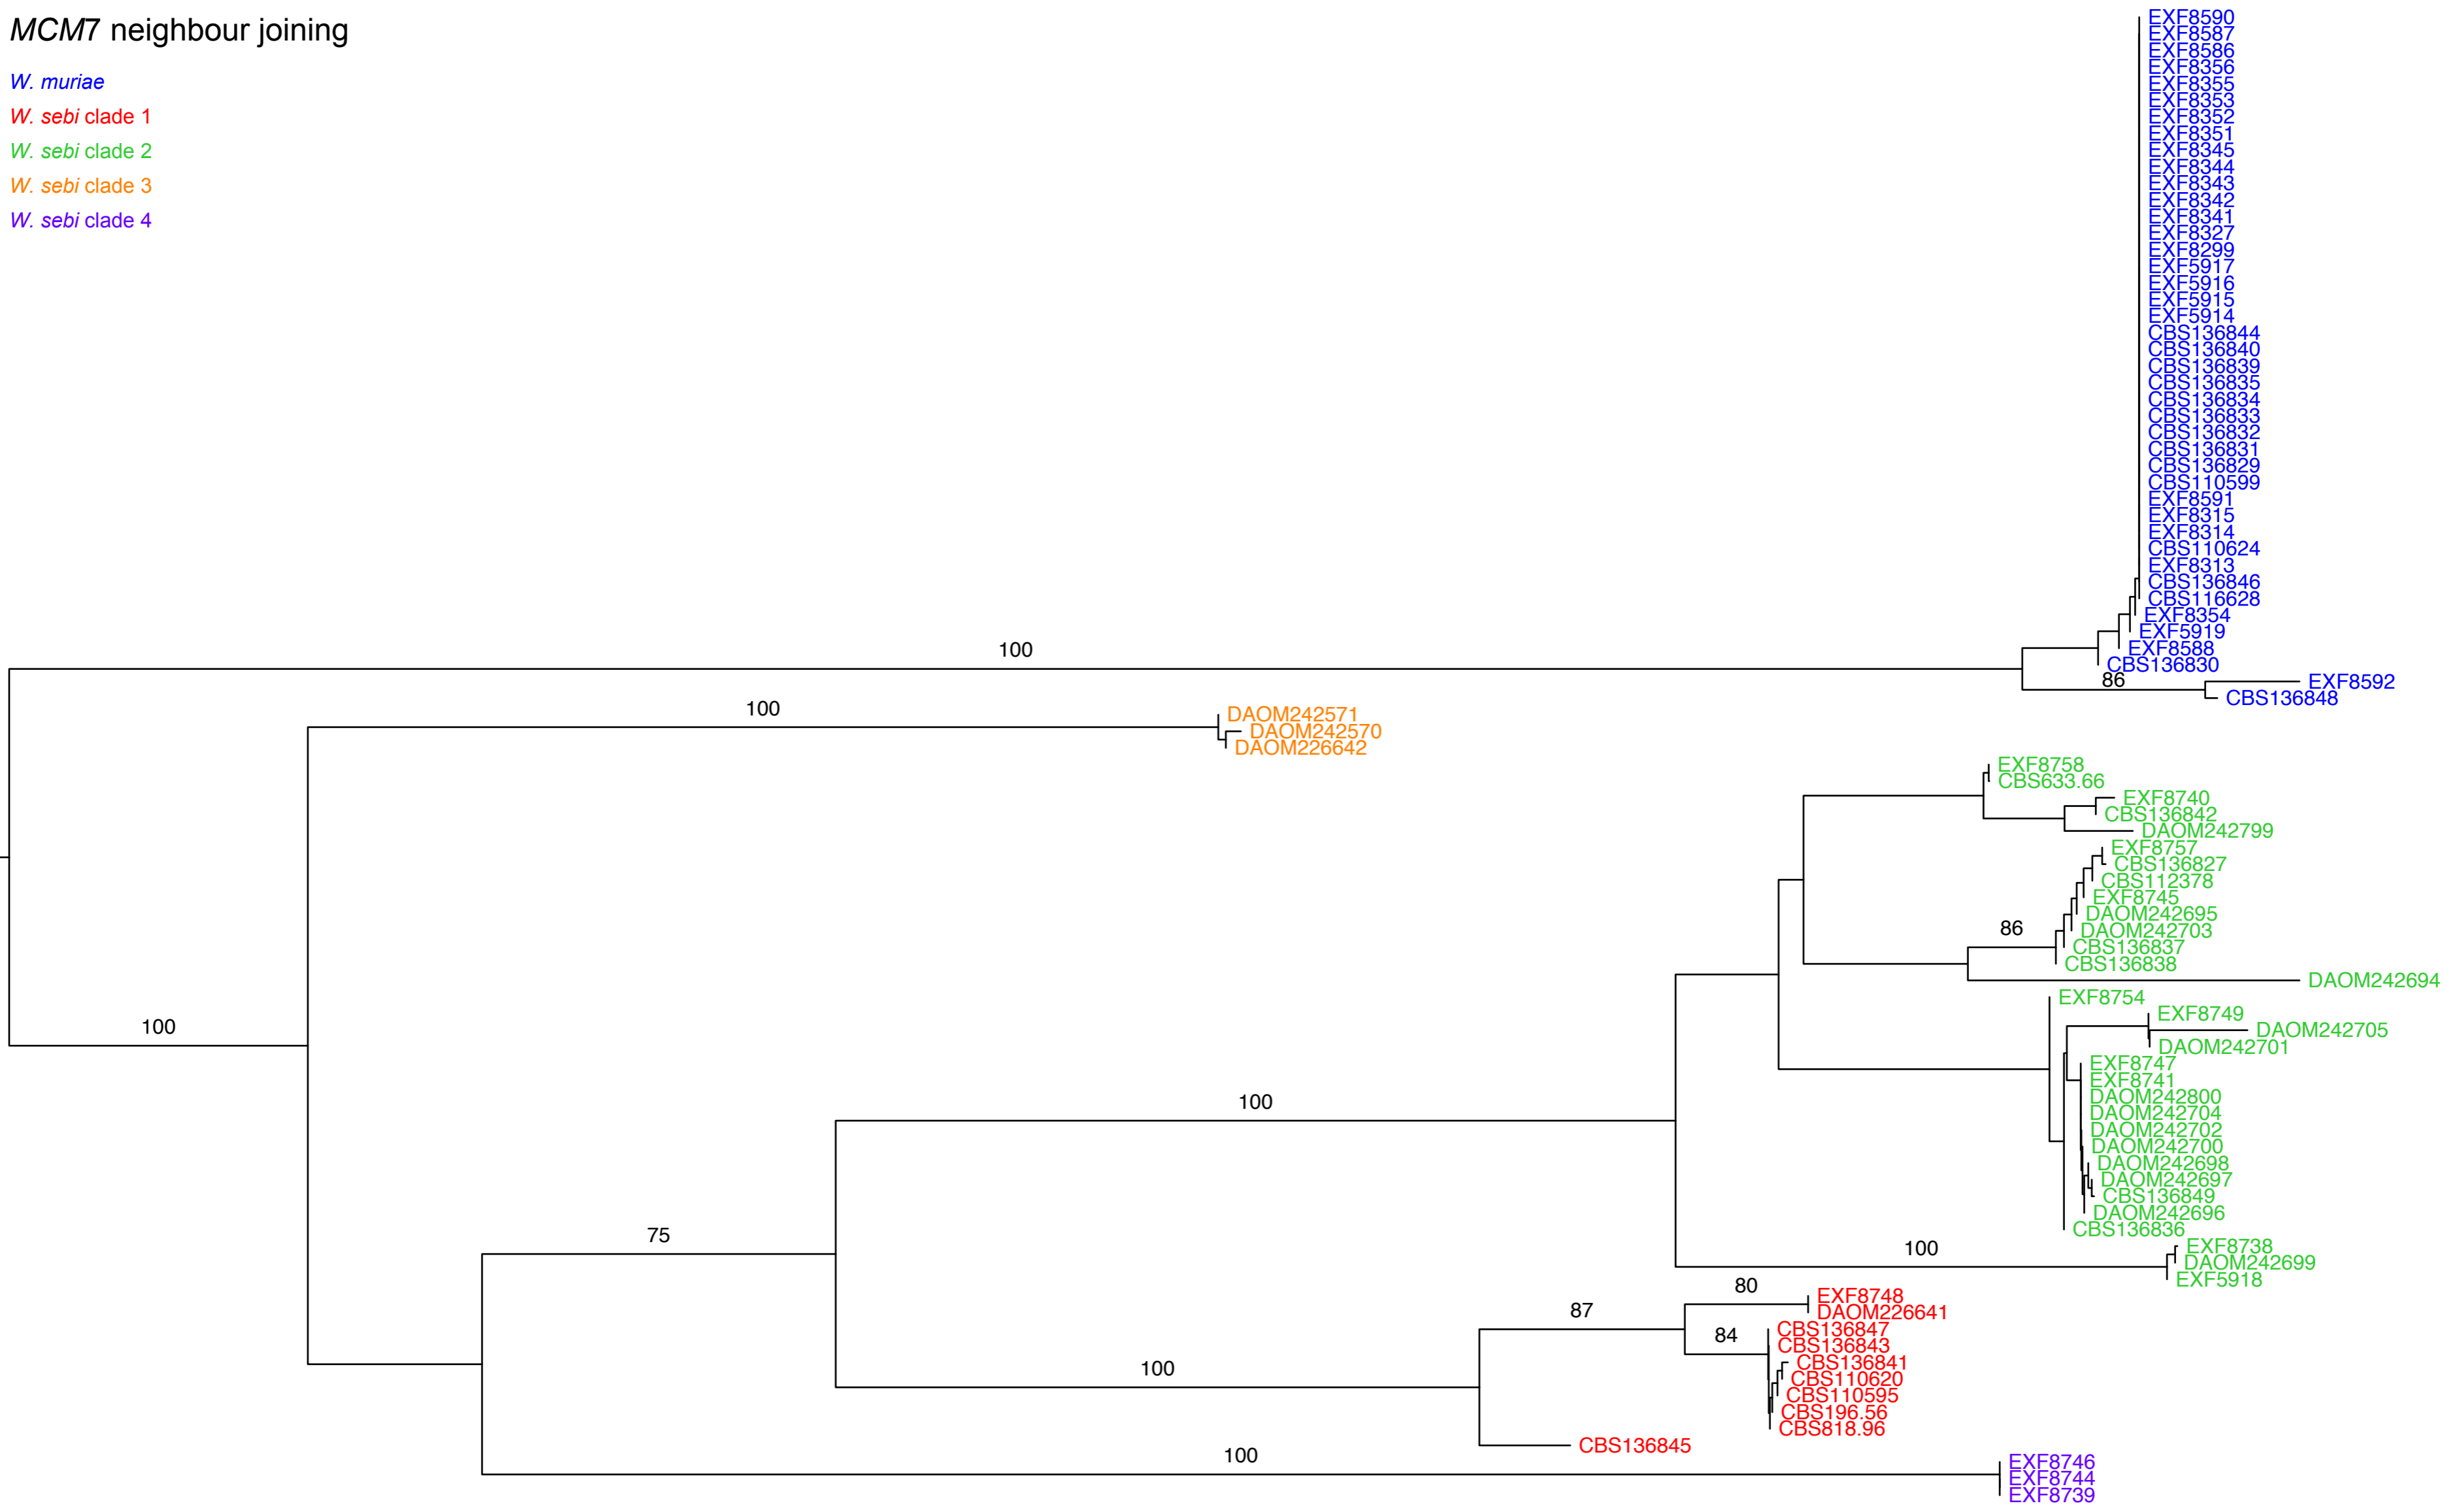

0.0080

# RPB1 neighbour joining

*W. muriae*

*W. sebi* clade 1

*W. sebi* clade 2

*W. sebi* clade 3

*W. sebi* clade 4

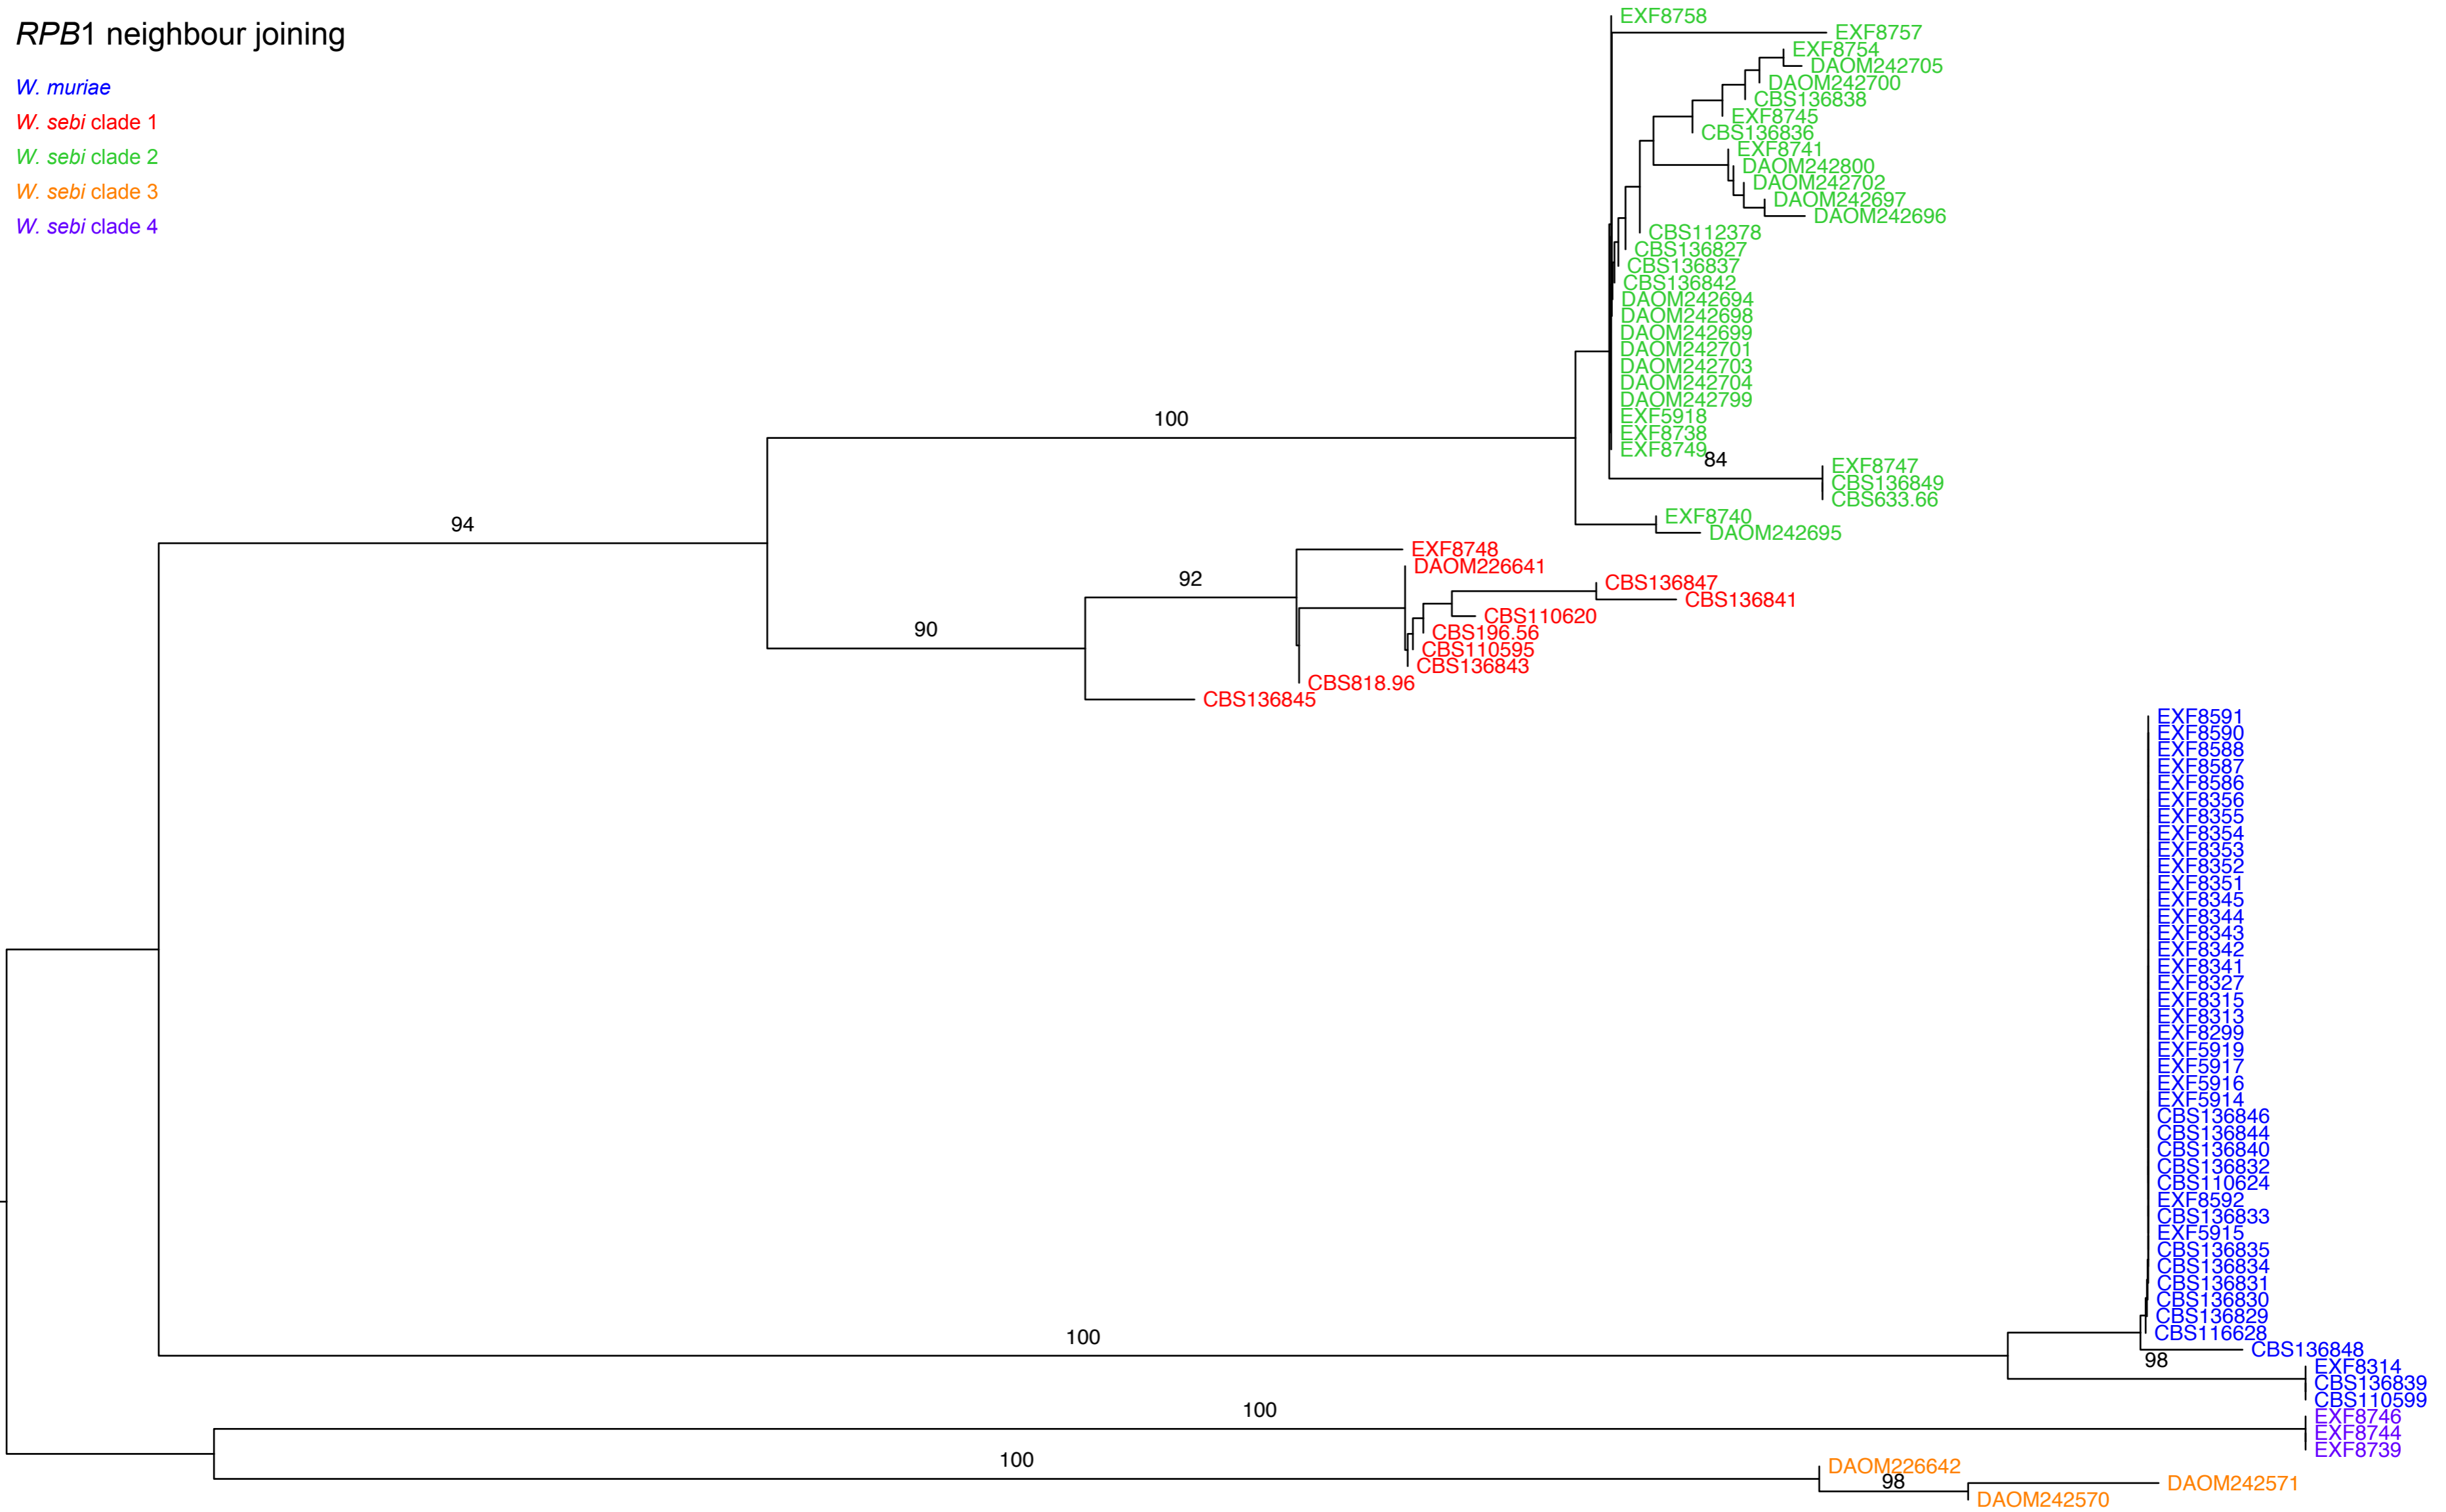

0.0070

# RPB2 neighbour joining

*W. muriae*

*W. sebi* clade 1

*W. sebi* clade 2

*W. sebi* clade 3

*W. sebi* clade 4

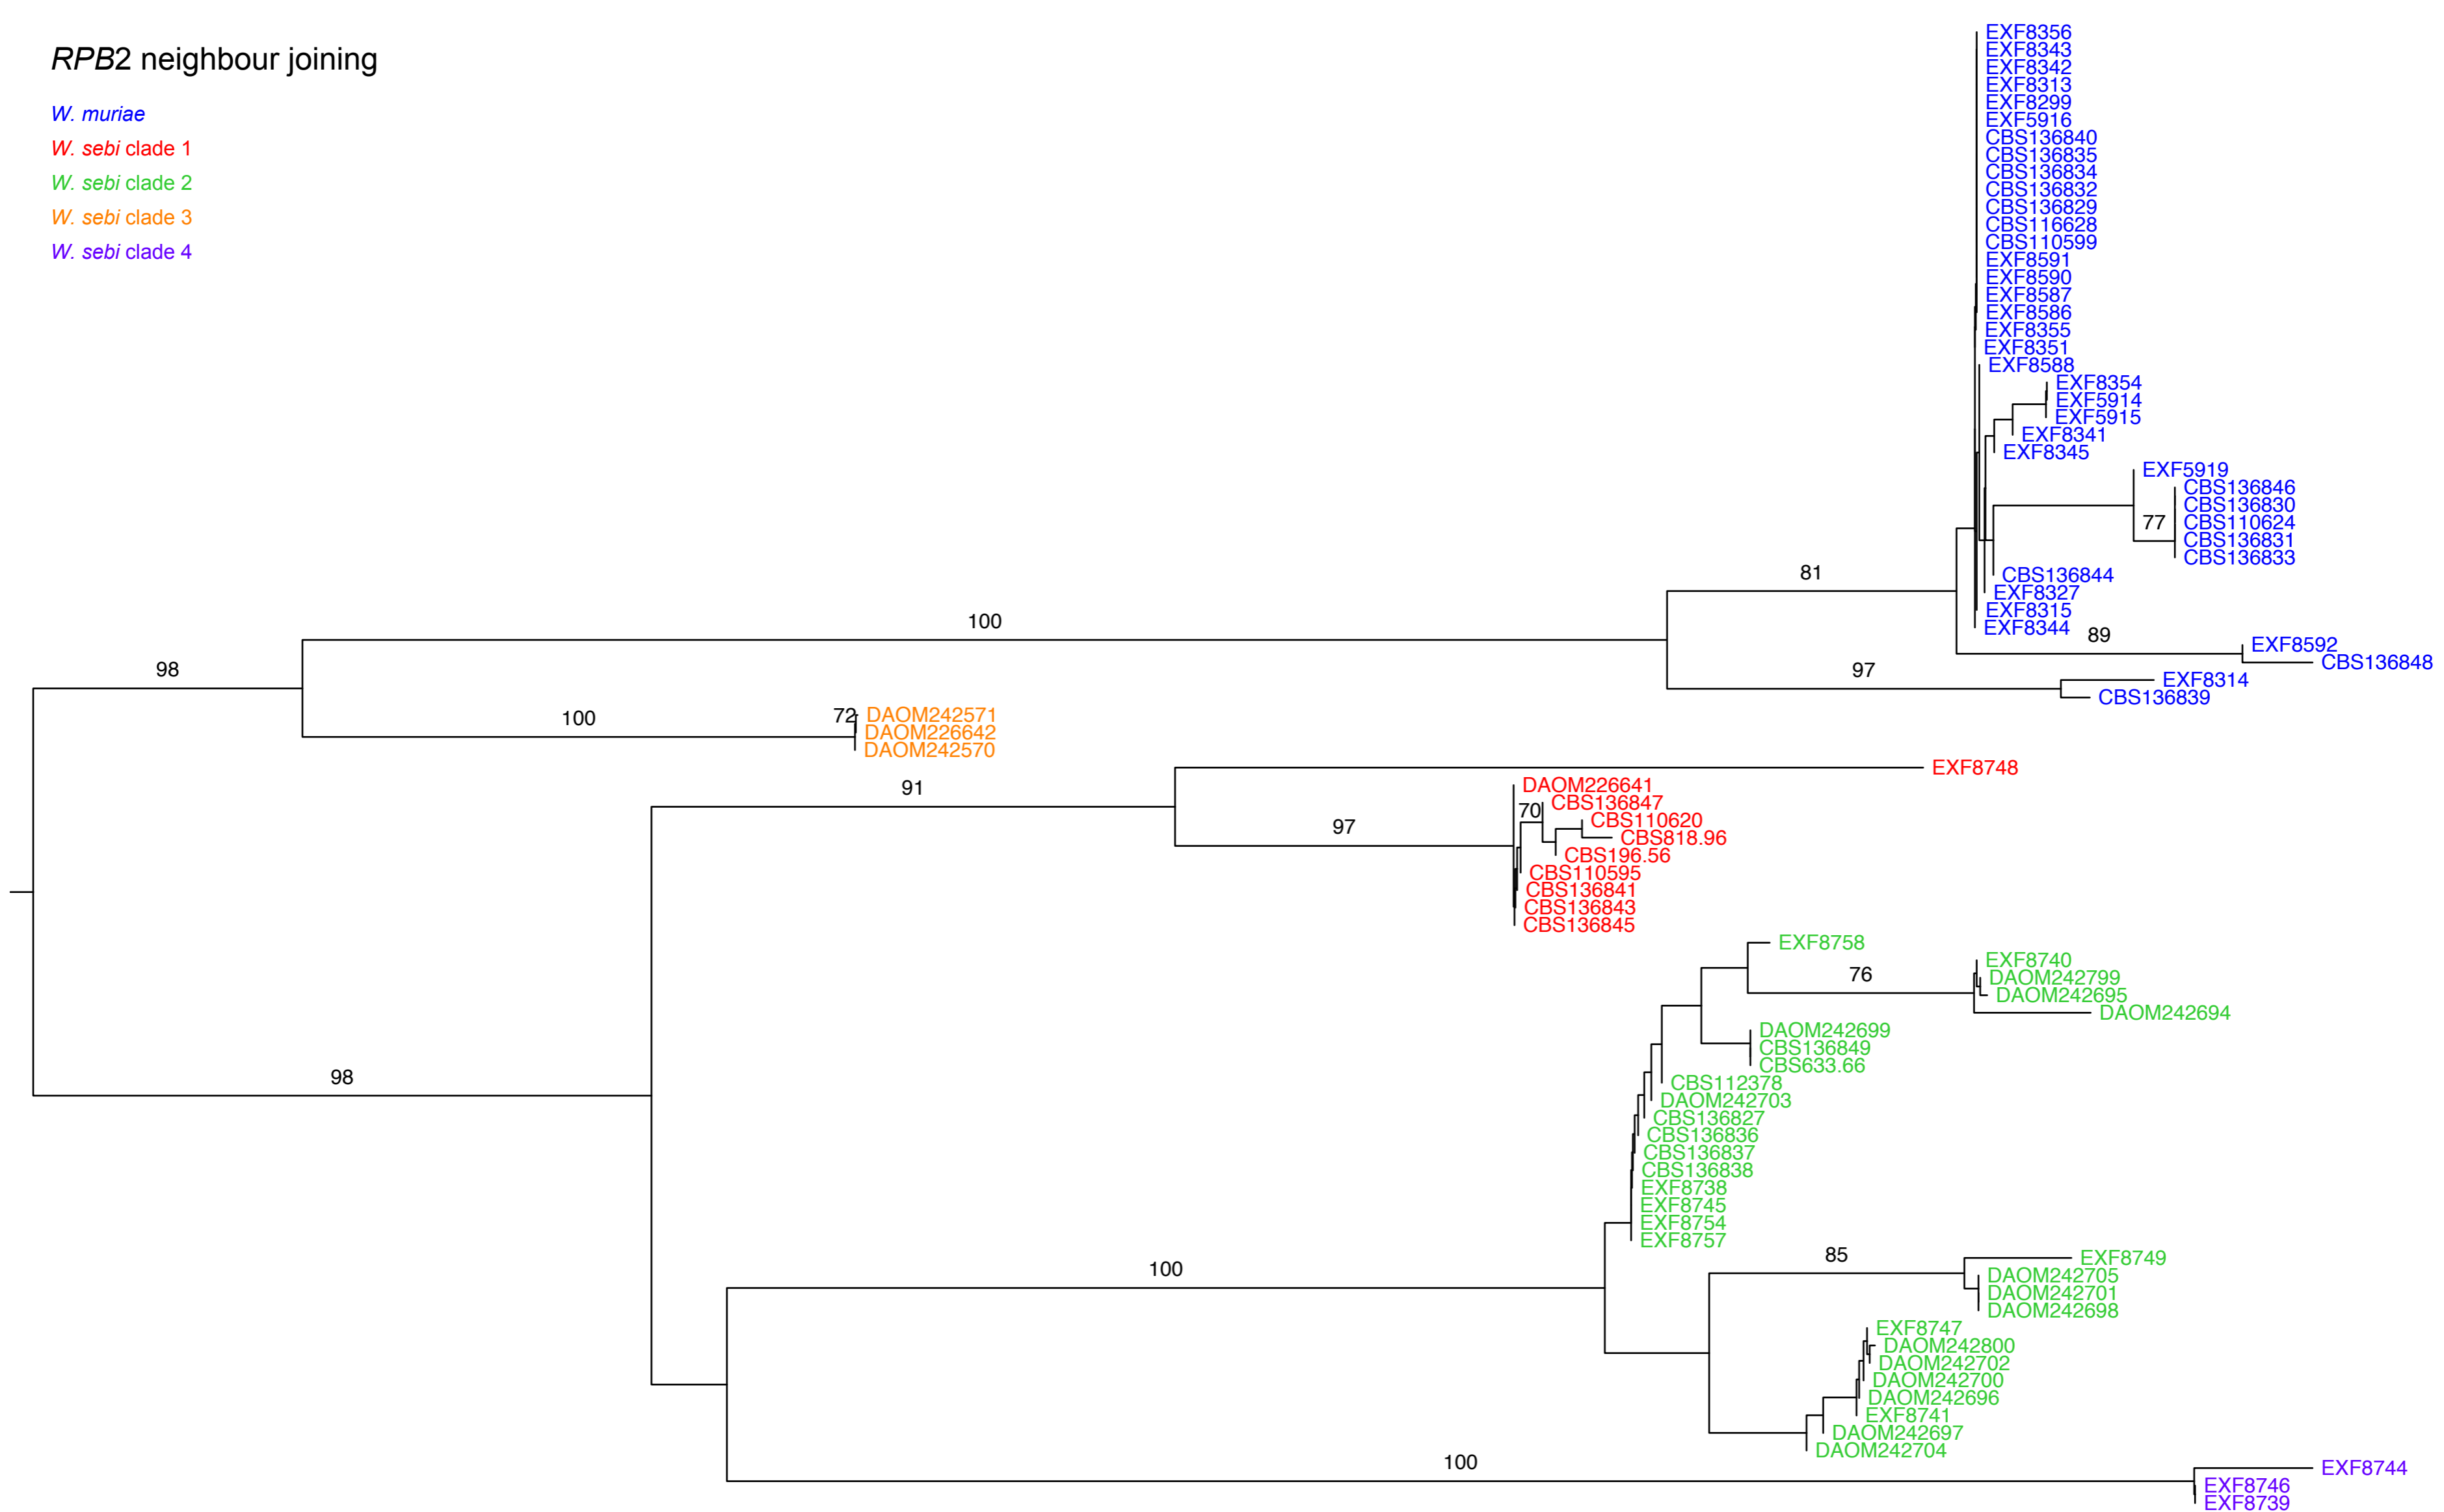

0.0030

# TSR1 neighbour joining

*W. muriae*

*W. sebi* clade 1

*W. sebi* clade 2

*W. sebi* clade 3

*W. sebi* clade 4

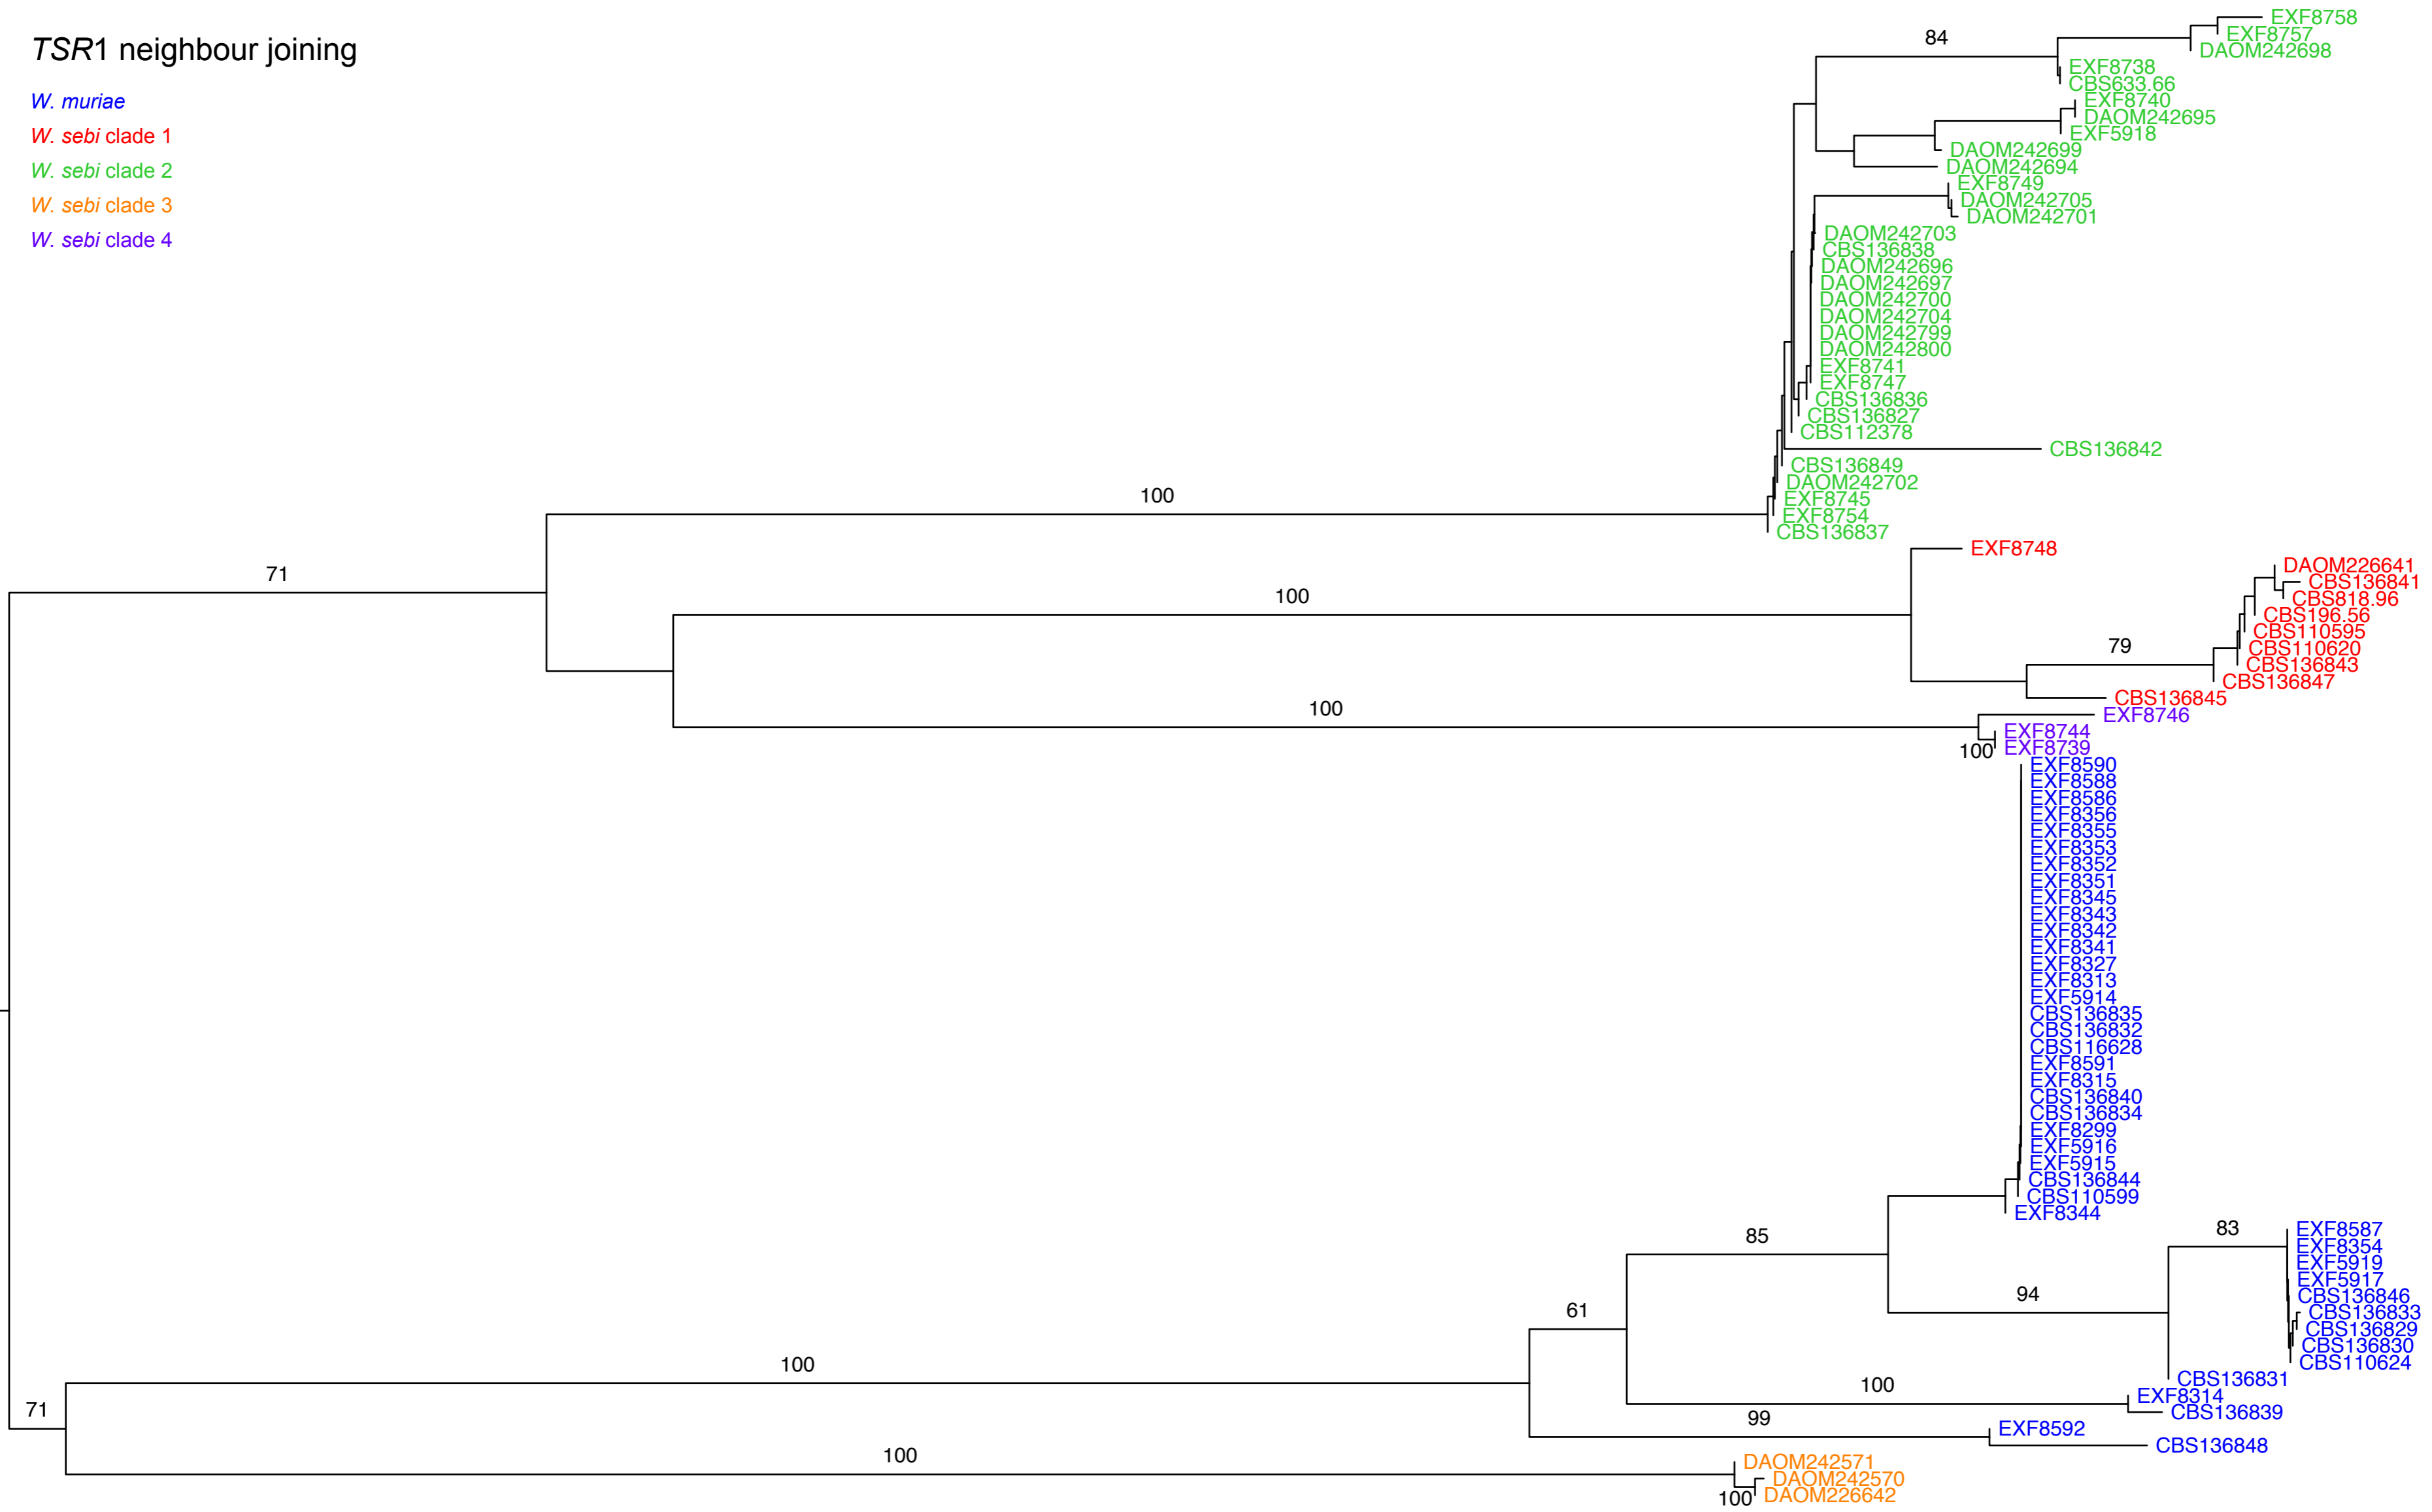

0.0030

# ITS strict parsimony

*W. muriae*

*W. sebi* clade 1

*W. sebi* clade 2

*W. sebi* clade 3

*W. sebi* clade 4

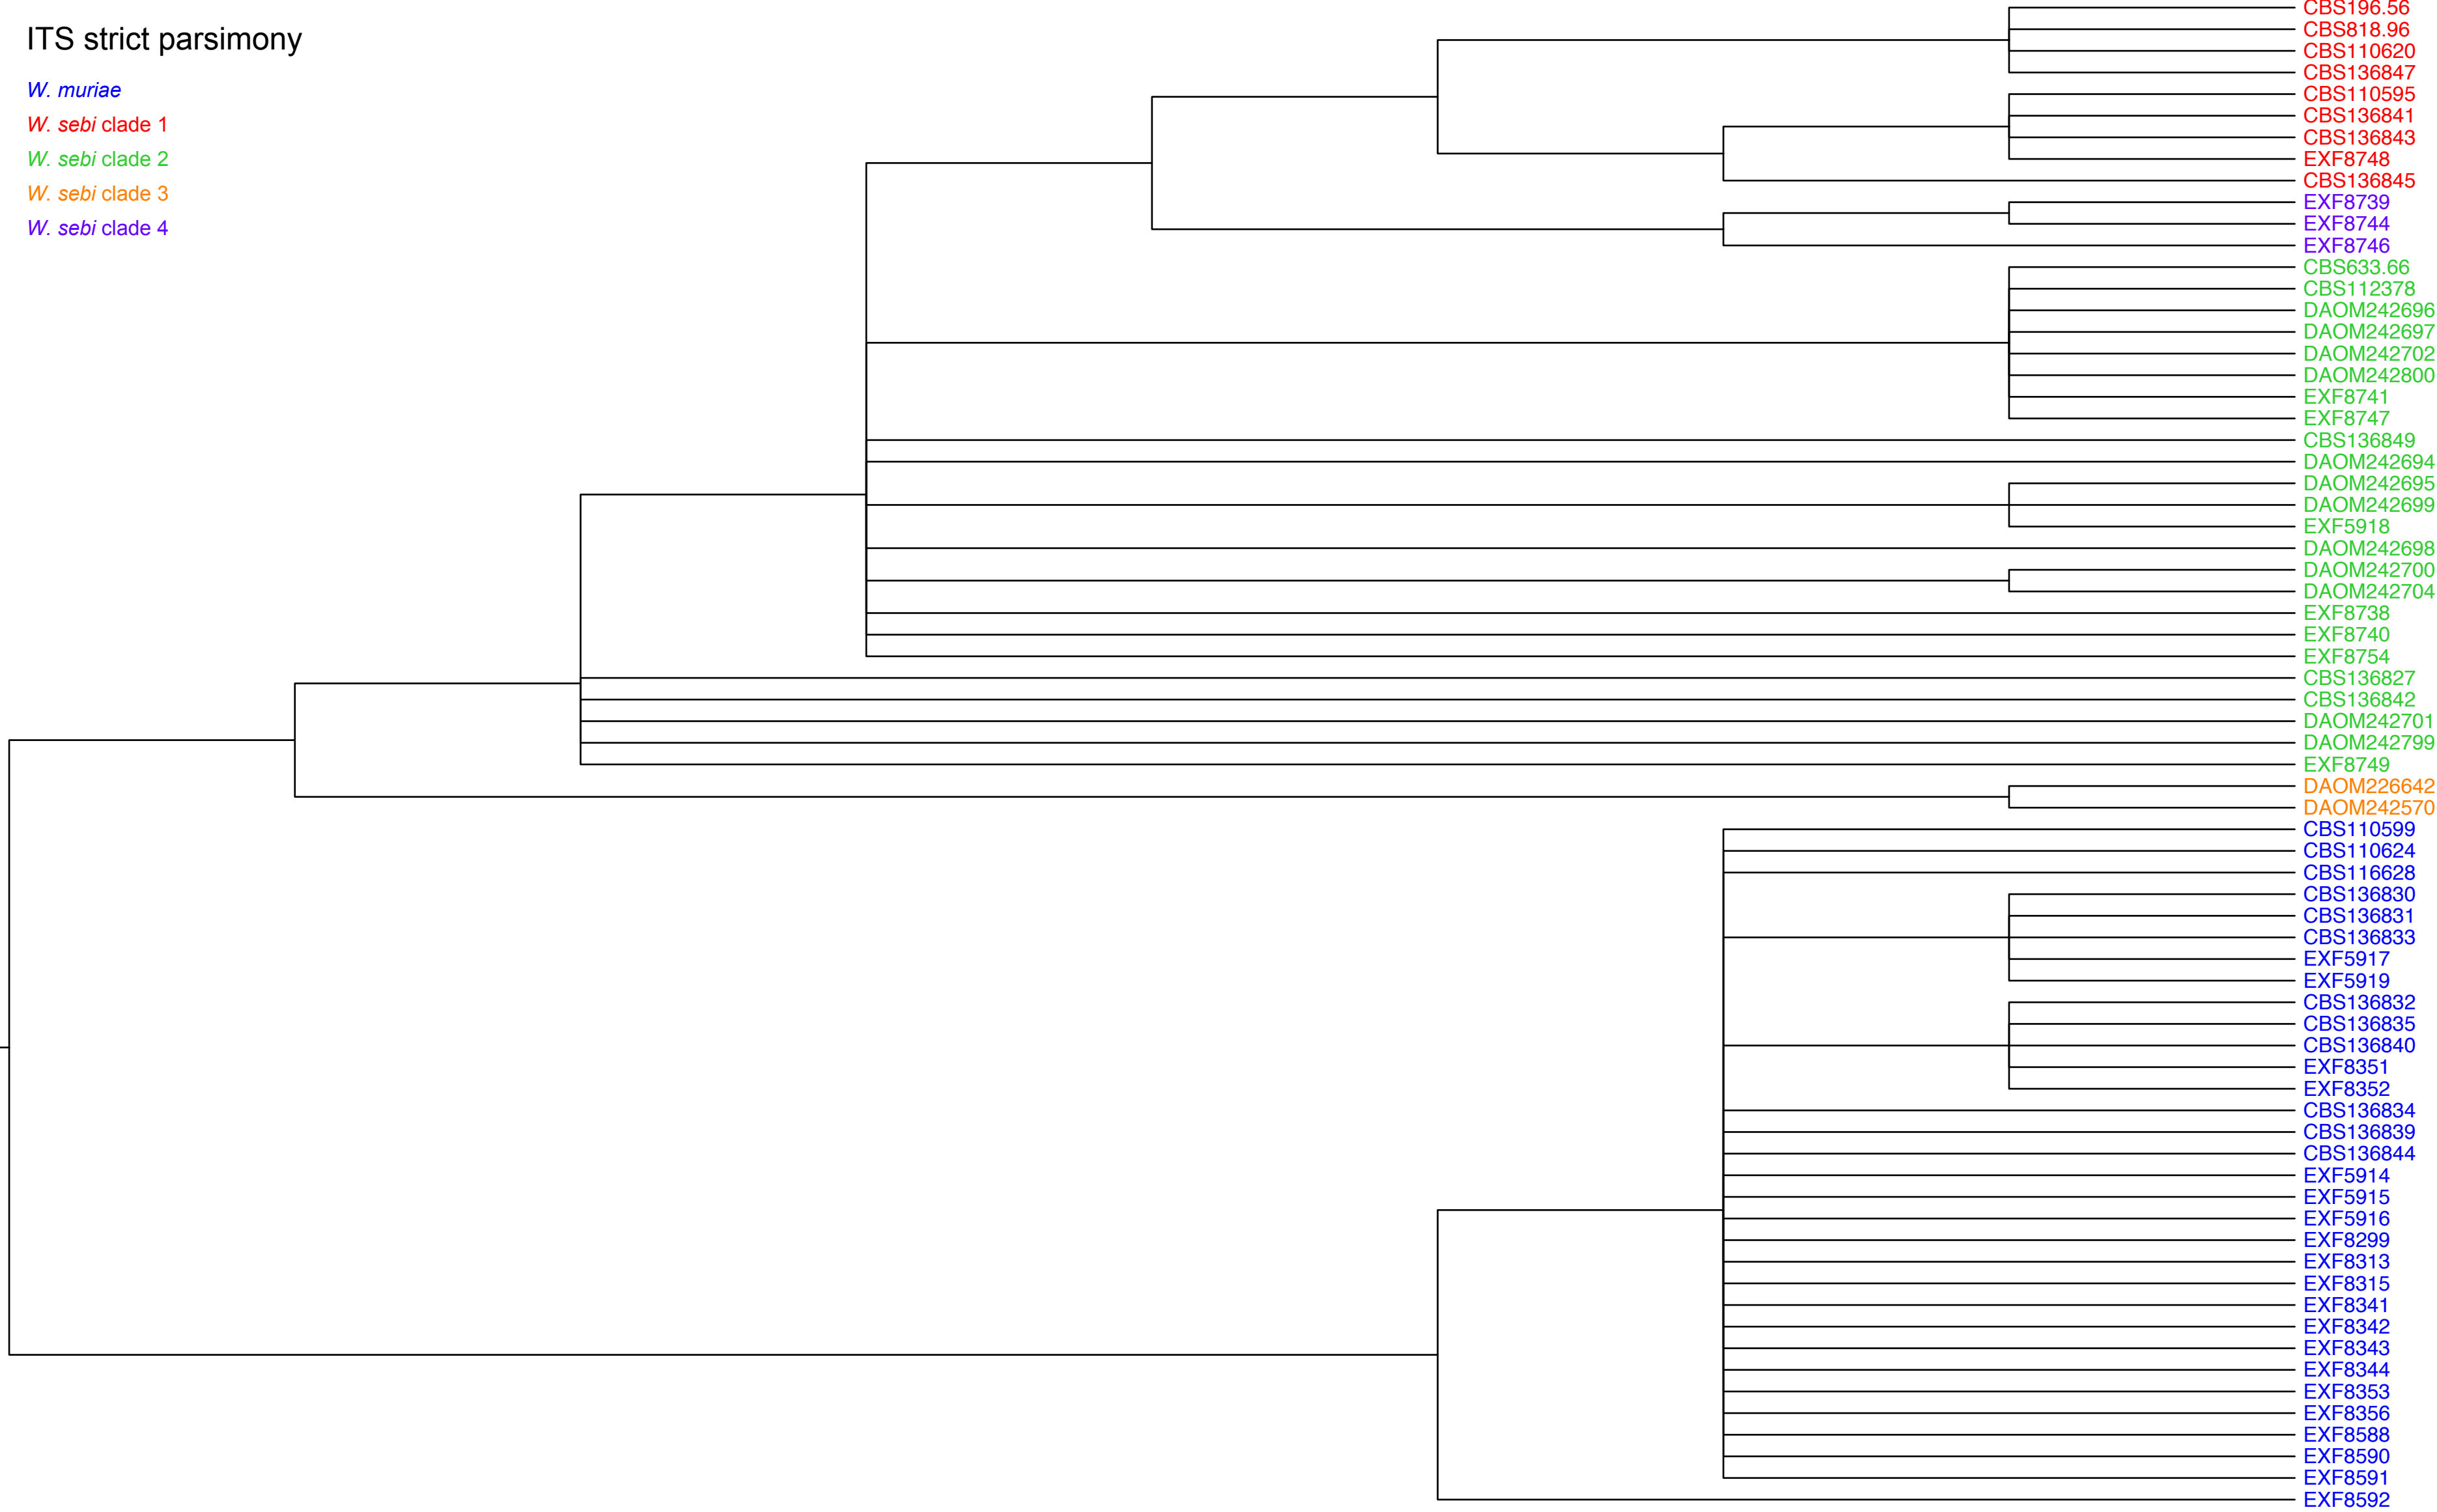

# MCM7 strict parsimony

*W. muriae*

*W. sebi* clade 1

*W. sebi* clade 2

*W. sebi* clade 3

*W. sebi* clade 4

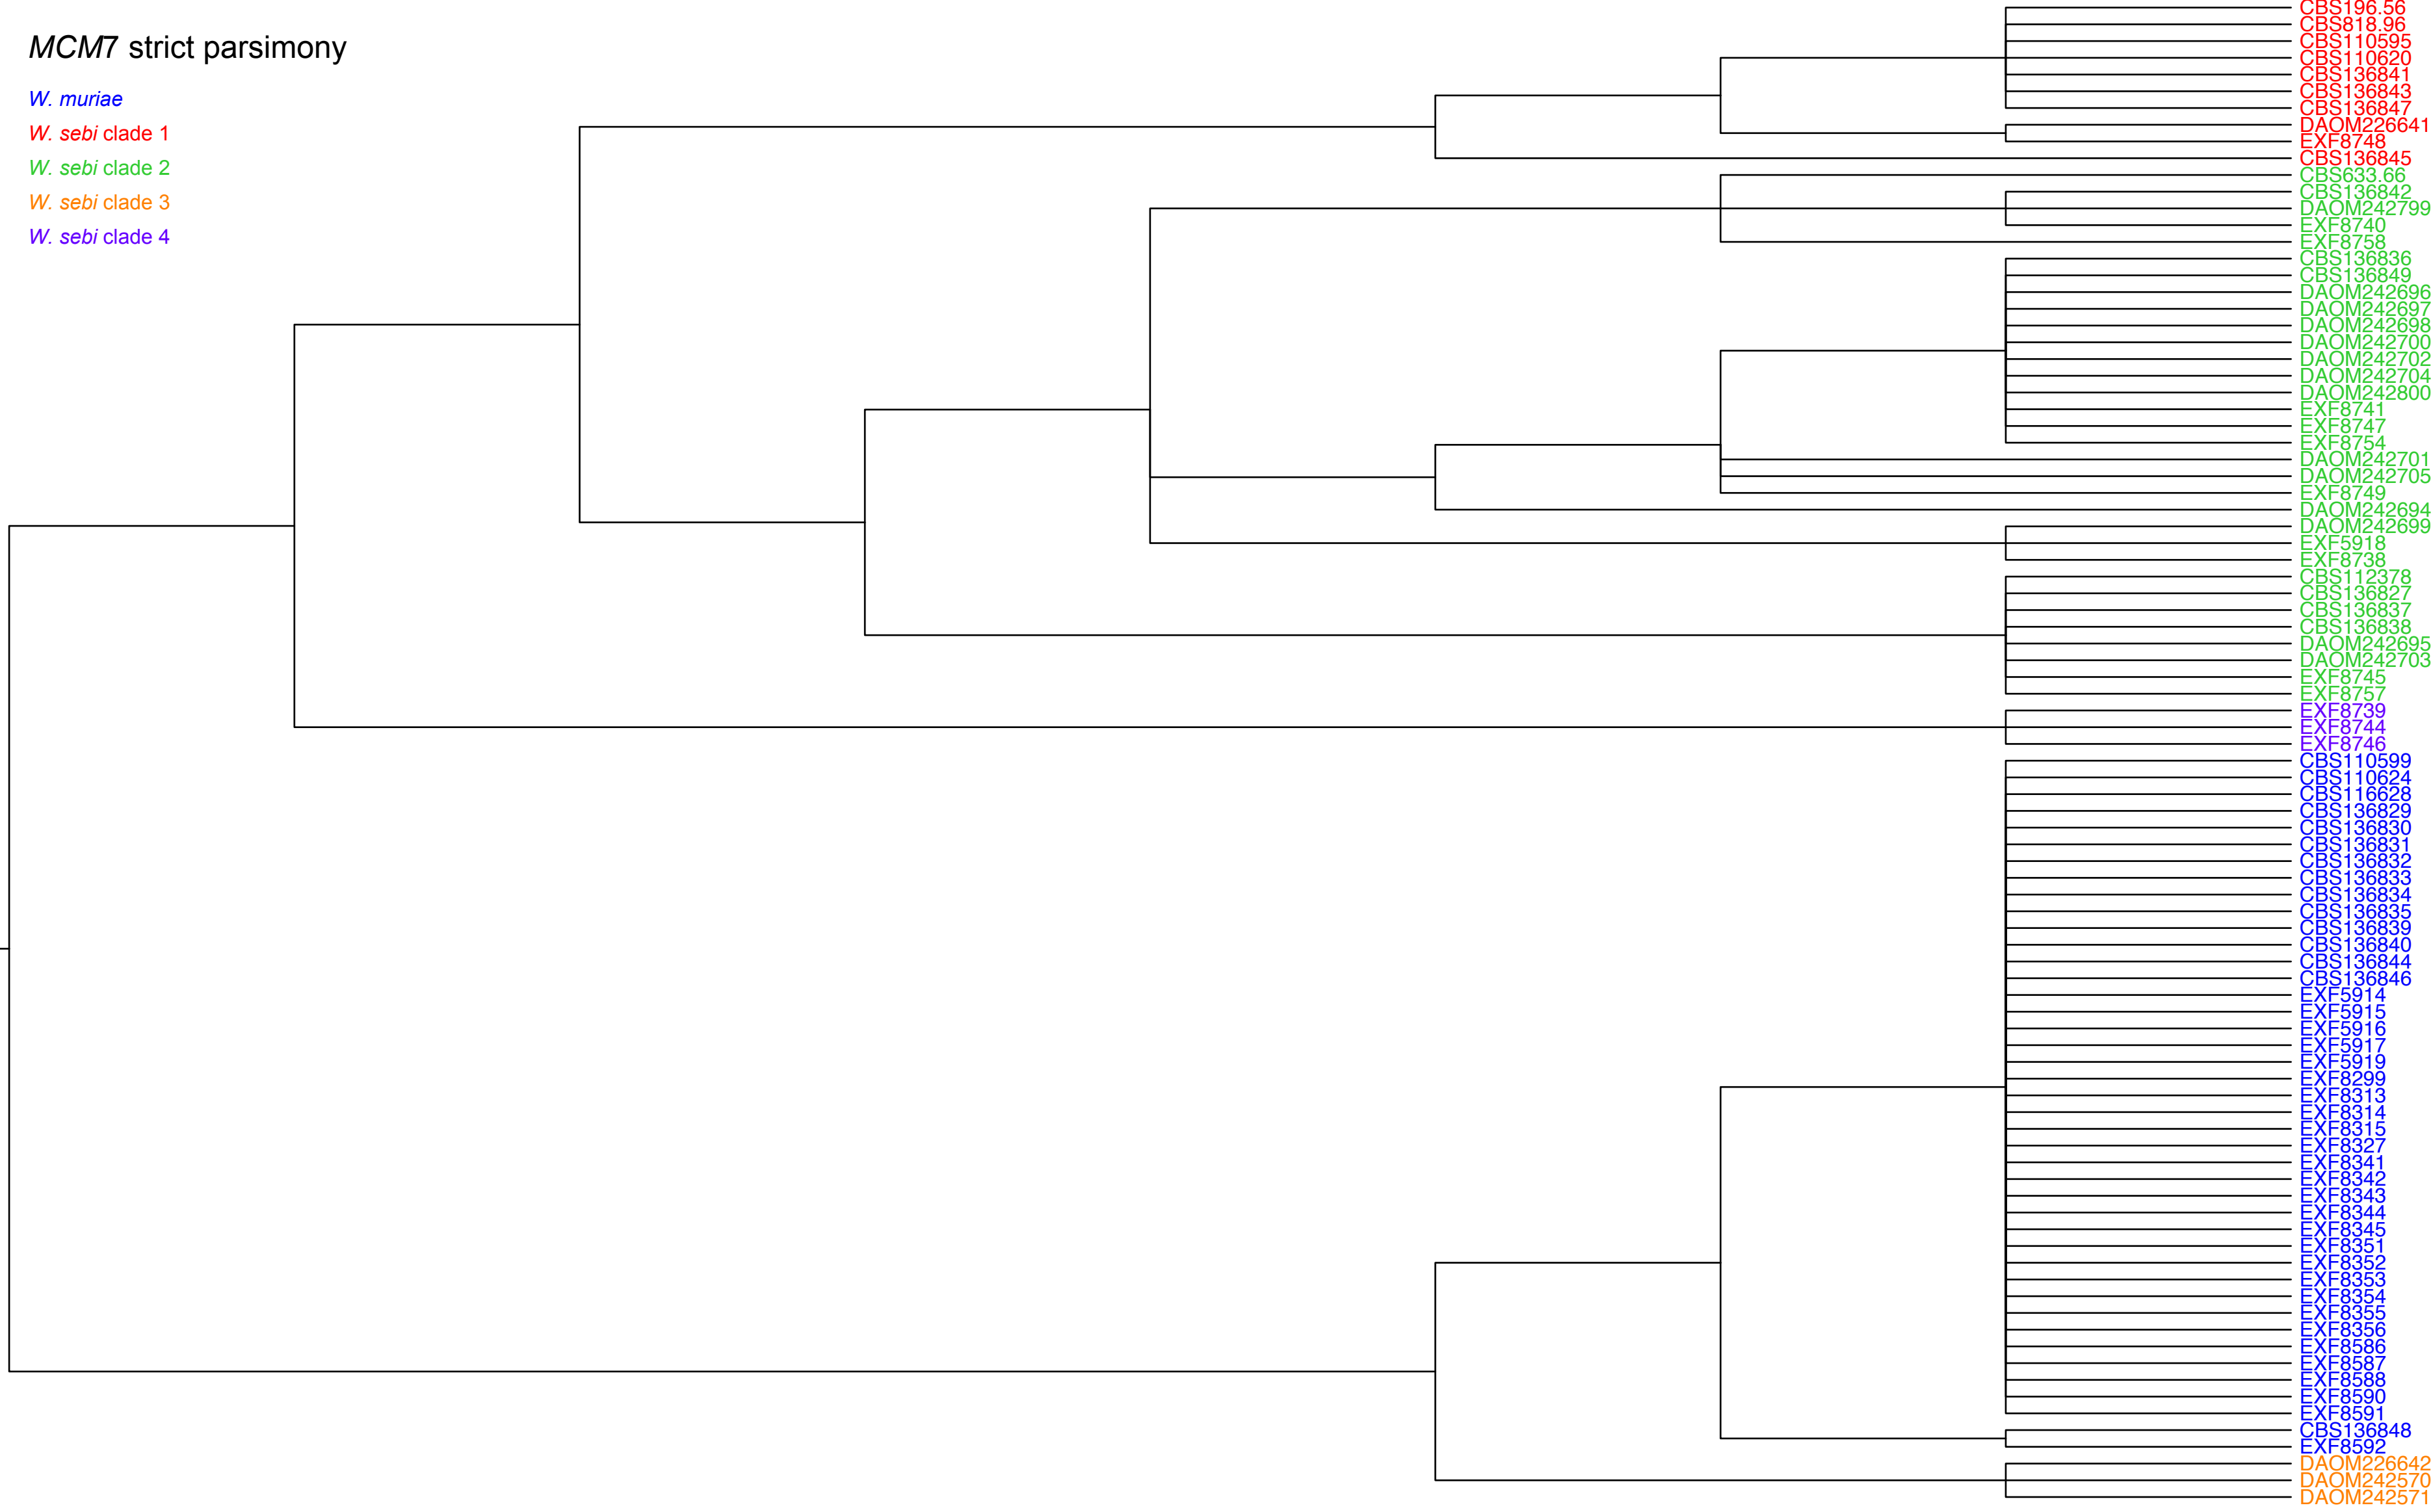

- CBS196.56
- CBS818.96
- CBS110595
- CBS110620
- CBS136841
- CBS136843
- CBS136847
- DAOM226641
- EXF8748
- CBS136845
- CBS633.66
- CBS136842
- DAOM242799
- EXF8740
- EXF8758
- CBS136836
- CBS136849
- DAOM242696
- DAOM242697
- DAOM242698
- DAOM242700
- DAOM242702
- DAOM242704
- DAOM242800
- EXF8741
- EXF8747
- EXF8754
- DAOM242701
- DAOM242705
- EXF8749
- DAOM242694
- DAOM242699
- EXF5918
- EXF8738
- CBS112378
- CBS136827
- CBS136837
- CBS136838
- DAOM242695
- DAOM242703
- EXF8745
- EXF8757
- EXF8739
- EXF8744
- EXF8746
- CBS110599
- CBS110624
- CBS116628
- CBS136829
- CBS136830
- CBS136831
- CBS136832
- CBS136833
- CBS136834
- CBS136835
- CBS136839
- CBS136840
- CBS136844
- CBS136846
- EXF5914
- EXF5915
- EXF5916
- EXF5917
- EXF5919
- EXF8299
- EXF8313
- EXF8314
- EXF8315
- EXF8327
- EXF8341
- EXF8342
- EXF8343
- EXF8344
- EXF8345
- EXF8351
- EXF8352
- EXF8353
- EXF8354
- EXF8355
- EXF8356
- EXF8586
- EXF8587
- EXF8588
- EXF8590
- EXF8591
- CBS136848
- EXF8592
- DAOM226642
- DAOM242570
- DAOM242571

RPB1 strict parsimony

*W. muriae*

*W. sebi* clade 1

*W. sebi* clade 2

*W. sebi* clade 3

*W. sebi* clade 4

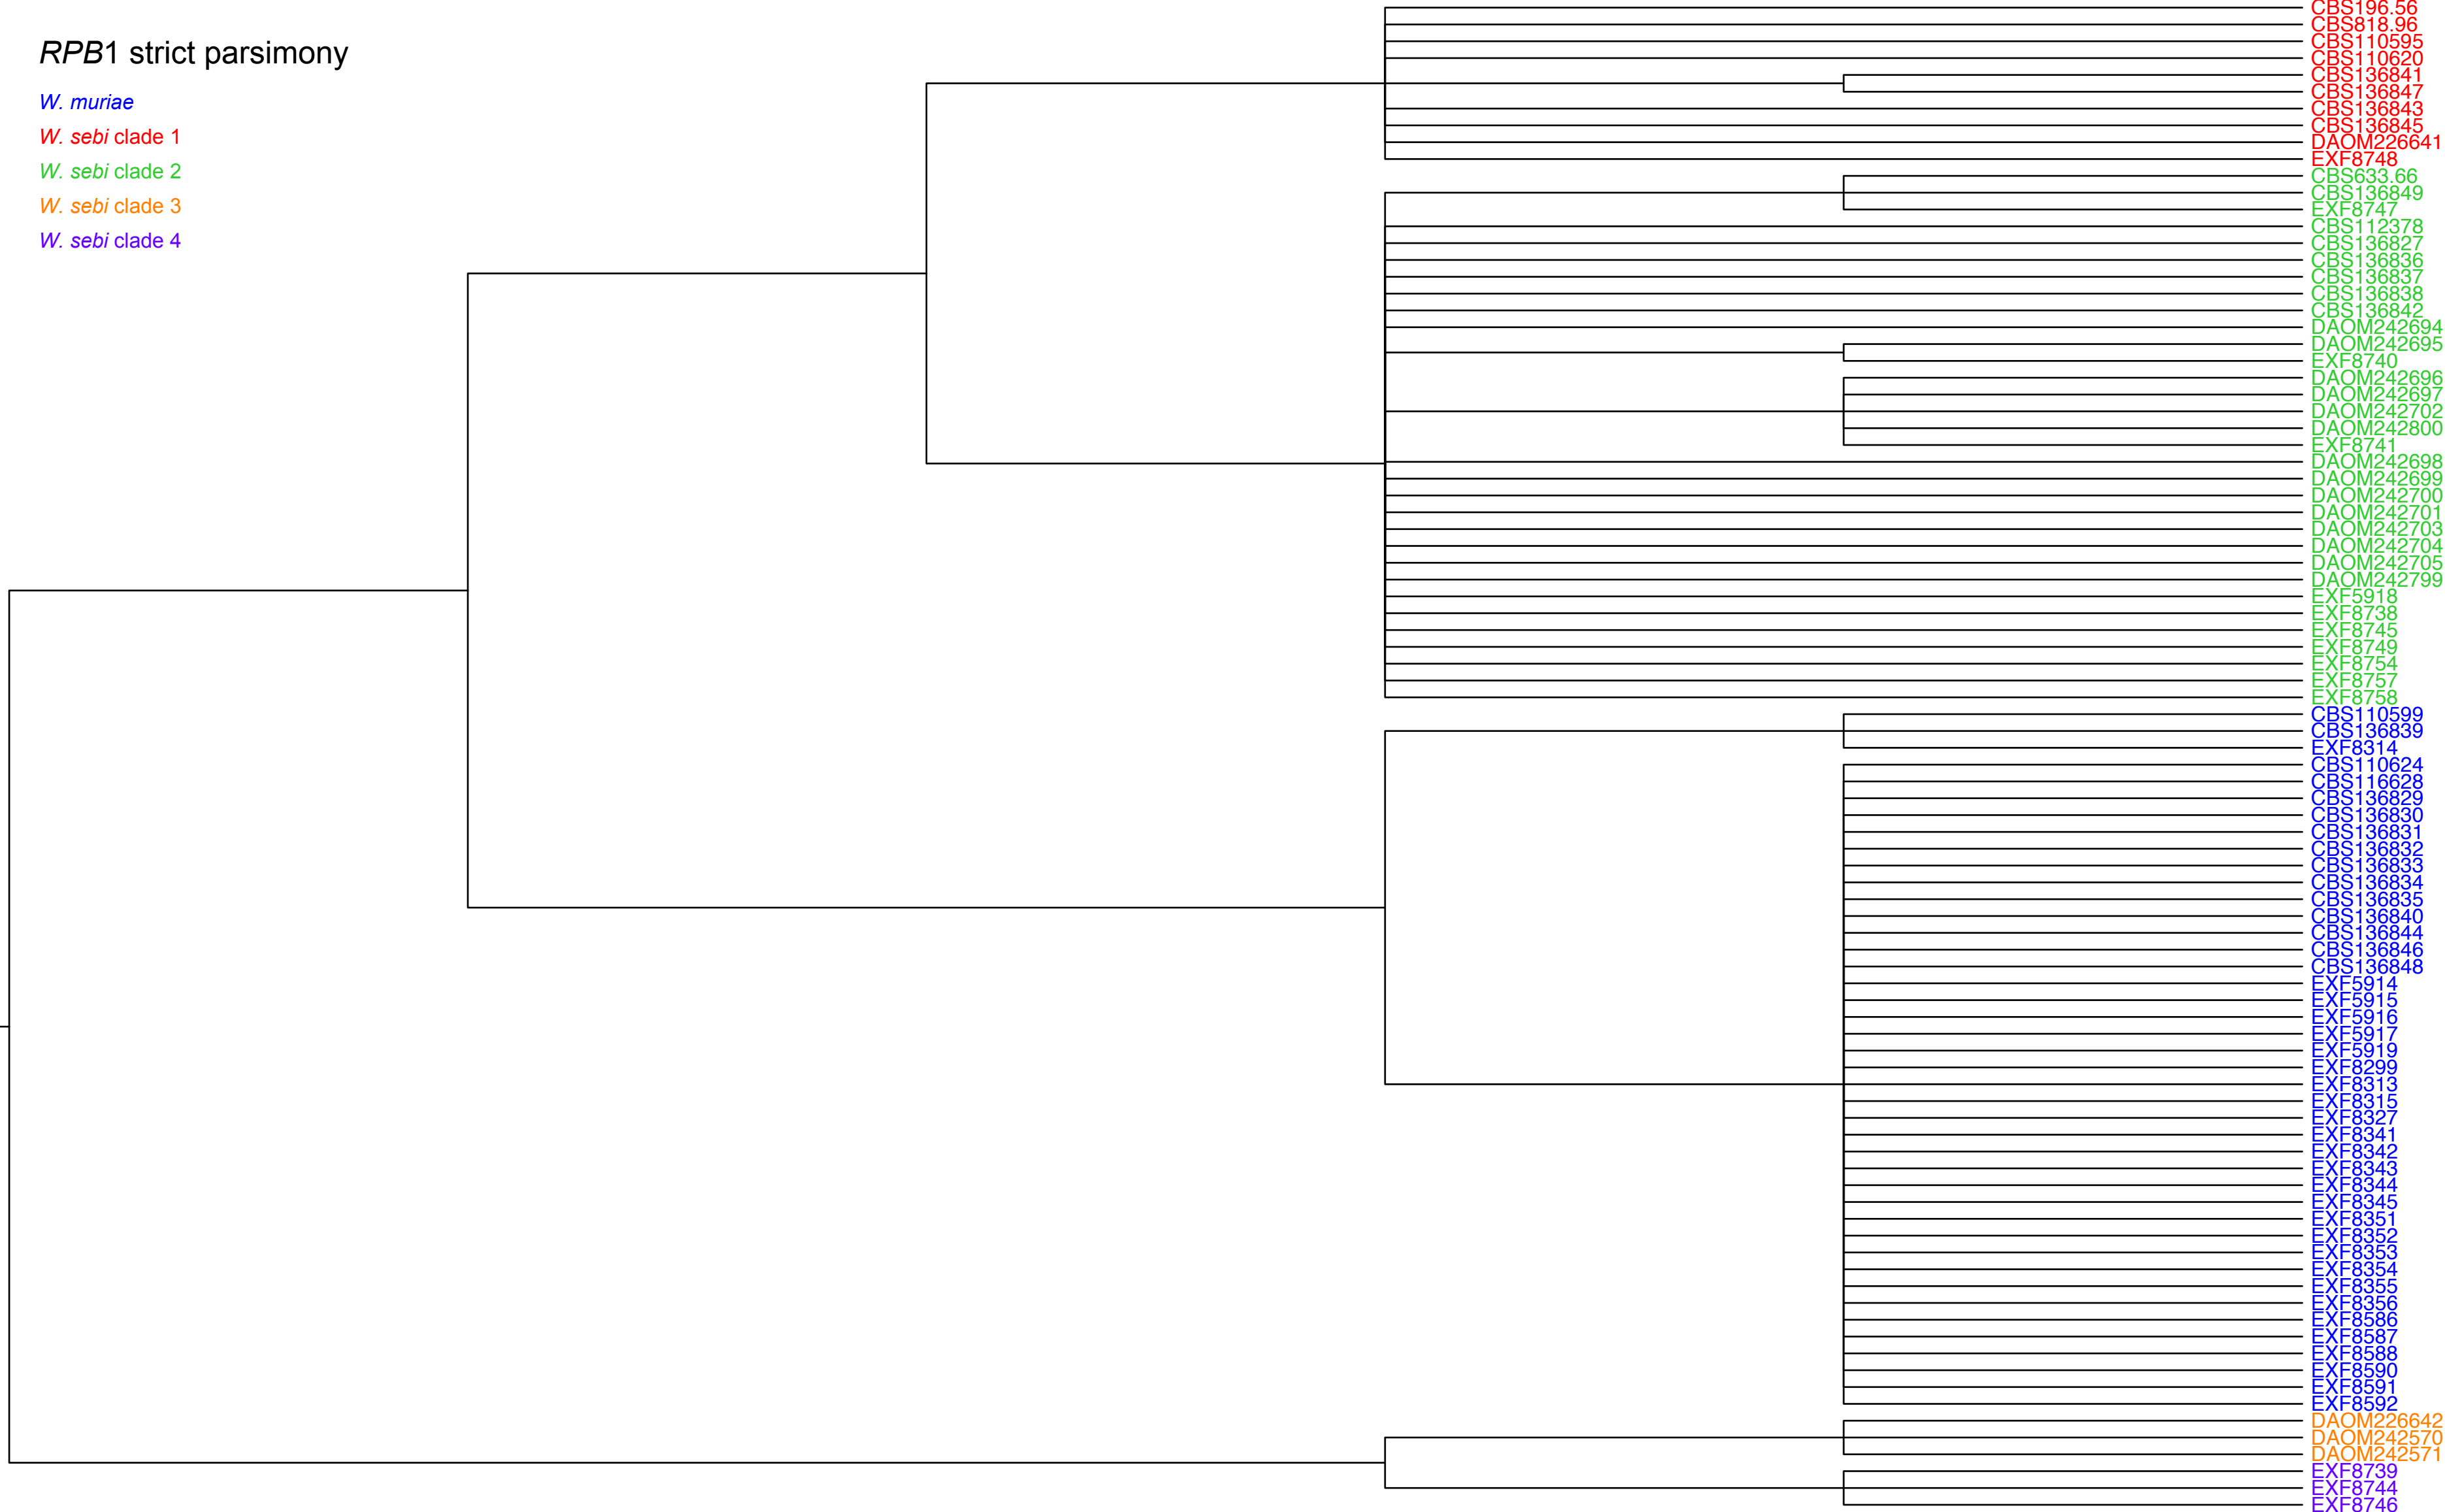

- CBS196.56
- CBS818.96
- CBS110595
- CBS110620
- CBS136841
- CBS136847
- CBS136843
- CBS136845
- DAOM226641
- EXF8748
- CBS633.66
- CBS136849
- EXF8747
- CBS112378
- CBS136827
- CBS136836
- CBS136837
- CBS136838
- CBS136842
- DAOM242694
- DAOM242695
- EXF8740
- DAOM242696
- DAOM242697
- DAOM242702
- DAOM242800
- EXF8741
- DAOM242698
- DAOM242699
- DAOM242700
- DAOM242701
- DAOM242703
- DAOM242704
- DAOM242705
- DAOM242799
- EXF5918
- EXF8738
- EXF8745
- EXF8749
- EXF8754
- EXF8757
- EXF8758
- CBS110599
- CBS136839
- EXF8314
- CBS110624
- CBS116628
- CBS136829
- CBS136830
- CBS136831
- CBS136832
- CBS136833
- CBS136834
- CBS136835
- CBS136840
- CBS136844
- CBS136846
- CBS136848
- EXF5914
- EXF5915
- EXF5916
- EXF5917
- EXF5919
- EXF8299
- EXF8313
- EXF8315
- EXF8327
- EXF8341
- EXF8342
- EXF8343
- EXF8344
- EXF8345
- EXF8351
- EXF8352
- EXF8353
- EXF8354
- EXF8355
- EXF8356
- EXF8586
- EXF8587
- EXF8588
- EXF8590
- EXF8591
- EXF8592
- DAOM226642
- DAOM242570
- DAOM242571
- EXF8739
- EXF8744
- EXF8746



RPB2 strict parsimony

*W. muriae*

*W. sebi* clade 1

*W. sebi* clade 2

*W. sebi* clade 3

*W. sebi* clade 4

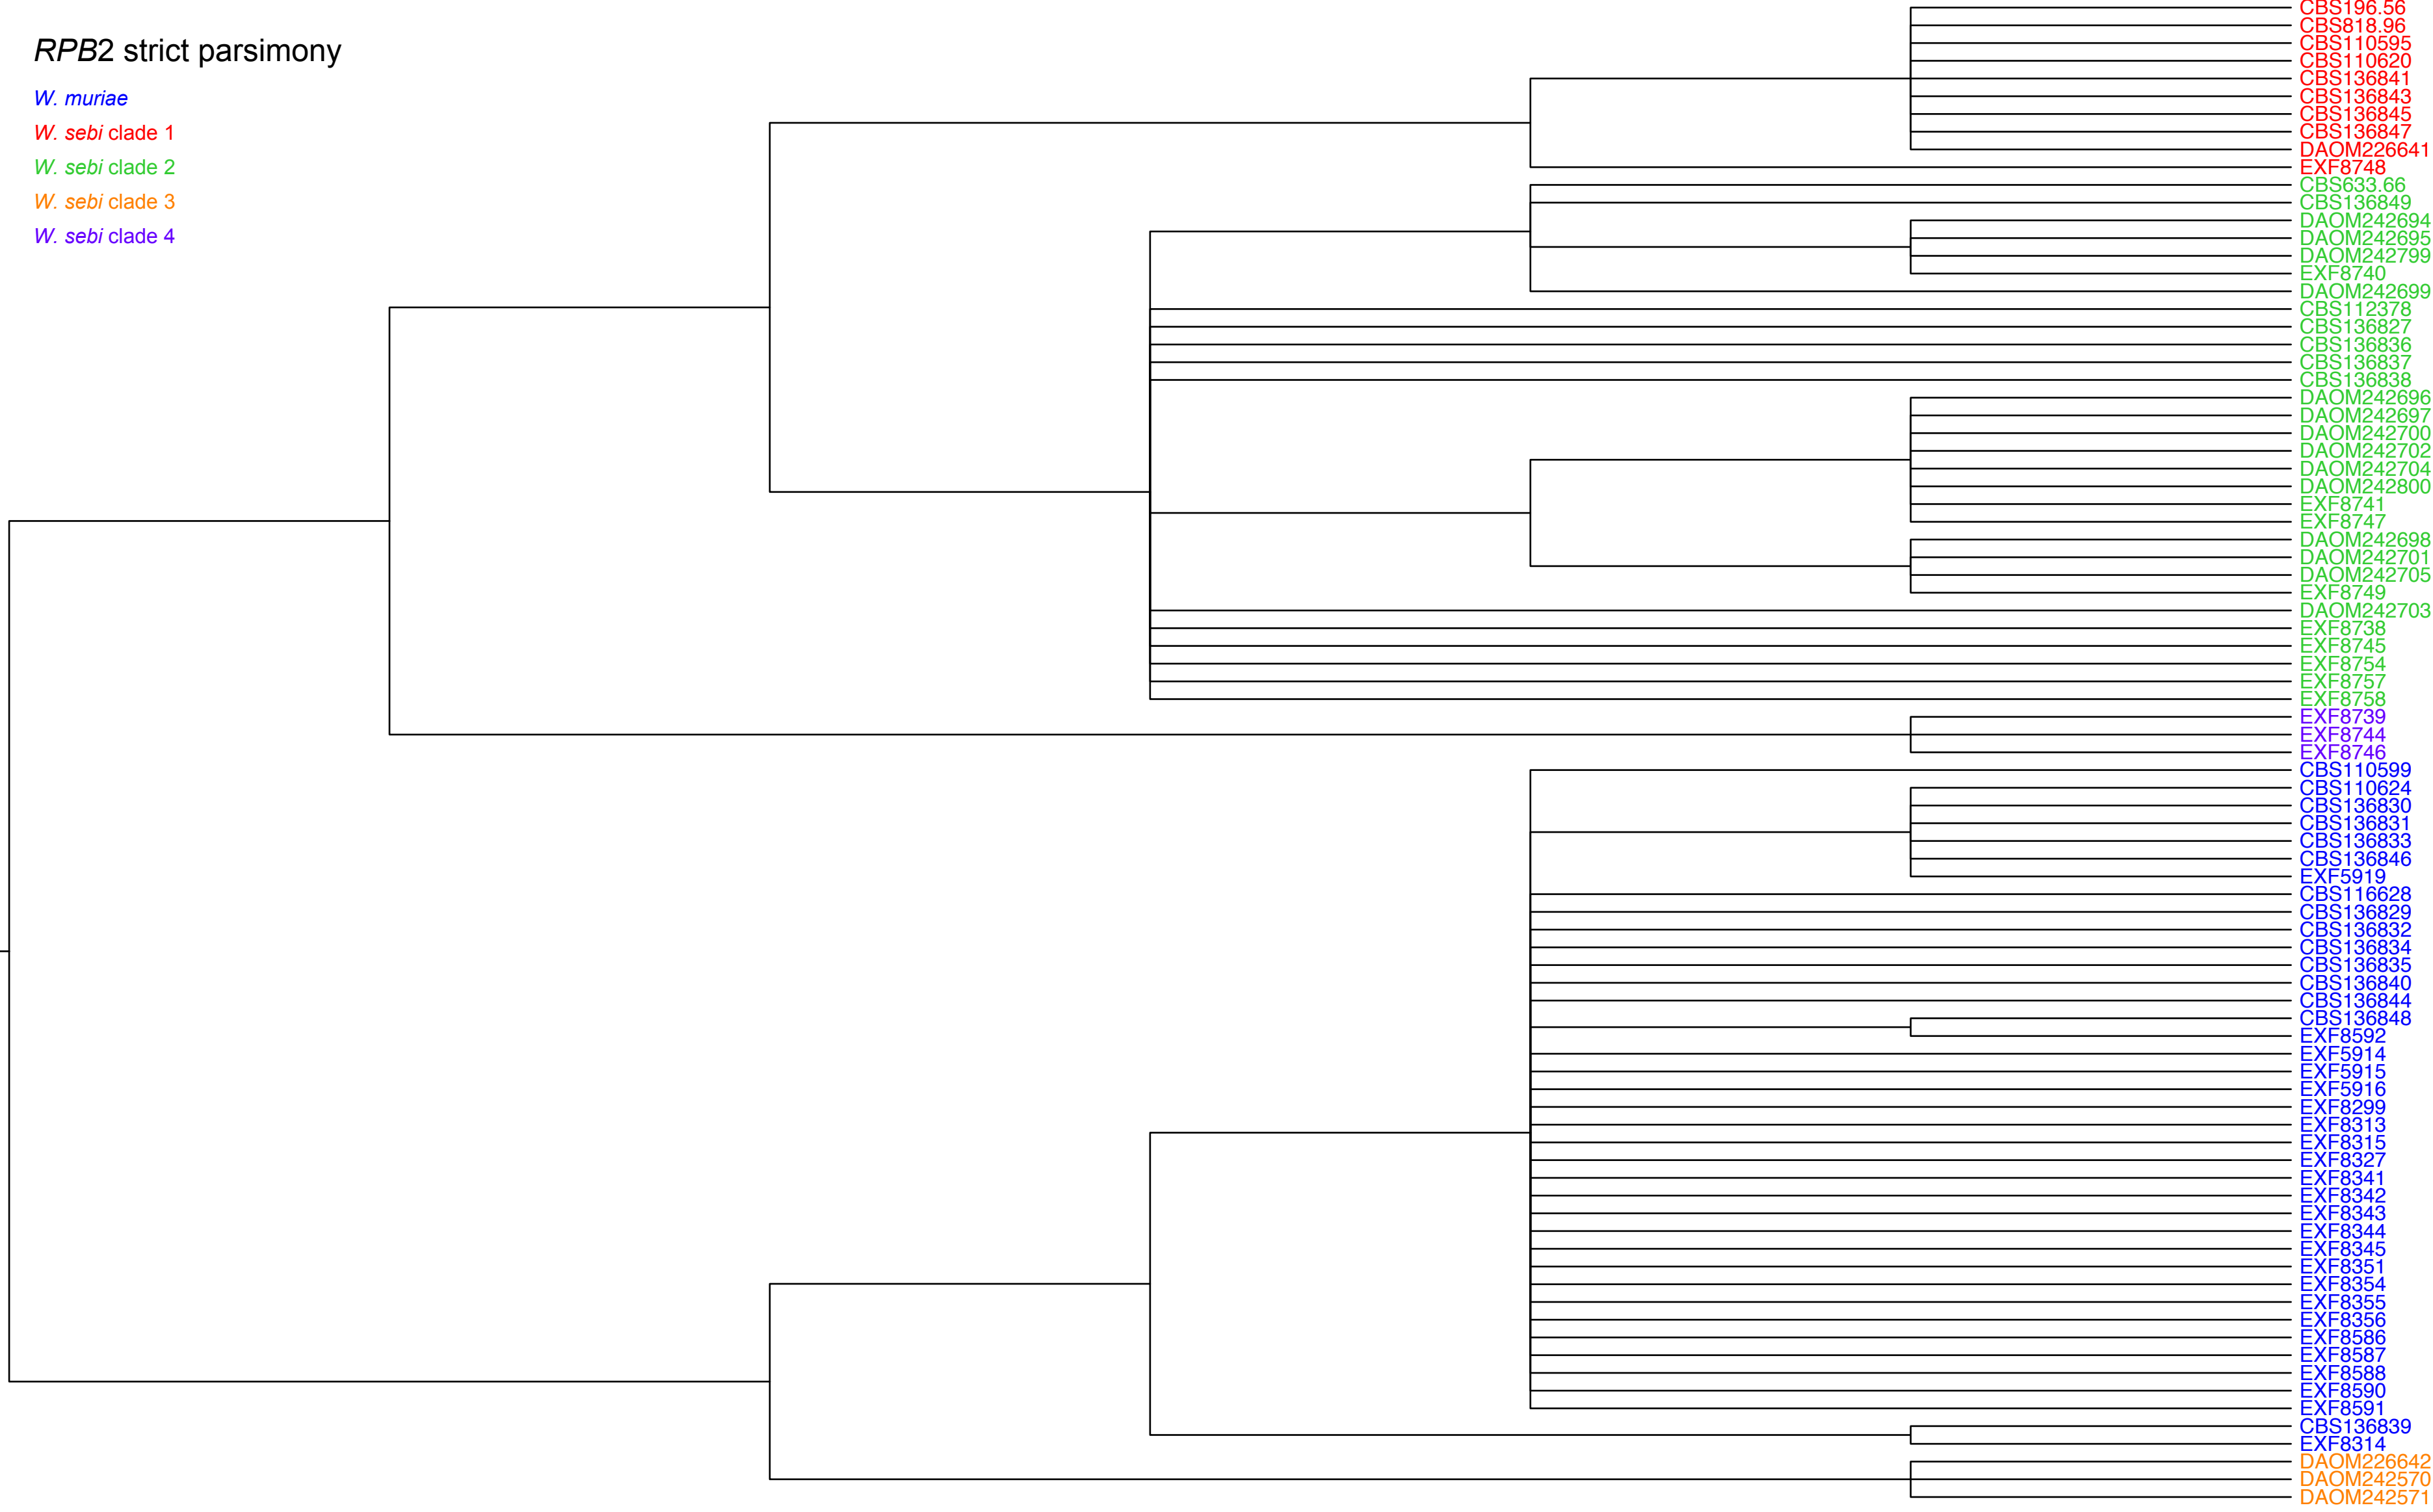

- CBS196.56
- CBS818.96
- CBS110595
- CBS110620
- CBS136841
- CBS136843
- CBS136845
- CBS136847
- DAOM226641
- EXF8748
- CBS633.66
- CBS136849
- DAOM242694
- DAOM242695
- DAOM242799
- EXF8740
- DAOM242699
- CBS112378
- CBS136827
- CBS136836
- CBS136837
- CBS136838
- DAOM242696
- DAOM242697
- DAOM242700
- DAOM242702
- DAOM242704
- DAOM242800
- EXF8741
- EXF8747
- DAOM242698
- DAOM242701
- DAOM242705
- EXF8749
- DAOM242703
- EXF8738
- EXF8745
- EXF8754
- EXF8757
- EXF8758
- EXF8739
- EXF8744
- EXF8746
- CBS110599
- CBS110624
- CBS136830
- CBS136831
- CBS136833
- CBS136846
- EXF5919
- CBS116628
- CBS136829
- CBS136832
- CBS136834
- CBS136835
- CBS136840
- CBS136844
- CBS136848
- EXF8592
- EXF5914
- EXF5915
- EXF5916
- EXF8299
- EXF8313
- EXF8315
- EXF8327
- EXF8341
- EXF8342
- EXF8343
- EXF8344
- EXF8345
- EXF8351
- EXF8354
- EXF8355
- EXF8356
- EXF8586
- EXF8587
- EXF8588
- EXF8590
- EXF8591
- CBS136839
- EXF8314
- DAOM226642
- DAOM242570
- DAOM242571

# TSR1 strict parsimony

*W. muriae*

*W. sebi* clade 1

*W. sebi* clade 2

*W. sebi* clade 3

*W. sebi* clade 4

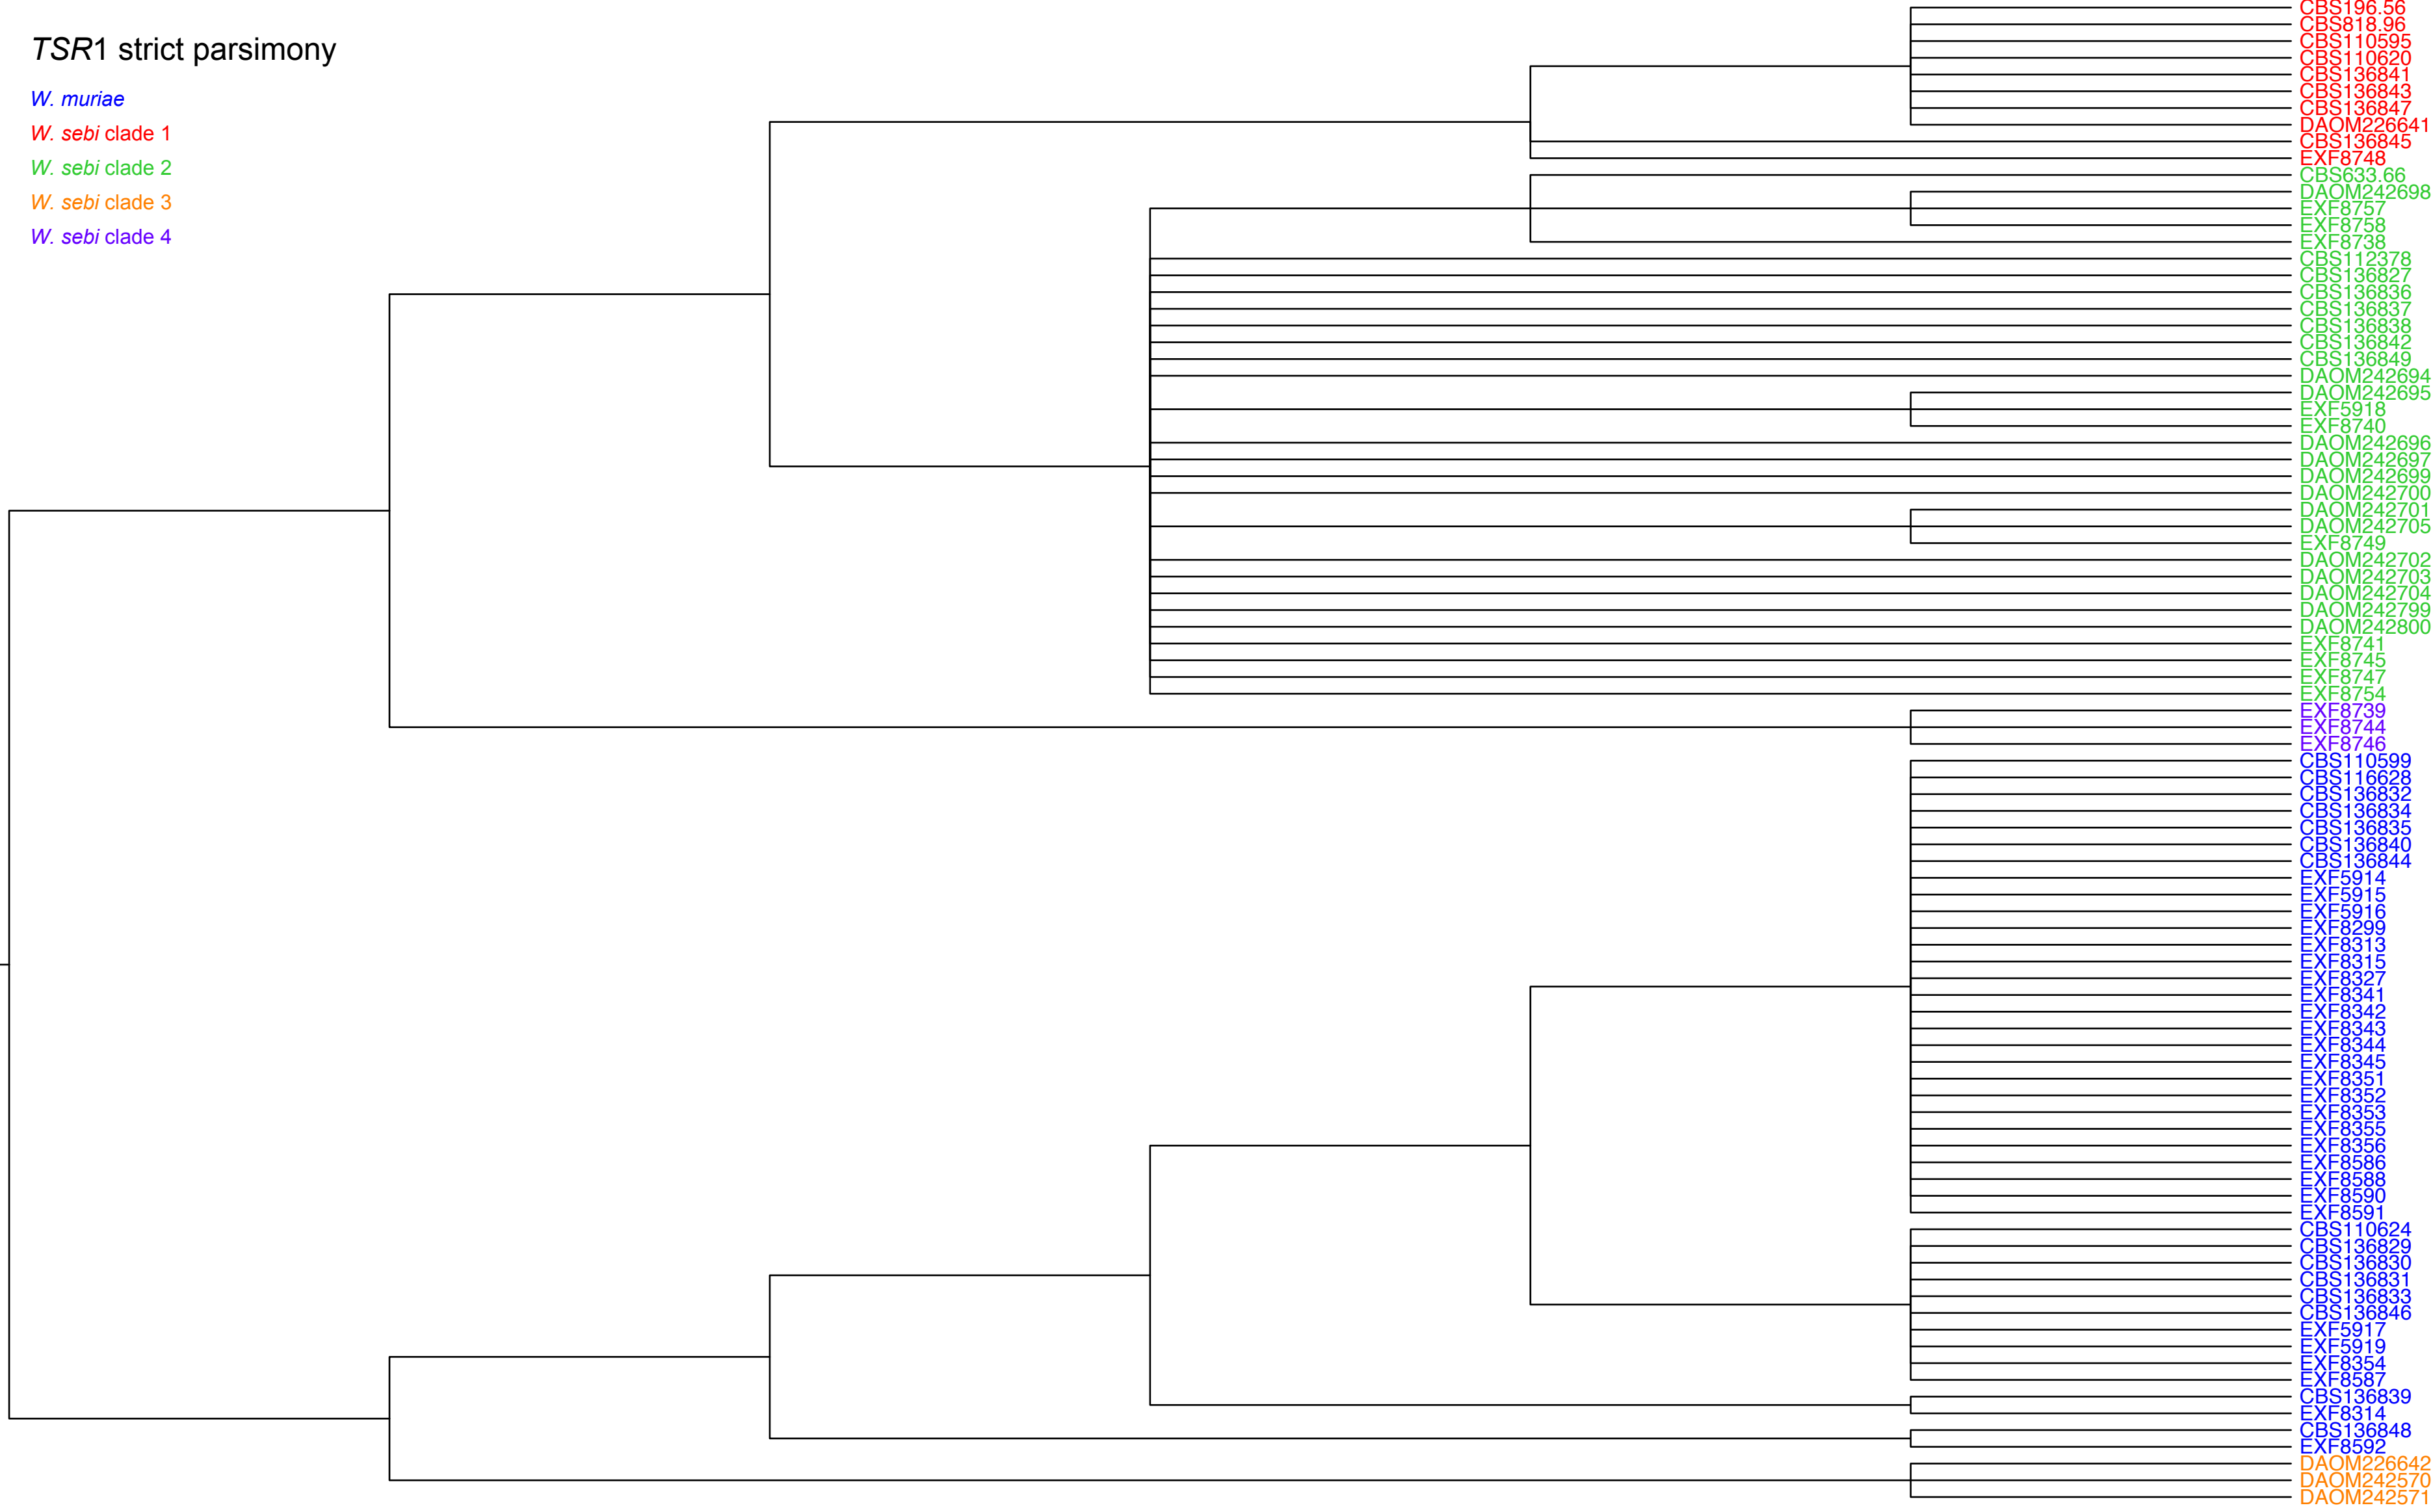

- CBS196.56
- DAOM22641
- CBS136841
- CBS136843
- CBS136847
- CBS136845
- XF8748
- CBS633.66
- DAOM242698
- XF8757
- XF8758
- XF8738
- CBS112378
- CBS136827
- CBS136836
- CBS136837
- CBS136838
- CBS136842
- CBS136849
- DAOM242694
- DAOM242695
- XF5918
- XF8740
- DAOM242696
- DAOM242697
- DAOM242699
- DAOM242700
- DAOM242701
- DAOM242705
- XF8749
- DAOM242702
- DAOM242703
- DAOM242704
- DAOM242799
- DAOM242800
- XF8741
- XF8745
- XF8747
- XF8754
- XF8739
- XF8744
- XF8746
- CBS110599
- CBS116628
- CBS136832
- CBS136834
- CBS136835
- CBS136840
- CBS136844
- XF5914
- XF5915
- XF5916
- XF8299
- XF8313
- XF8315
- XF8327
- XF8341
- XF8342
- XF8343
- XF8344
- XF8345
- XF8351
- XF8352
- XF8353
- XF8355
- XF8356
- XF8586
- XF8588
- XF8590
- XF8591
- CBS110624
- CBS136829
- CBS136830
- CBS136831
- CBS136833
- CBS136846
- XF5917
- XF5919
- XF8354
- XF8587
- CBS136839
- XF8314
- CBS136848
- XF8592
- DAOM22642
- DAOM242570
- DAOM242571

ITS maximum likelihood

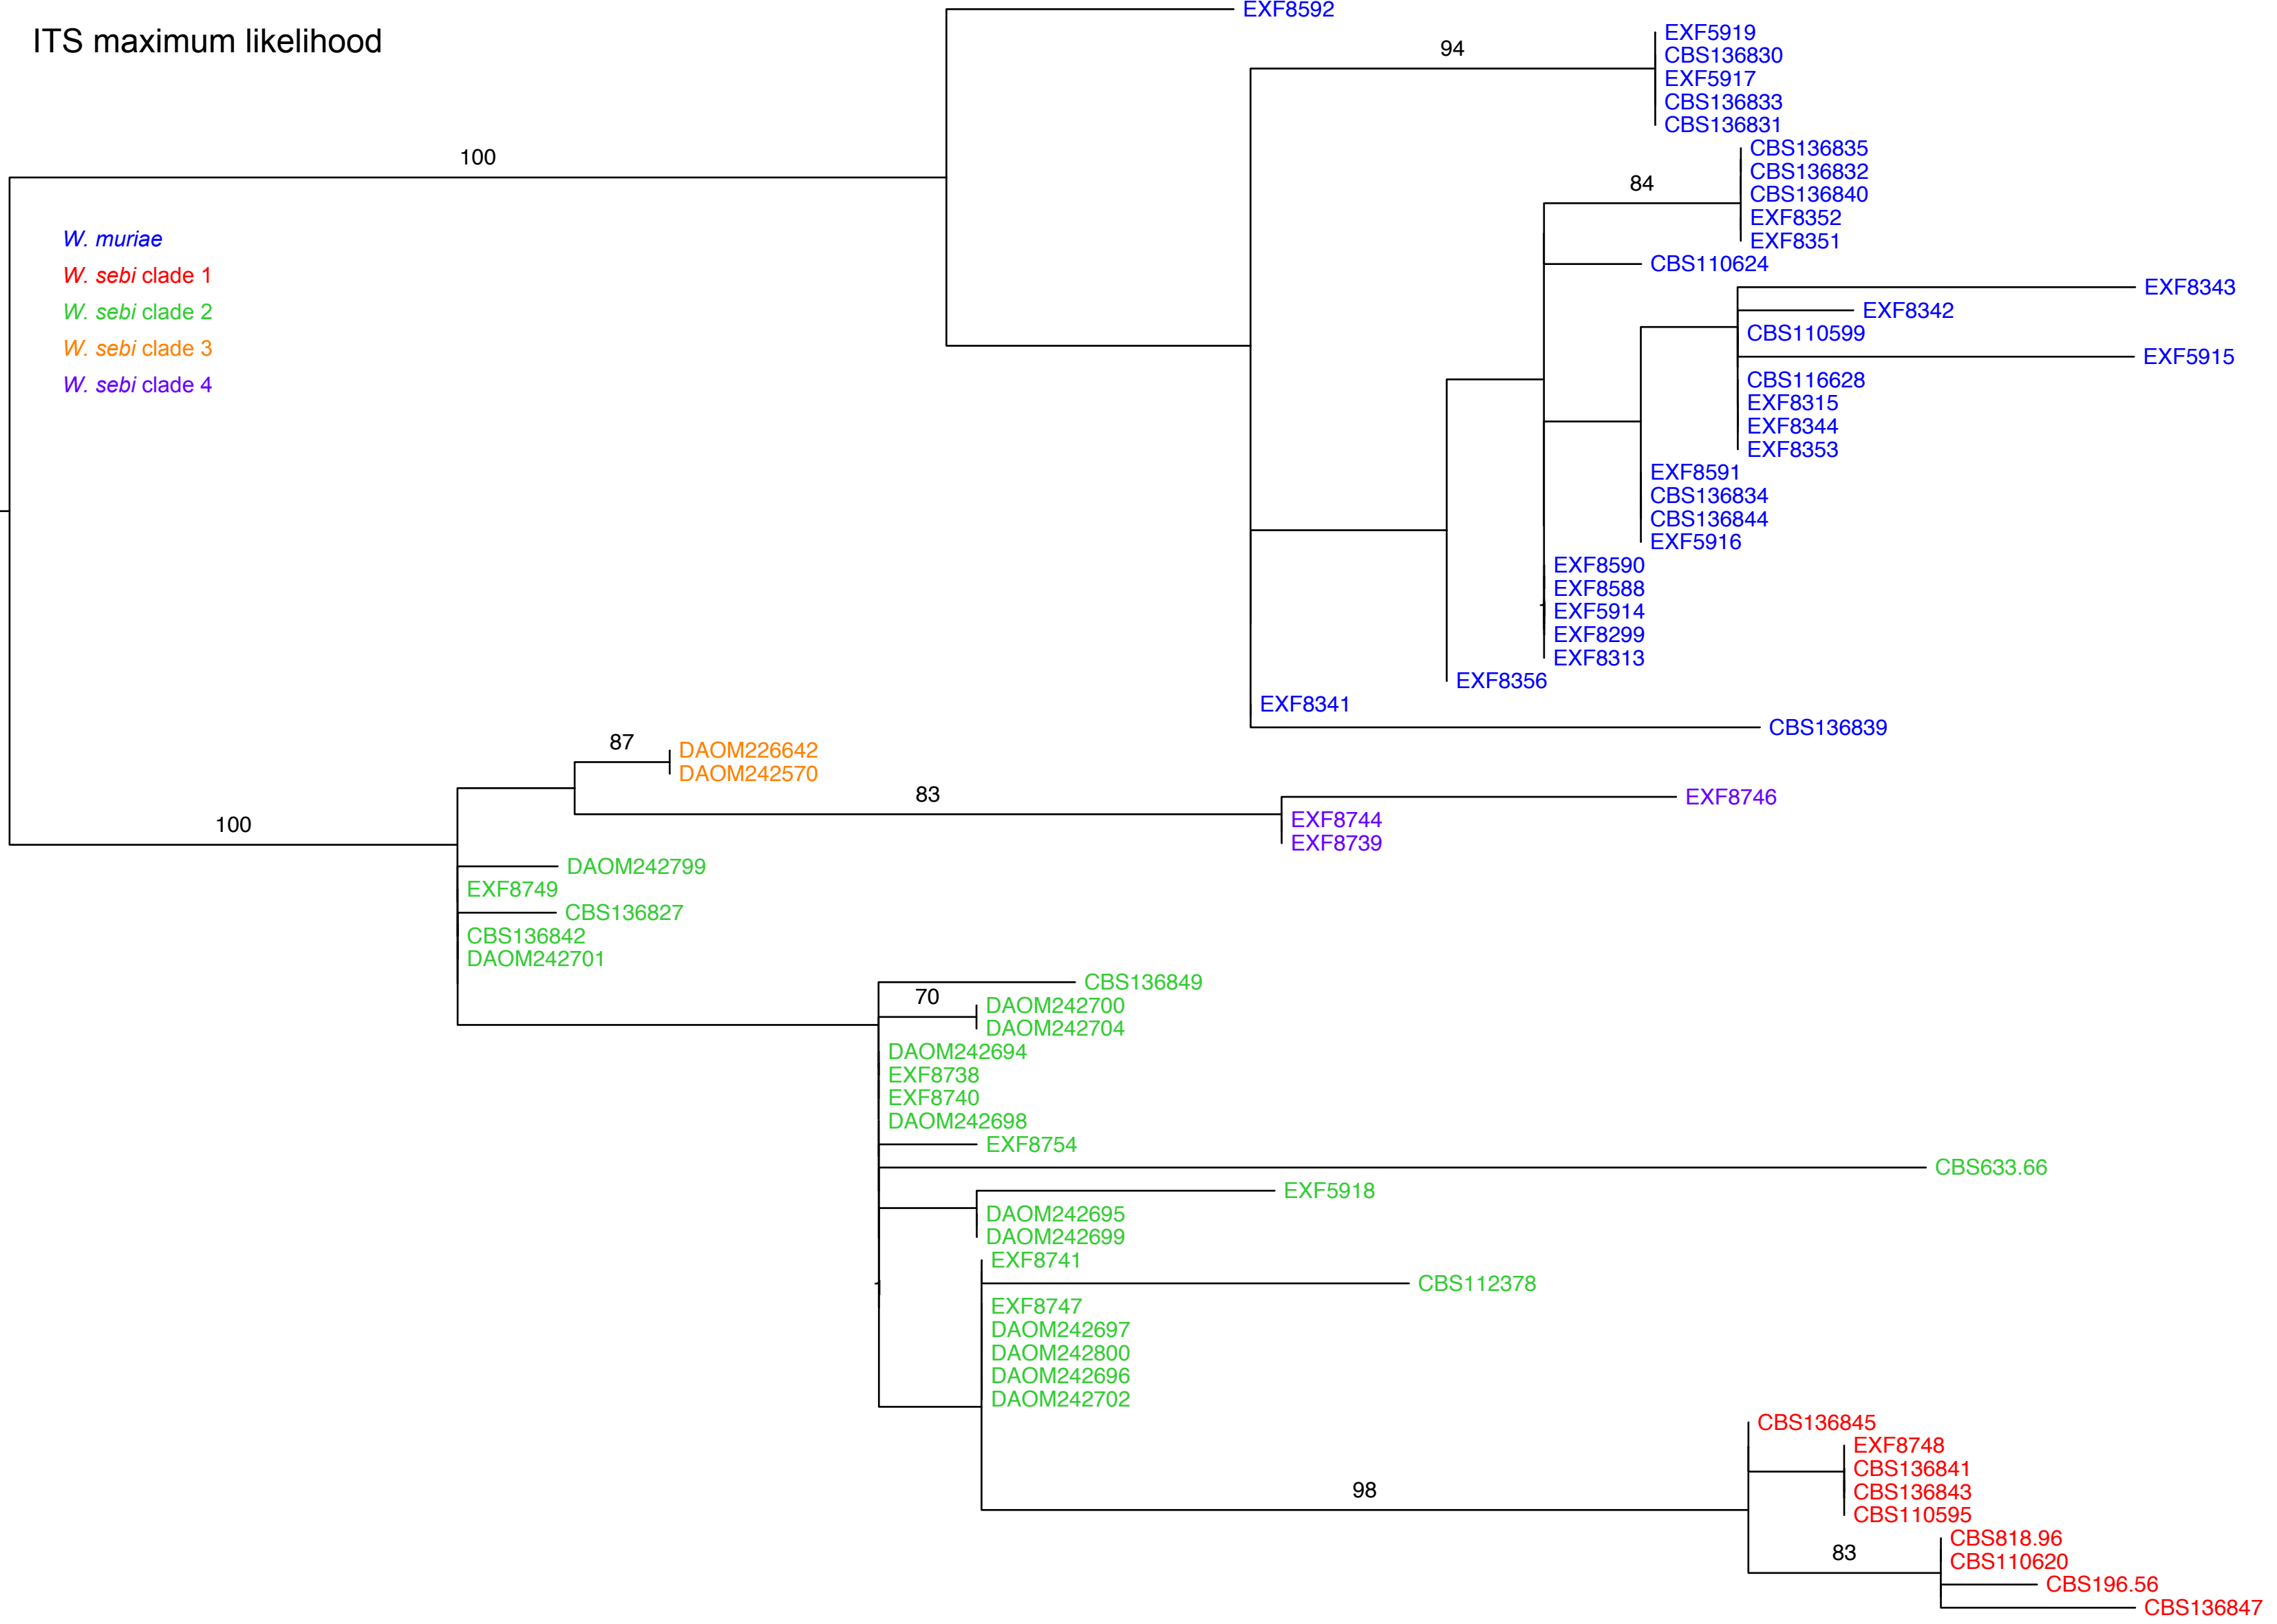

MCM7 maximum likelihood

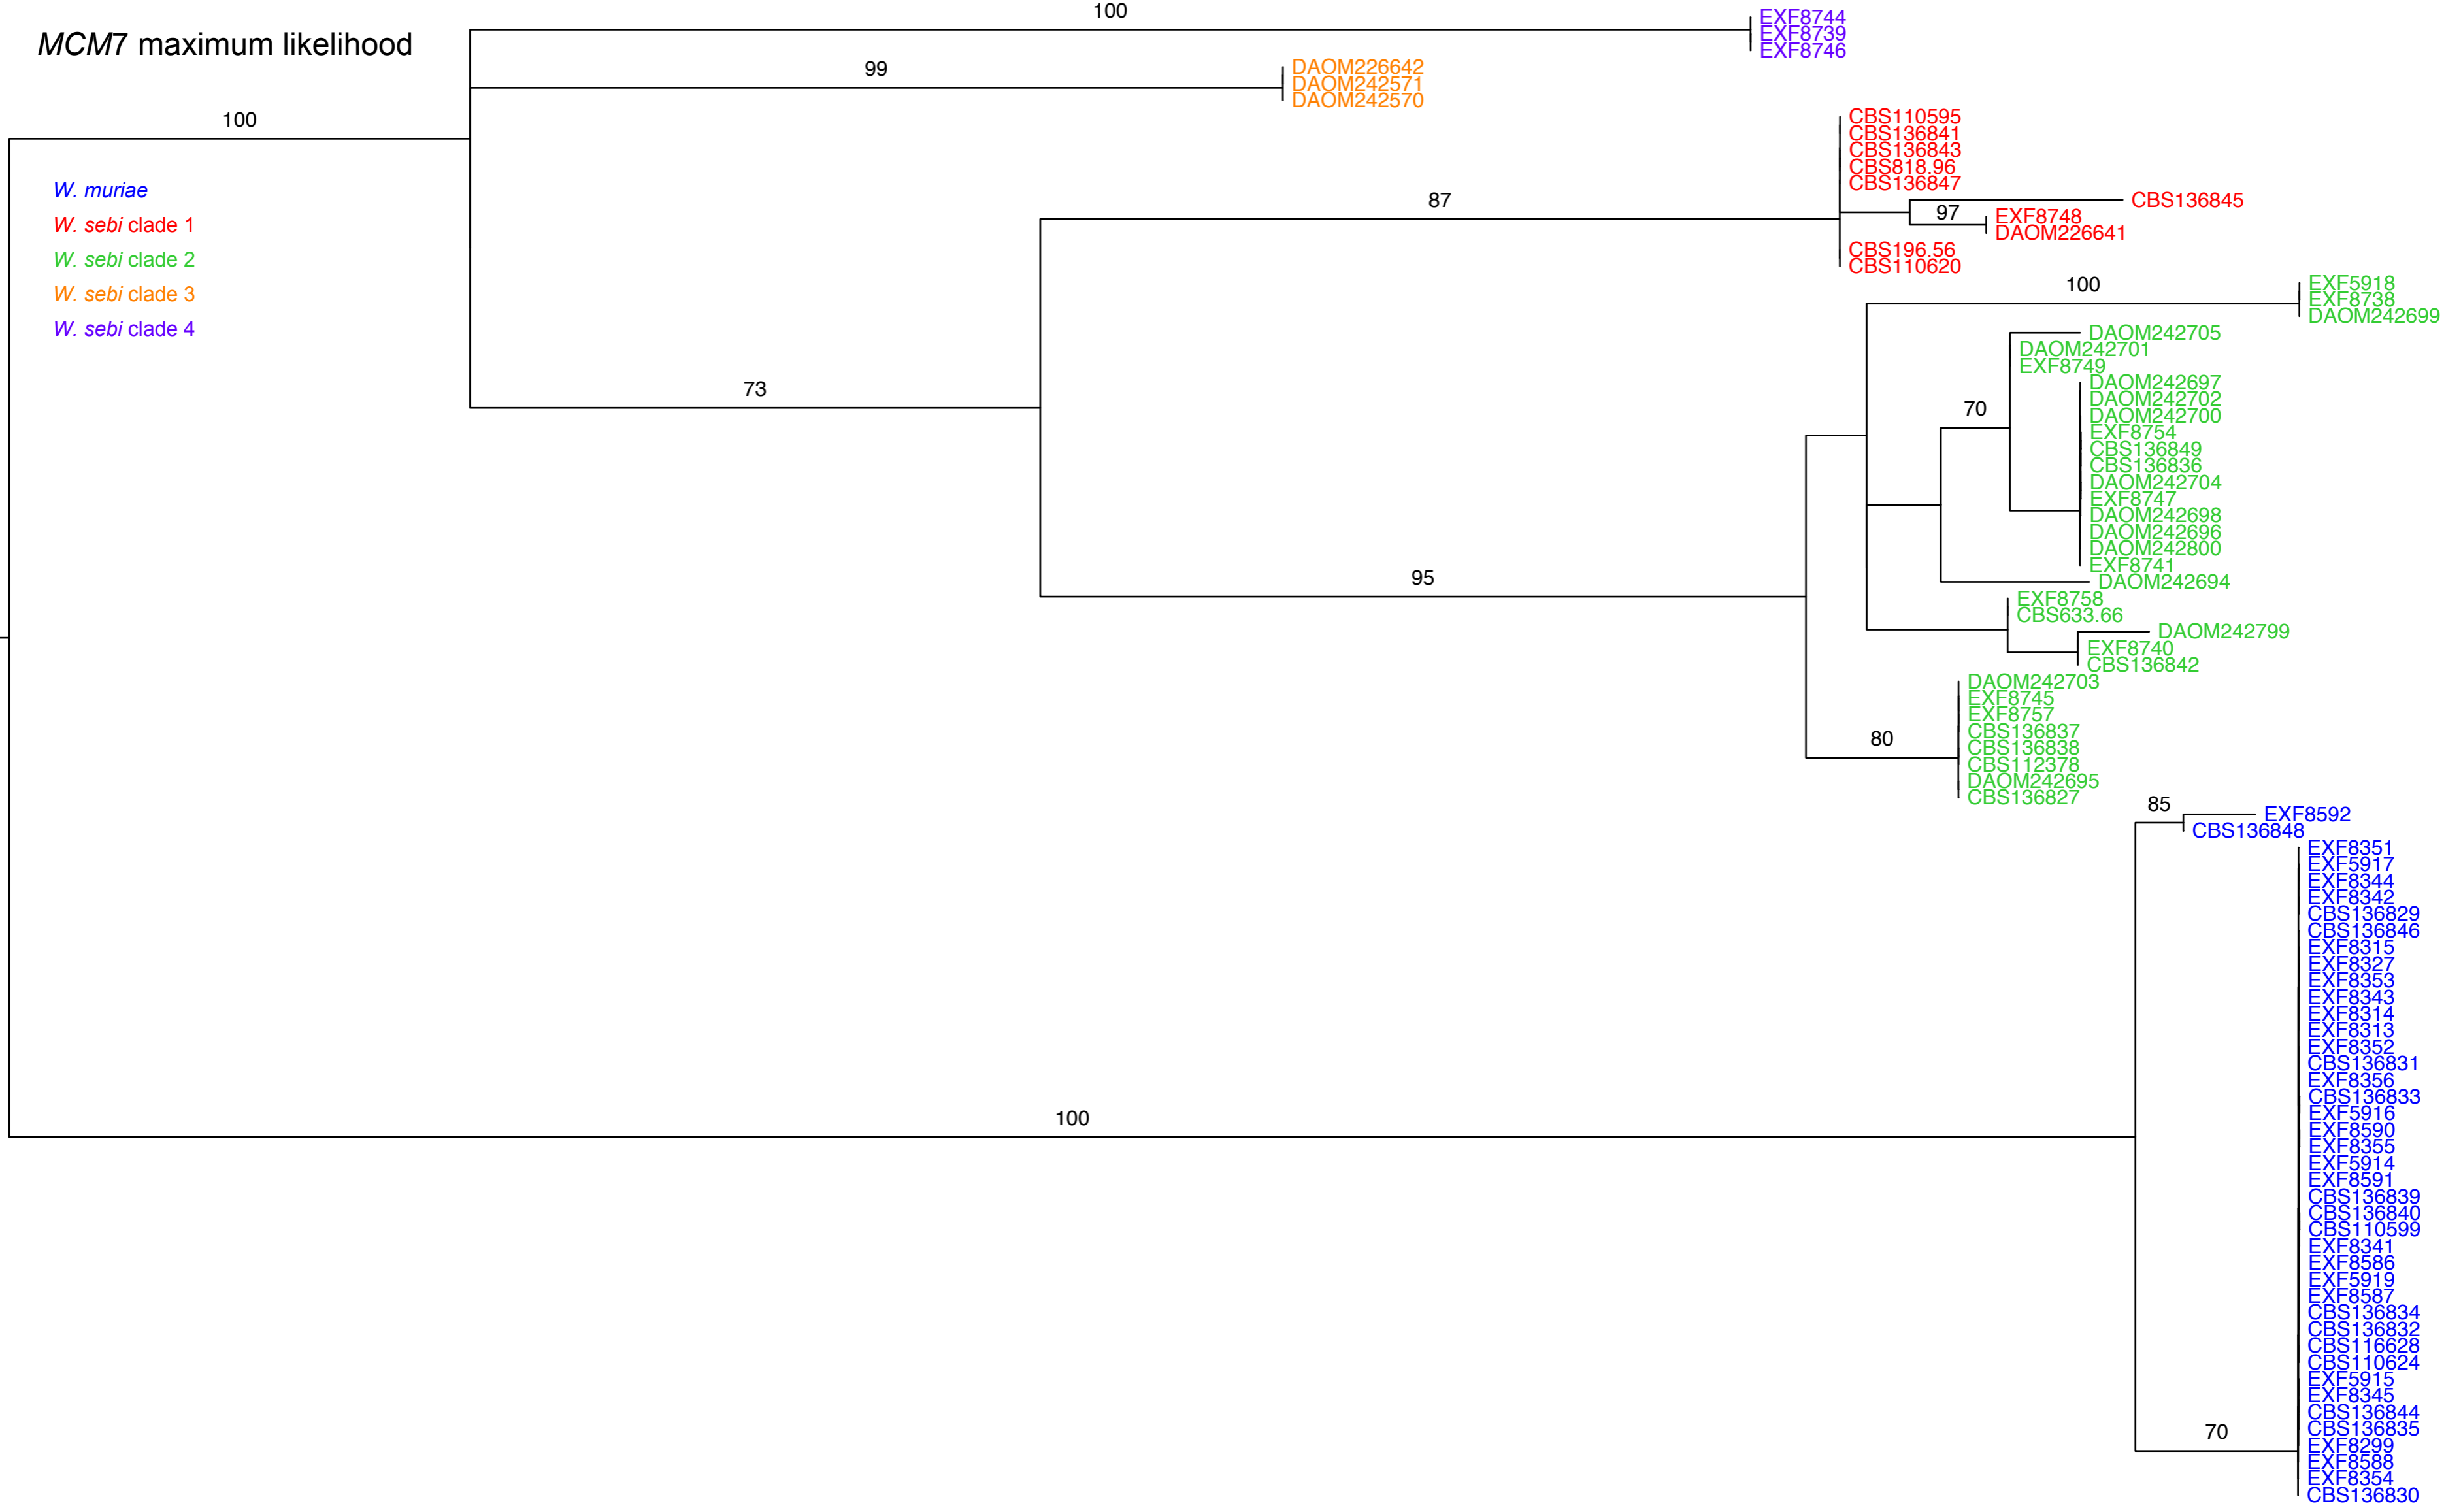

0.02

*RPB1* maximum likelihood

*W. muriae*

*W. sebi* clade 1

*W. sebi* clade 2

*W. sebi* clade 3

*W. sebi* clade 4

DAOM242571  
DAOM242570  
DAOM226642

EXF8746  
EXF8744  
EXF8739

DAOM242705  
EXF5918  
CBS136837  
DAOM242704  
91  
EXF8747  
CBS633.66  
CBS136849  
DAOM242697  
EXF8741  
DAOM242702  
DAOM242800  
DAOM242696  
EXF8745  
DAOM242700  
CBS136838  
CBS136827  
EXF8738  
DAOM242799  
EXF8749  
DAOM242698  
DAOM242694  
DAOM242703  
CBS112378  
EXF8758  
CBS136842  
DAOM242701  
DAOM242699  
DAOM242695  
EXF8740  
EXF8757  
CBS136836  
EXF8754

99

89

96

80

CBS136845  
EXF8748  
89  
CBS136847  
CBS136841  
CBS818.96  
CBS110620  
CBS110595  
CBS196.56  
CBS136843  
DAOM226641

78

CBS110624  
CBS136844  
EXF8356  
EXF5914  
CBS136832  
CBS136833  
EXF8351  
EXF8299  
EXF8354  
CBS136846  
EXF8353  
CBS136840  
EXF8344  
EXF8588  
EXF8586  
EXF8327  
EXF8345  
EXF5915  
EXF8592  
EXF8590  
CBS136834  
EXF8341  
CBS136831  
EXF5917  
EXF8342  
EXF8352  
CBS136830  
EXF8315  
EXF5919  
EXF8343  
EXF8591  
EXF8313  
EXF8355  
EXF5916  
CBS116628  
CBS136829  
EXF8587  
CBS136835  
CBS136848  
CBS136839  
EXF8314  
CBS110599

98

100

100

100

0.0070

RPB2 maximum likelihood

*W. muriae*

*W. sebi* clade 1

*W. sebi* clade 2

*W. sebi* clade 3

*W. sebi* clade 4

CBS196.56 EXF8748  
CBS818.96  
CBS136847  
DAOM226641  
CBS136841  
CBS136845  
CBS110595  
CBS110620  
CBS136843

DAOM242696  
DAOM242704  
DAOM242697  
DAOM242700  
EXF8741  
DAOM242800  
EXF8747  
DAOM242702  
EXF8749  
DAOM242705  
DAOM242698  
DAOM242701

CBS136838  
EXF8745  
EXF8758  
CBS136837  
EXF8738  
CBS112378  
DAOM242703  
EXF8757  
CBS136827  
EXF8754  
CBS136836  
CBS136849  
DAOM242699  
DAOM242694  
DAOM242695  
DAOM242799  
EXF8740  
CBS633.66

DAOM226642  
DAOM242570  
DAOM242571

CBS136848  
EXF8592  
CBS136835  
EXF8313  
CBS110599  
EXF8591  
EXF5919  
CBS136846  
CBS110624  
CBS136833  
CBS136830  
CBS136831

EXF8343  
EXF8342  
EXF5916  
EXF8356  
CBS136834  
CBS136840  
CBS136829  
CBS136844  
EXF8587  
EXF8344  
EXF8315  
EXF8327  
EXF8588  
EXF8345  
EXF8341  
EXF8590  
EXF5914  
EXF5915  
EXF8354  
EXF8351  
EXF8586  
EXF8355  
EXF8299  
CBS116628  
CBS136832

CBS136839  
EXF8314

EXF8744  
EXF8739  
EXF8746

0.0090

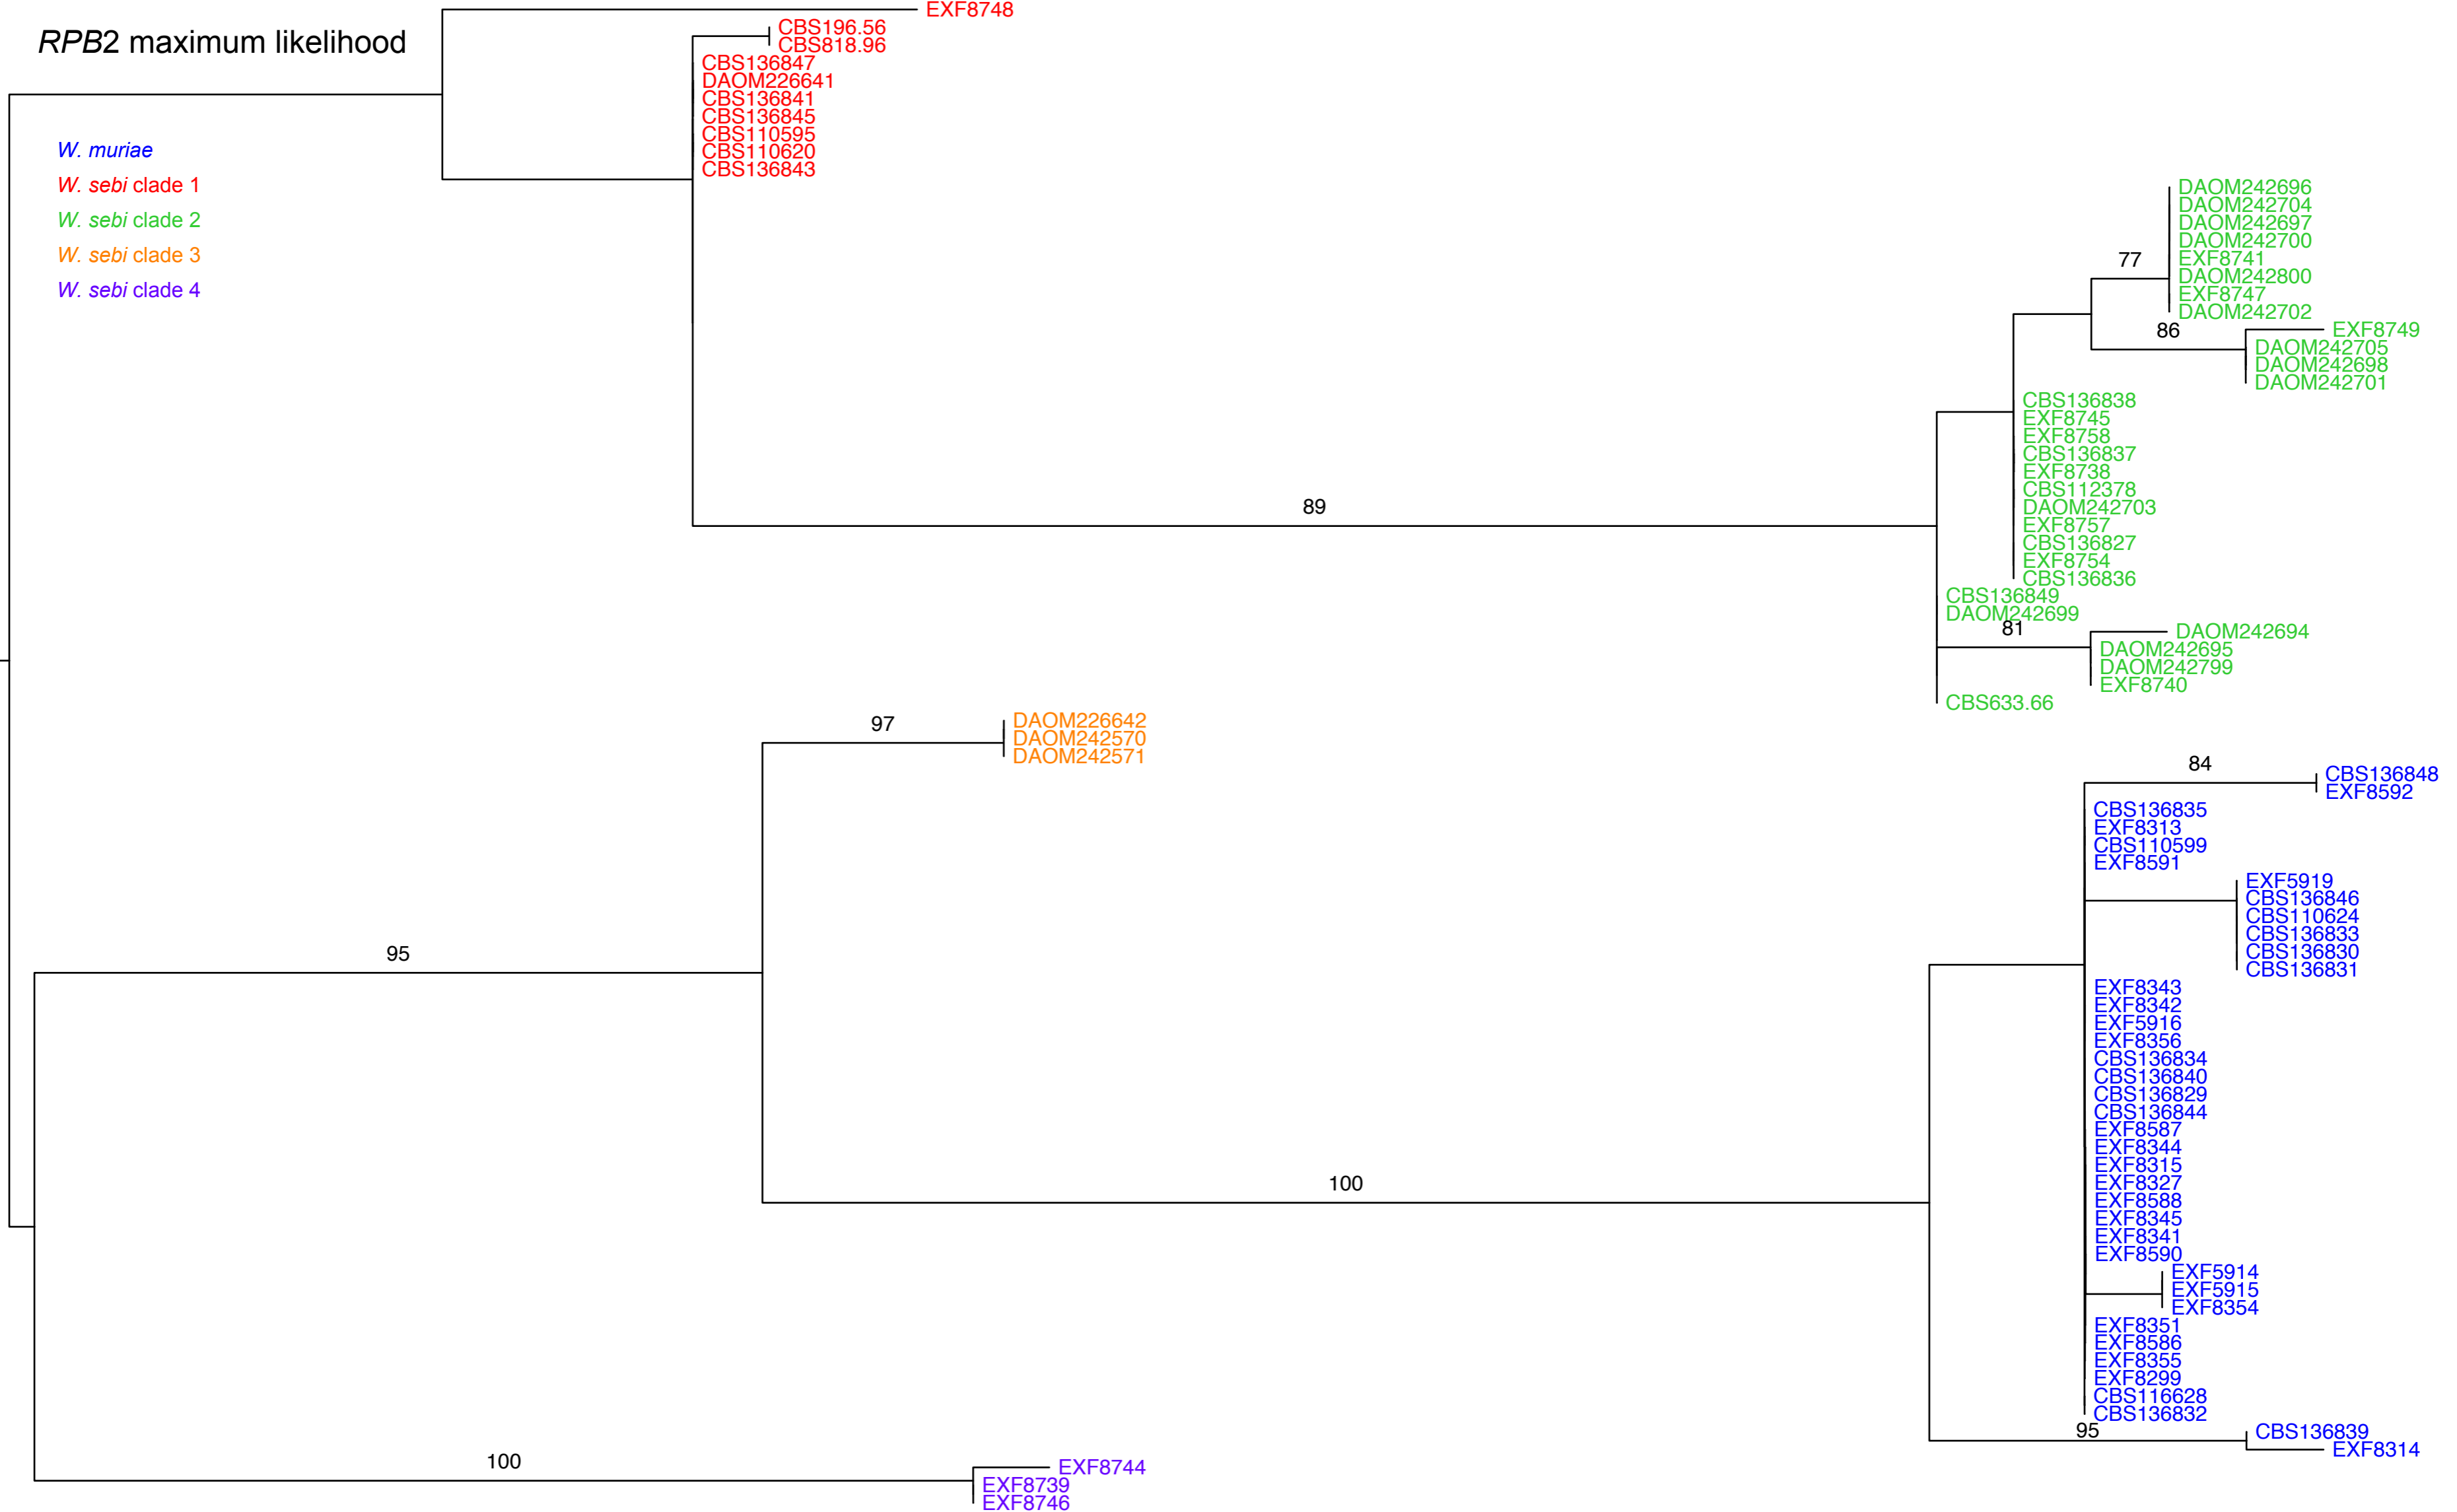

TSR1 maximum likelihood

*W. muriae*  
*W. sebi* clade 1      *W. sebi* clade 3  
*W. sebi* clade 2      *W. sebi* clade 4

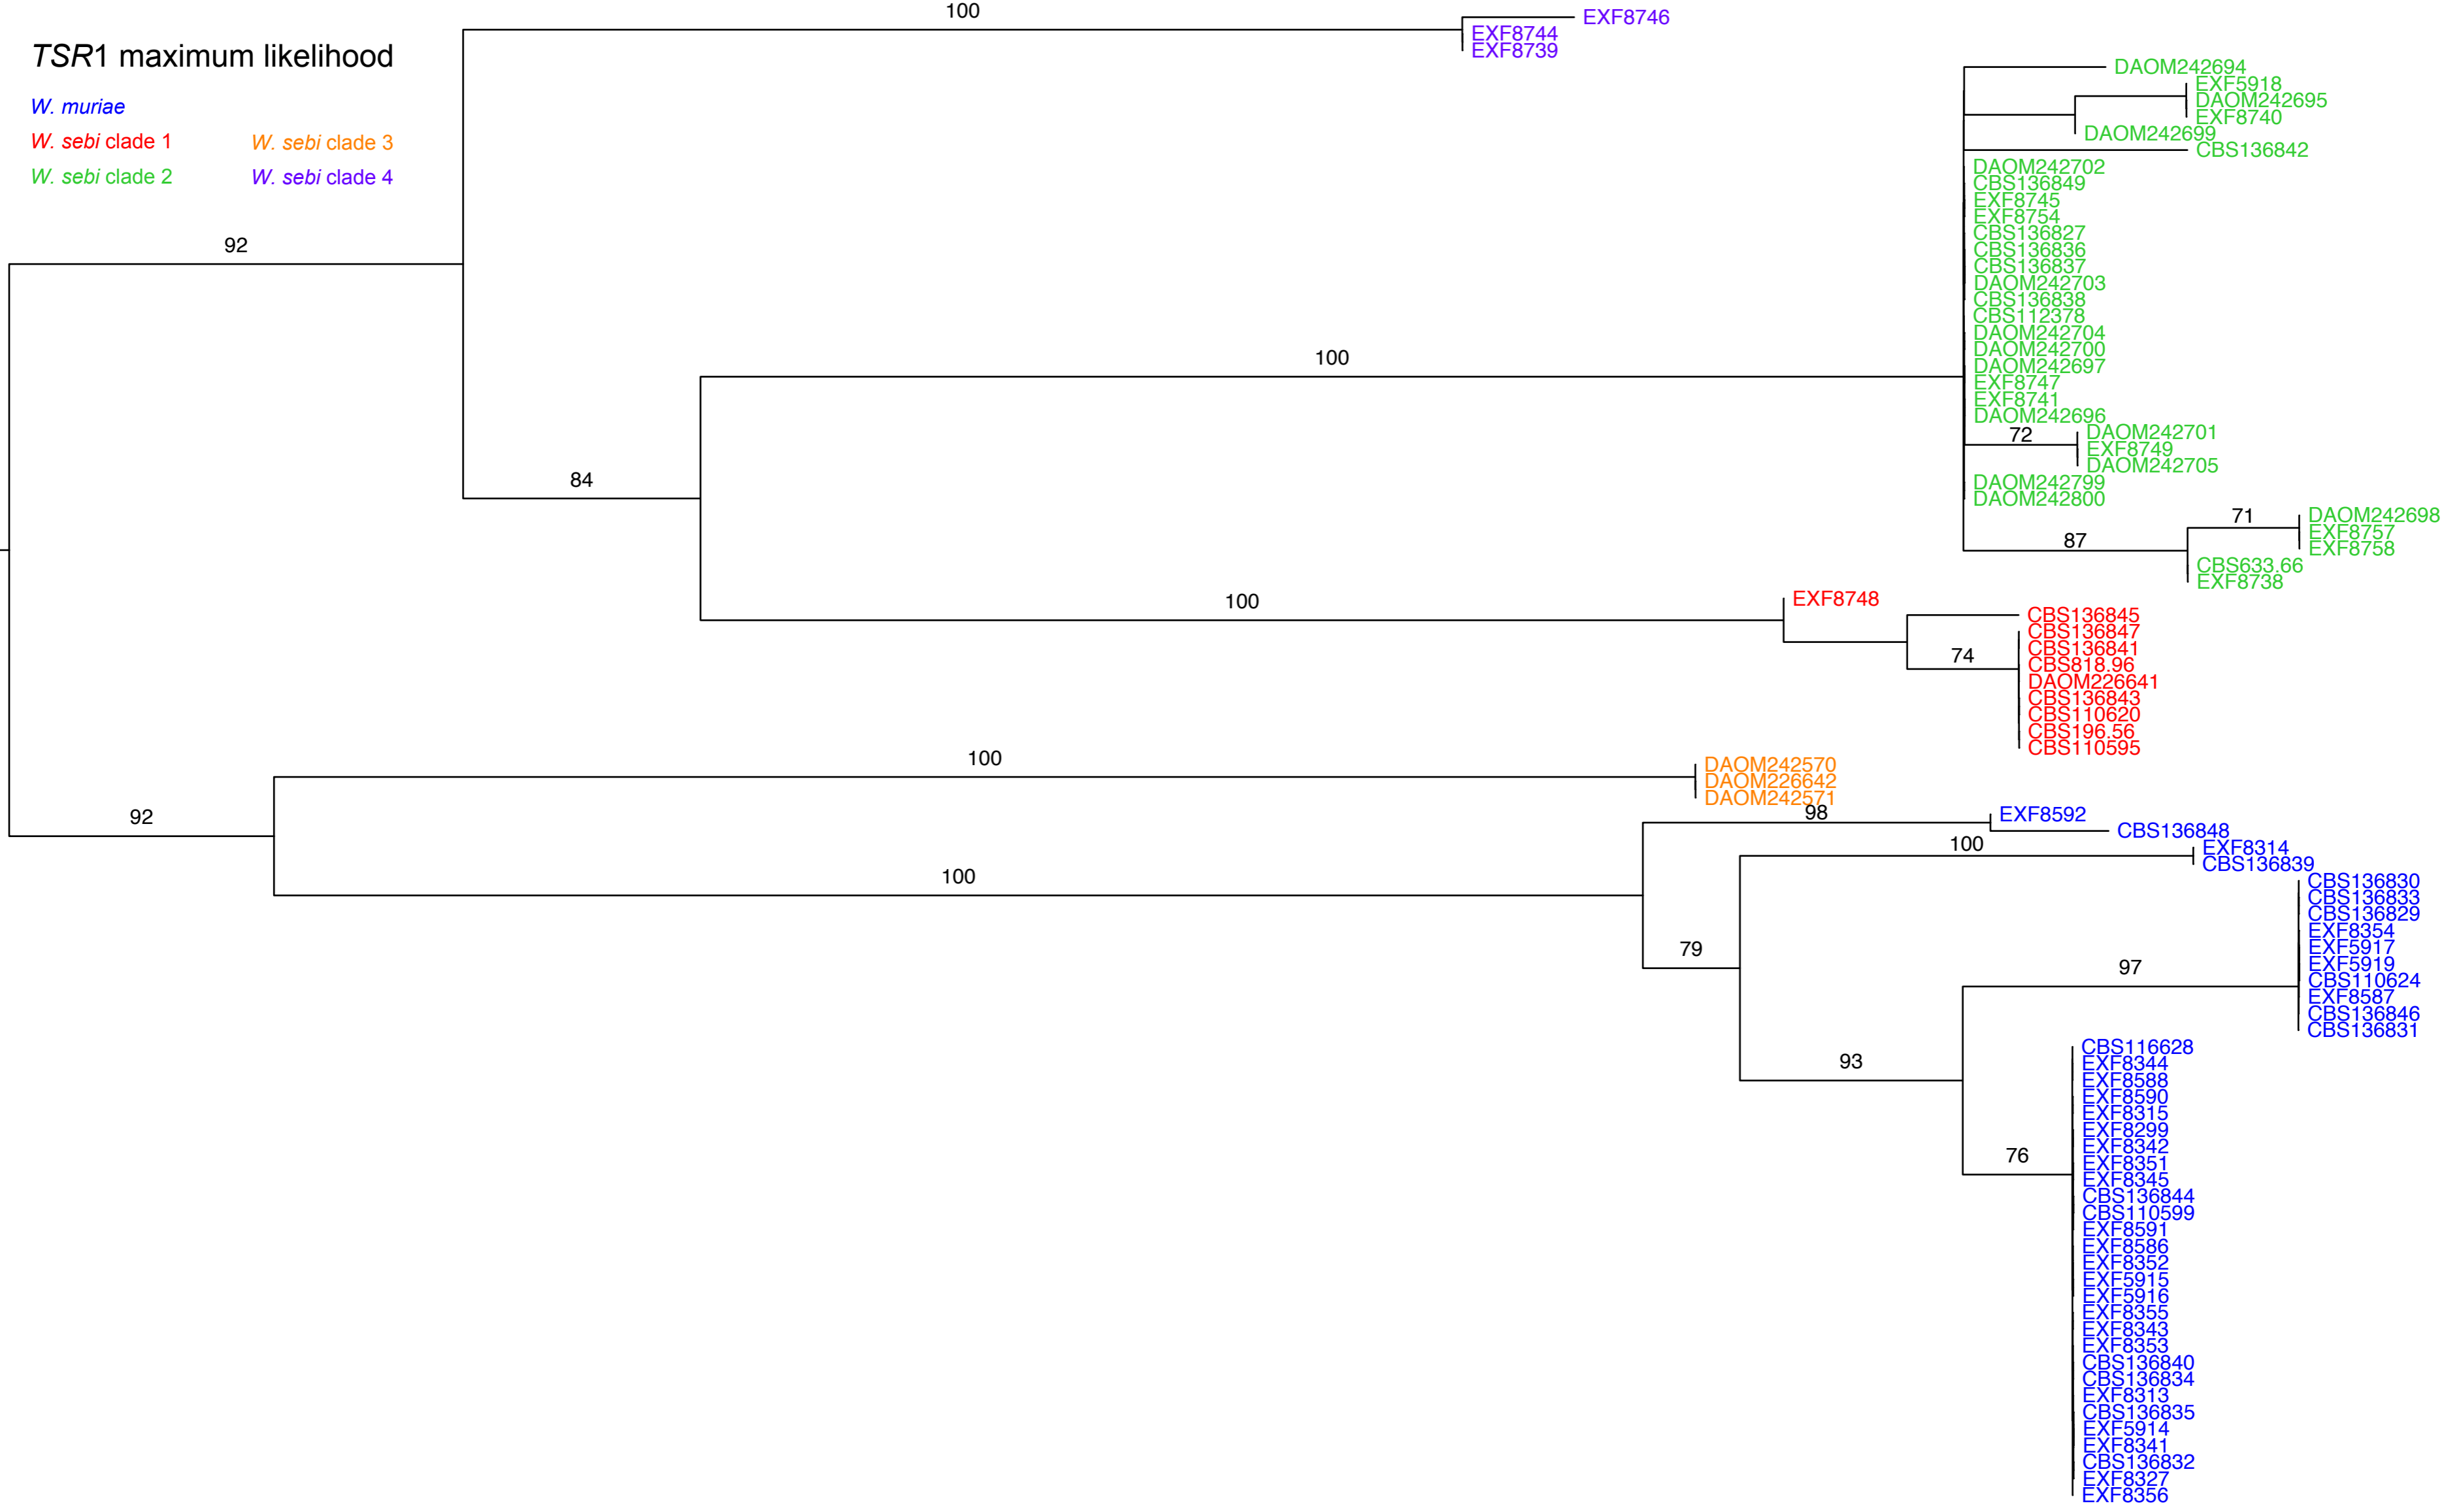

0.0070

# ITS Bayesian inference

*W. muriae*

*W. sebi* clade 1

*W. sebi* clade 2

*W. sebi* clade 3

*W. sebi* clade 4

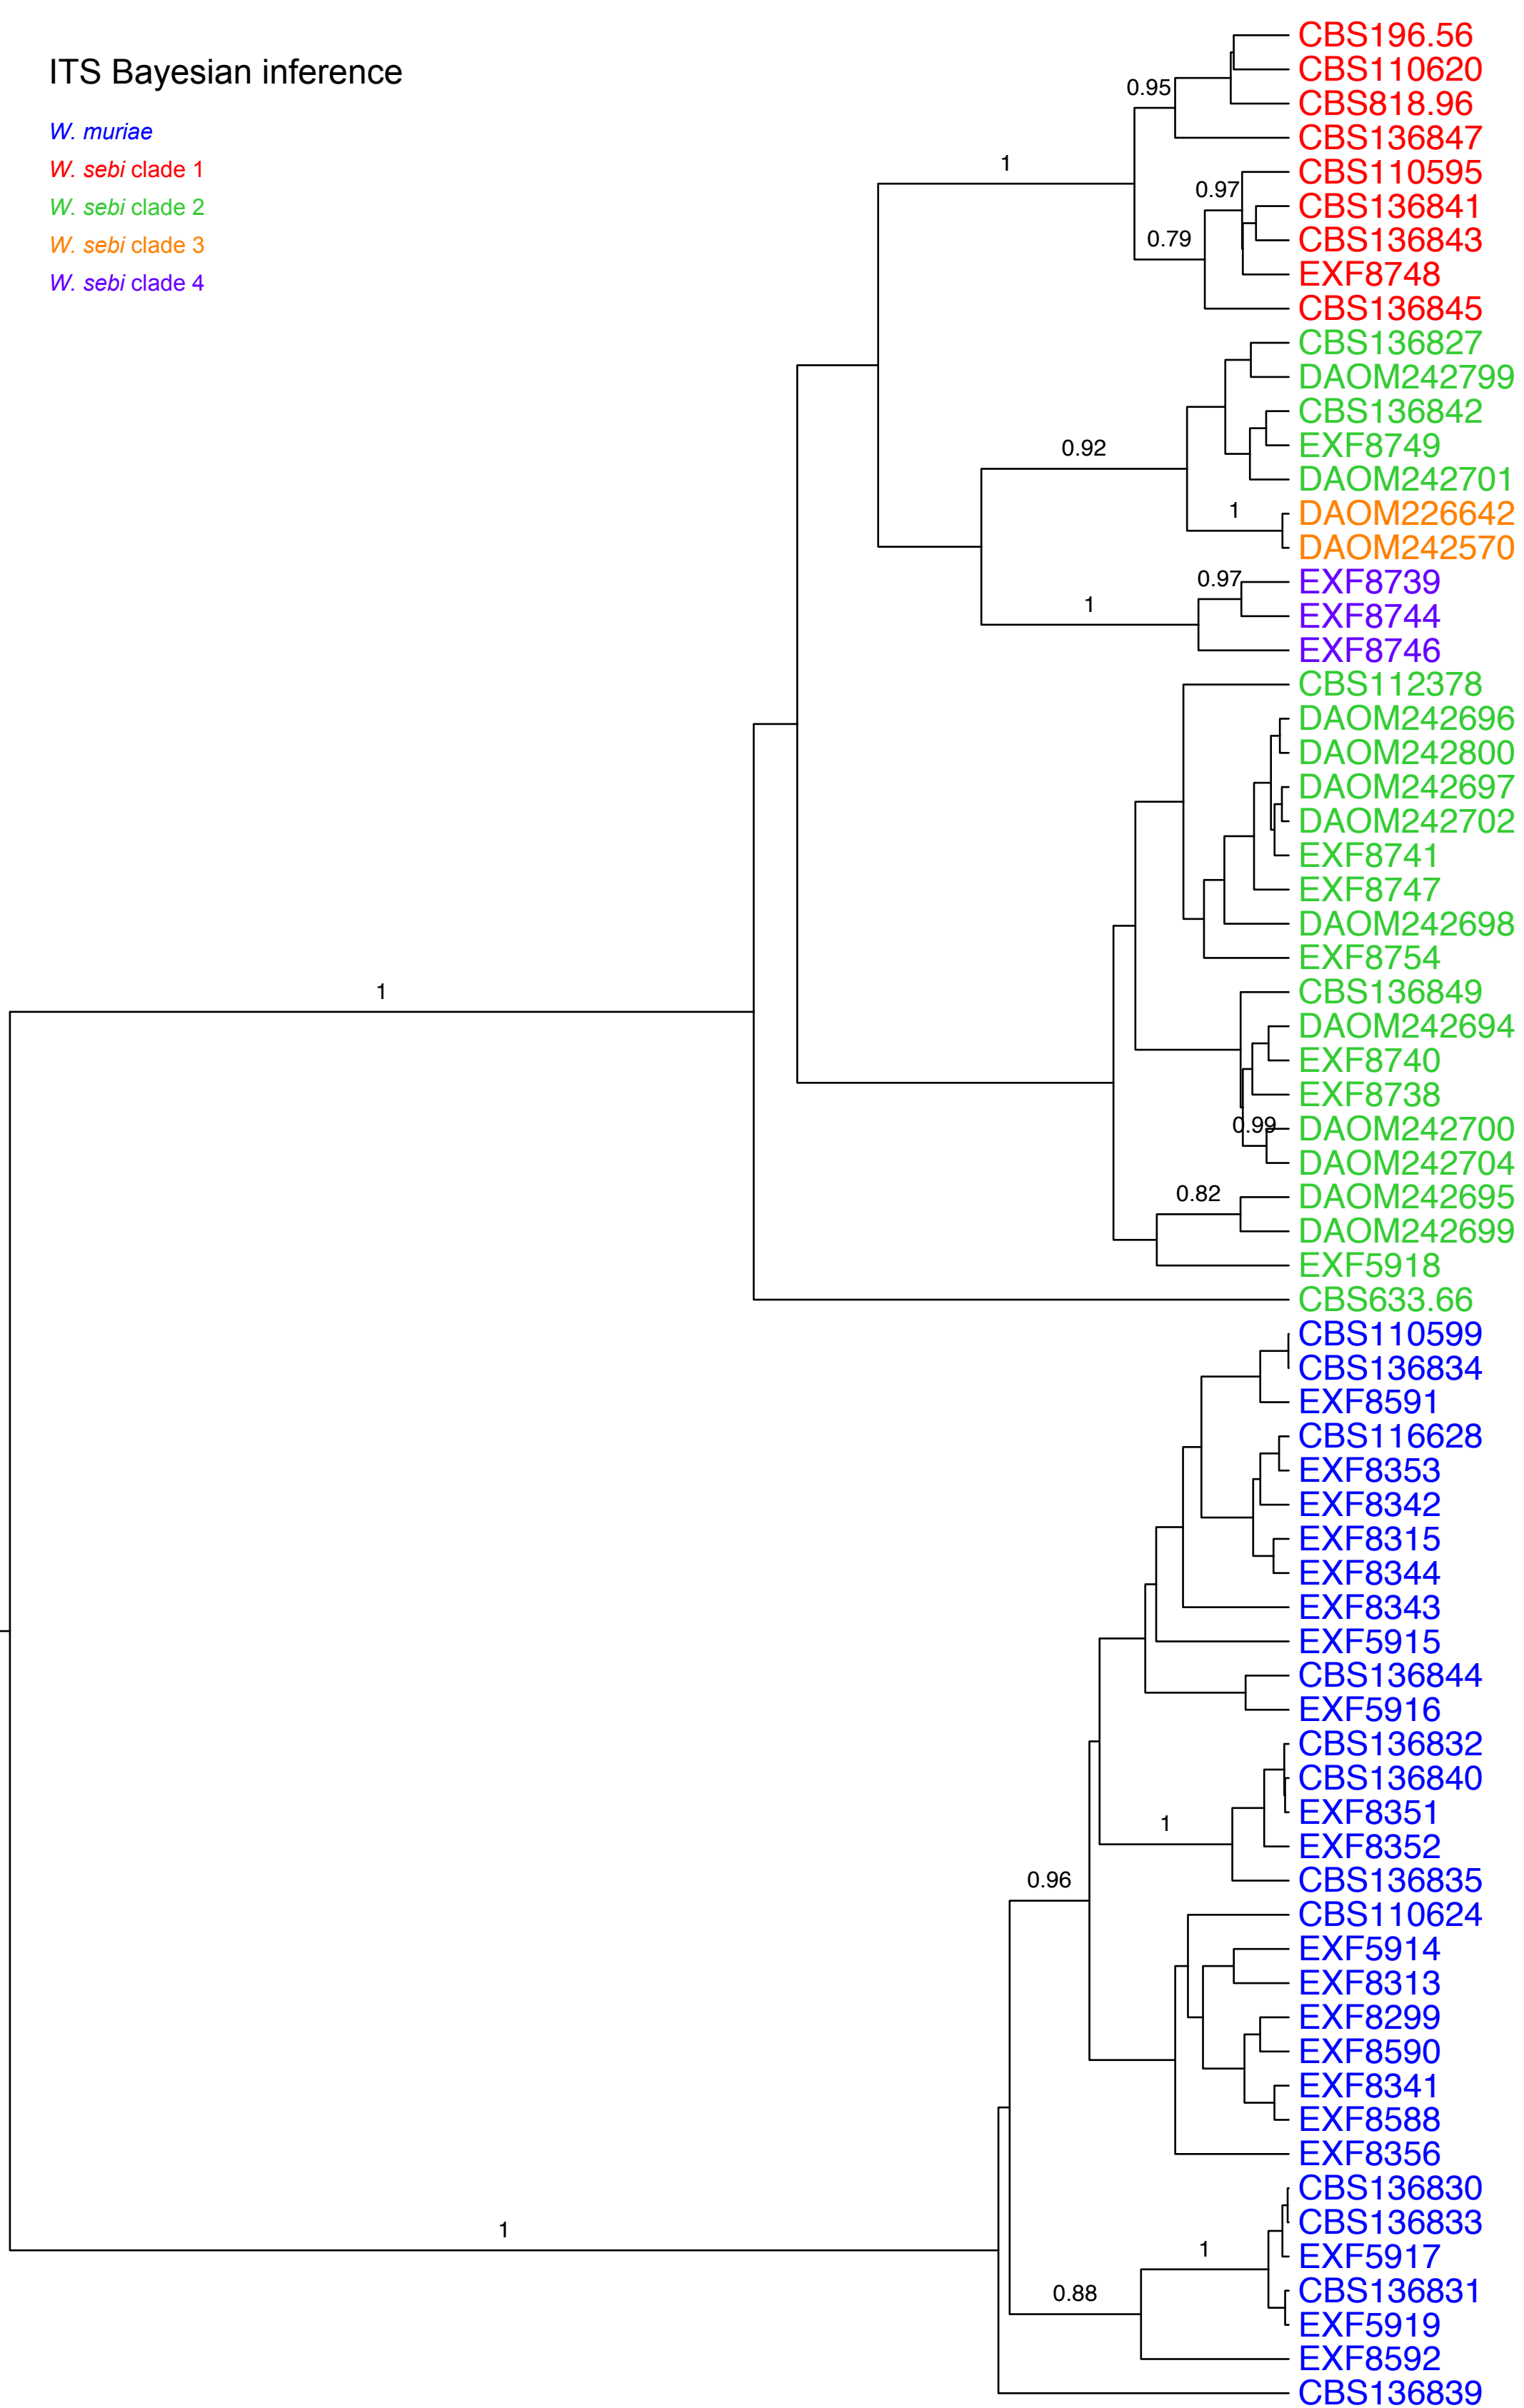



# MCM7 Bayesian inference

*W. muriae*

*W. sebi* clade 1

*W. sebi* clade 2

*W. sebi* clade 3

*W. sebi* clade 4

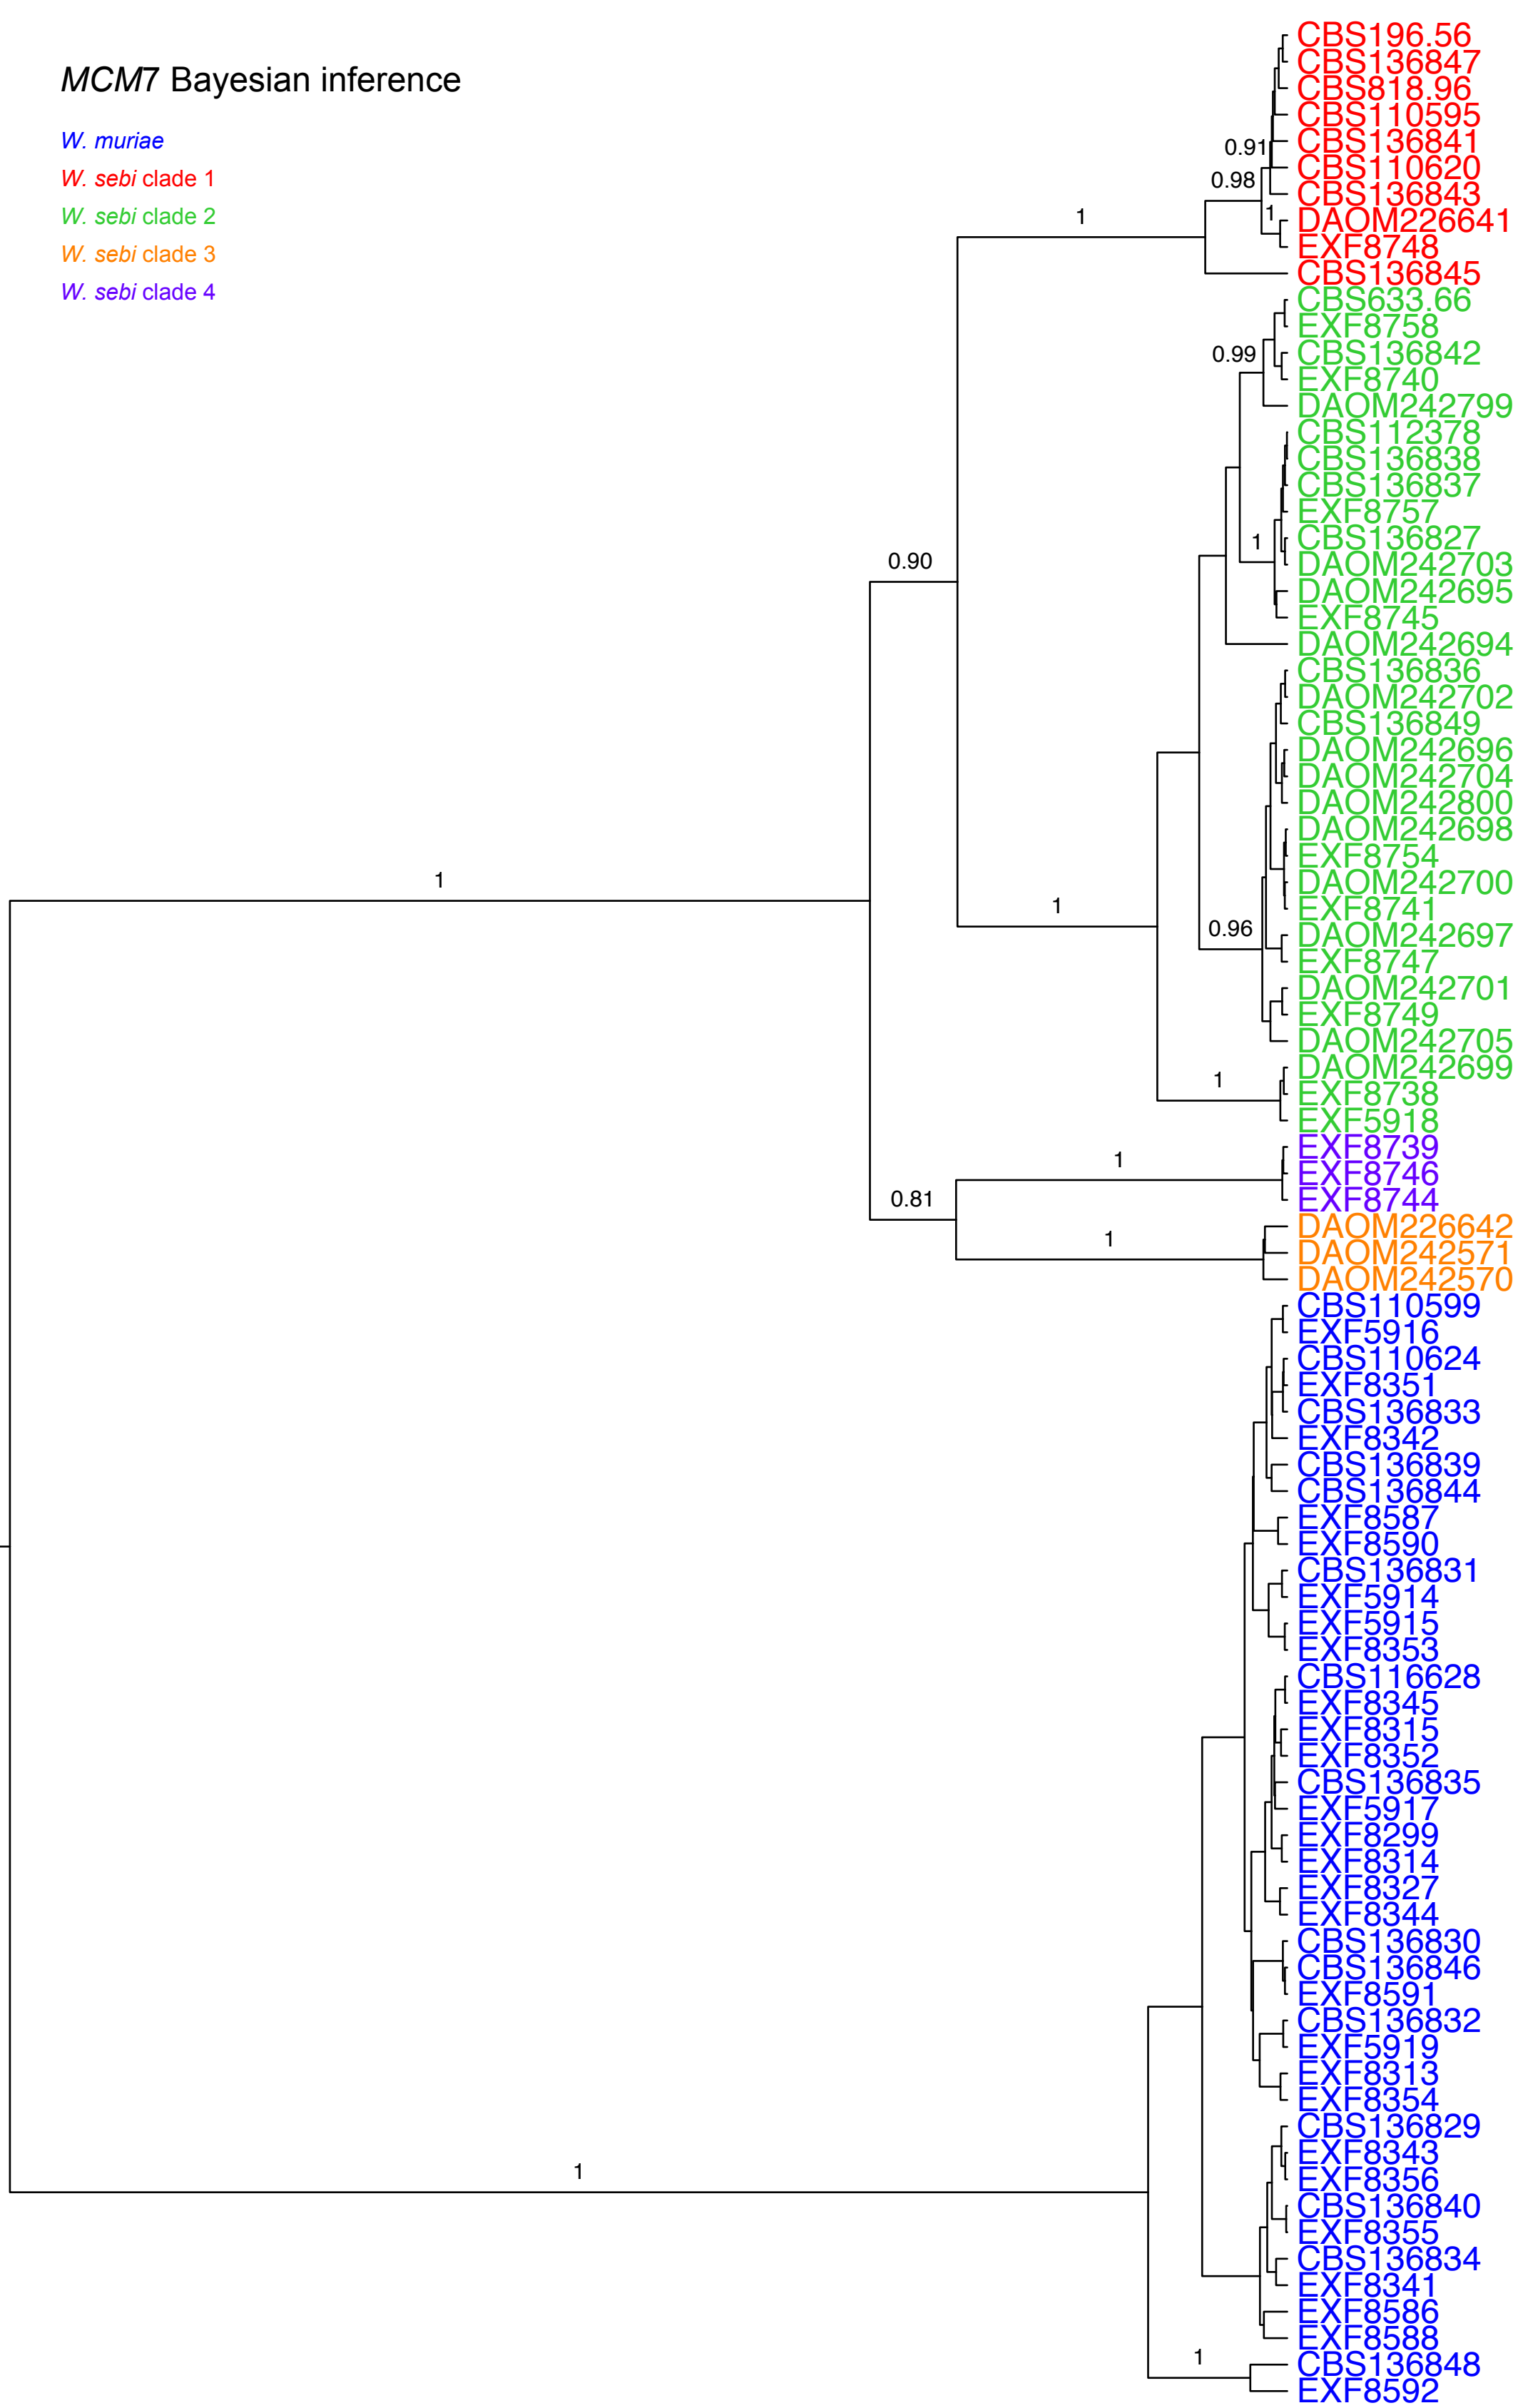

# RPB1 Bayesian inference

*W. muriae*

*W. sebi* clade 1

*W. sebi* clade 2

*W. sebi* clade 3

*W. sebi* clade 4

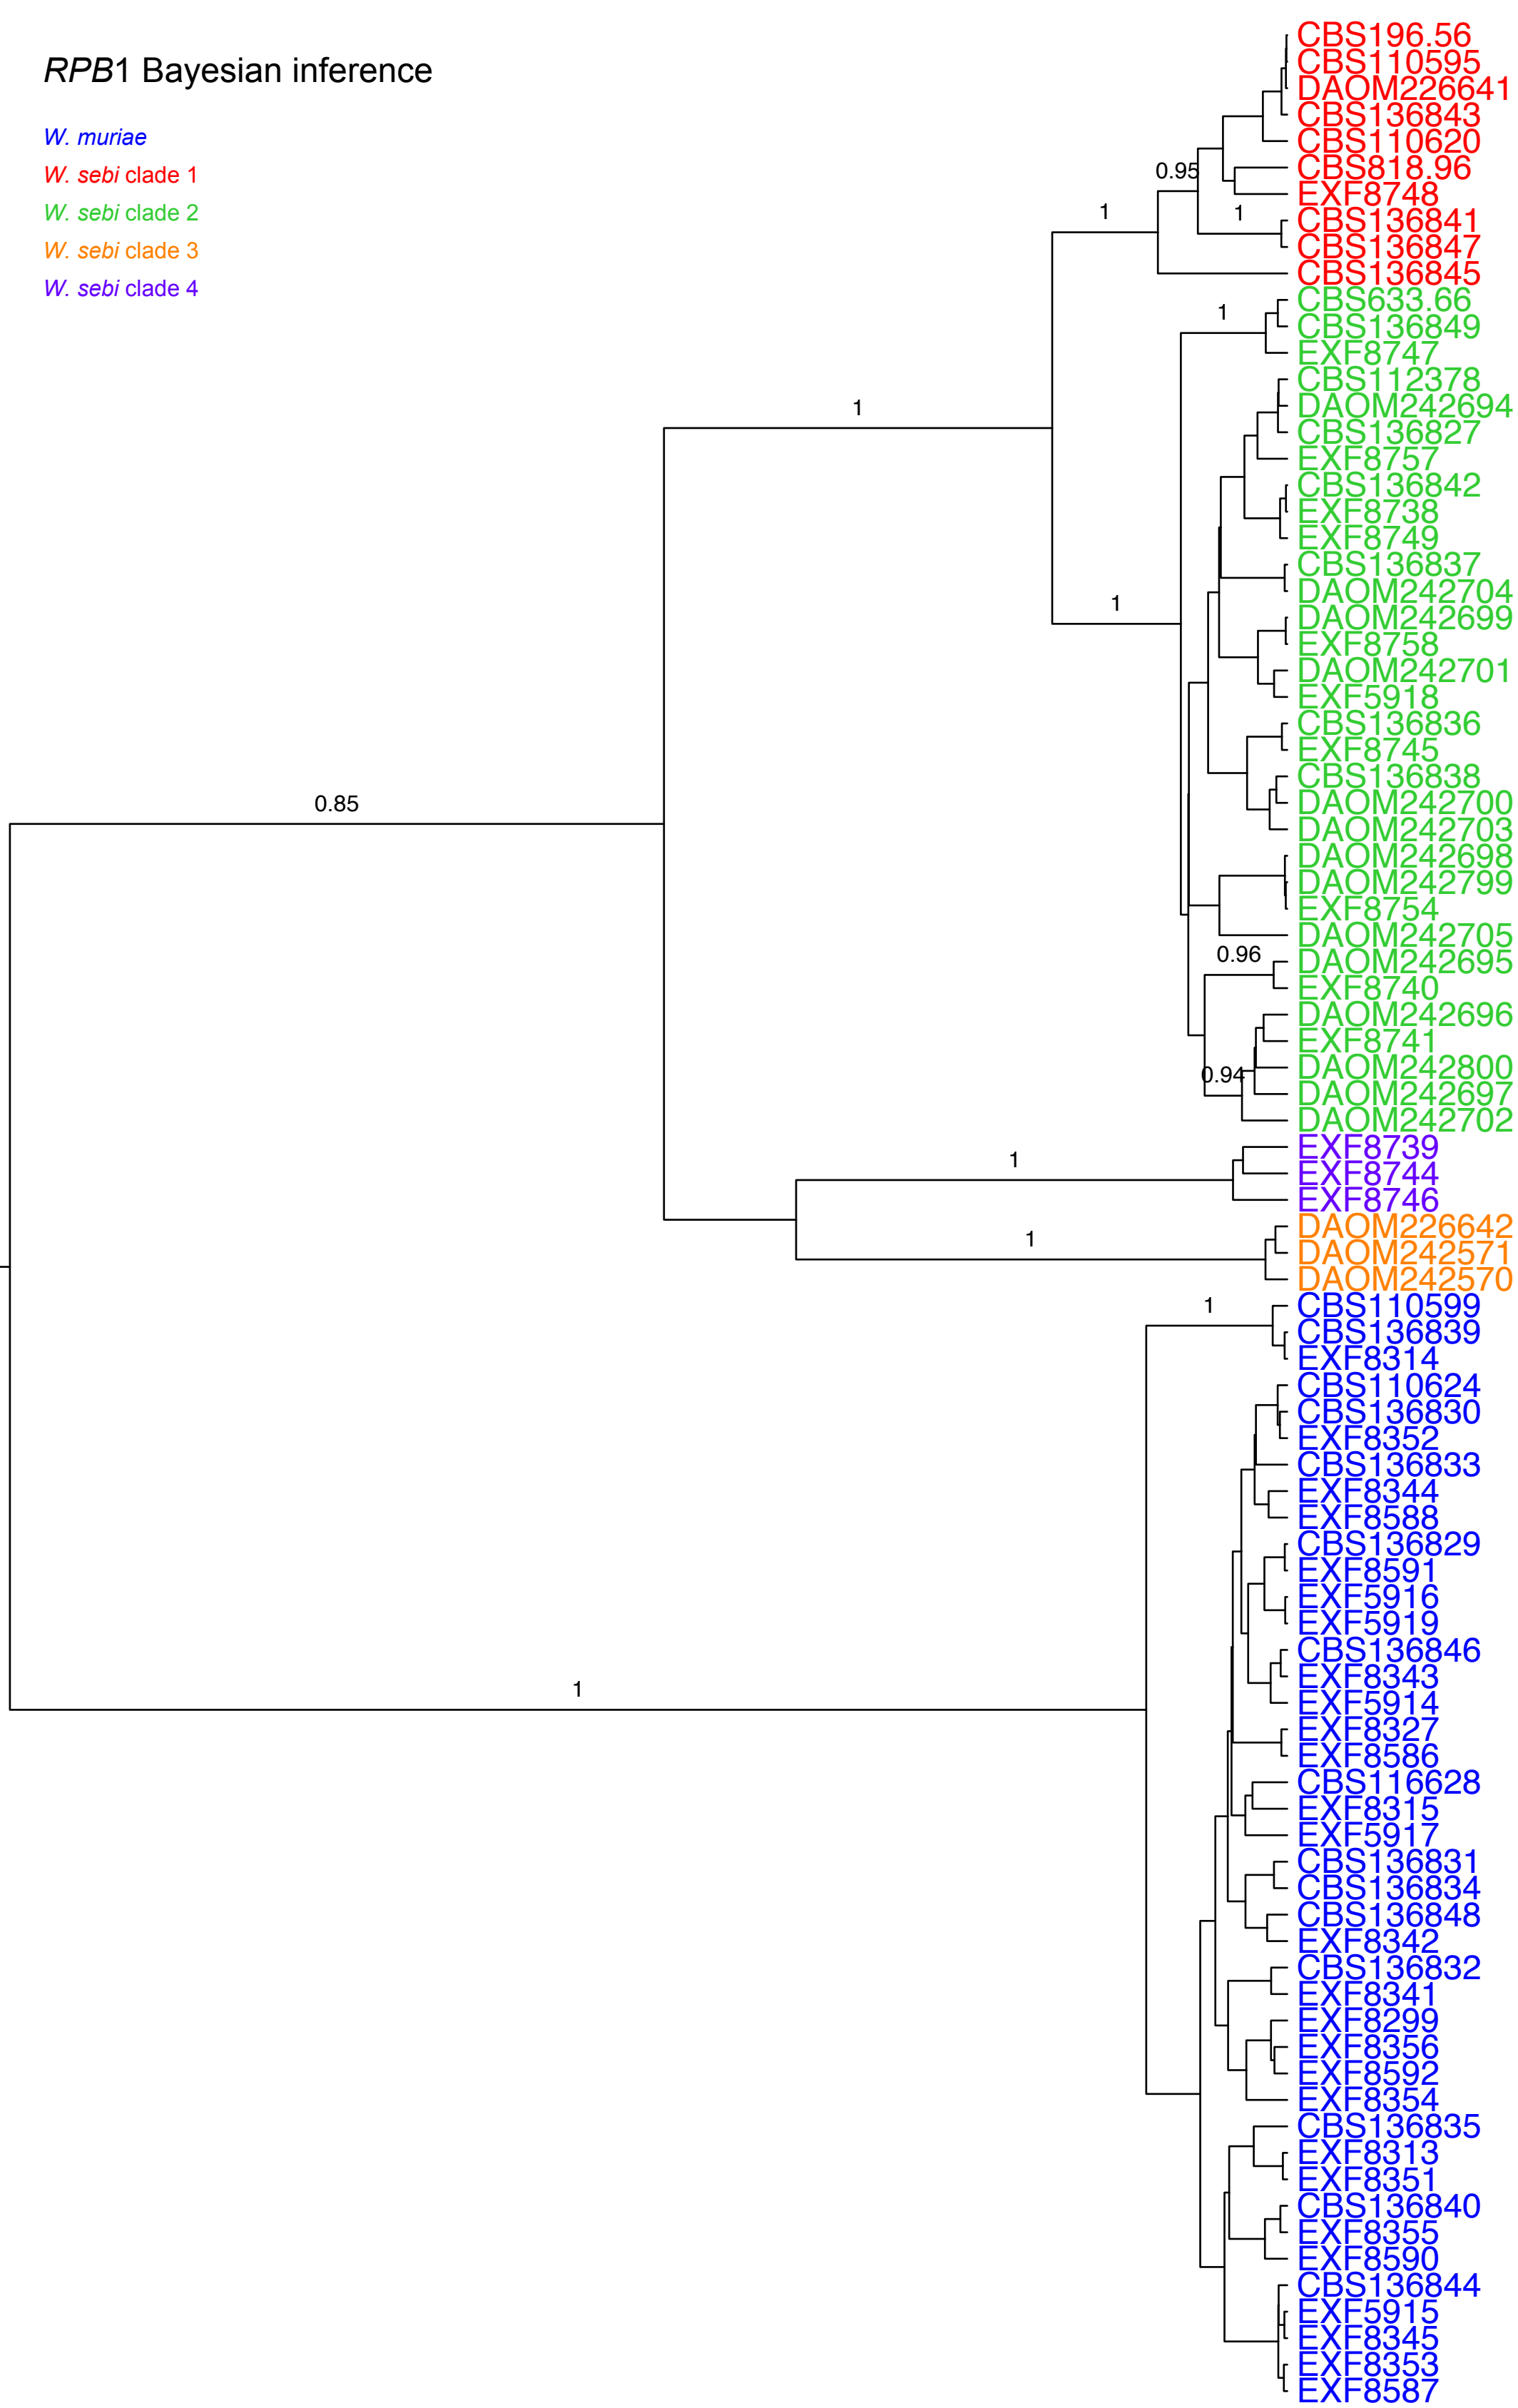



TSR1 Bayesian inference

*W. muriae*

*W. sebi* clade 1

*W. sebi* clade 2

*W. sebi* clade 3

*W. sebi* clade 4

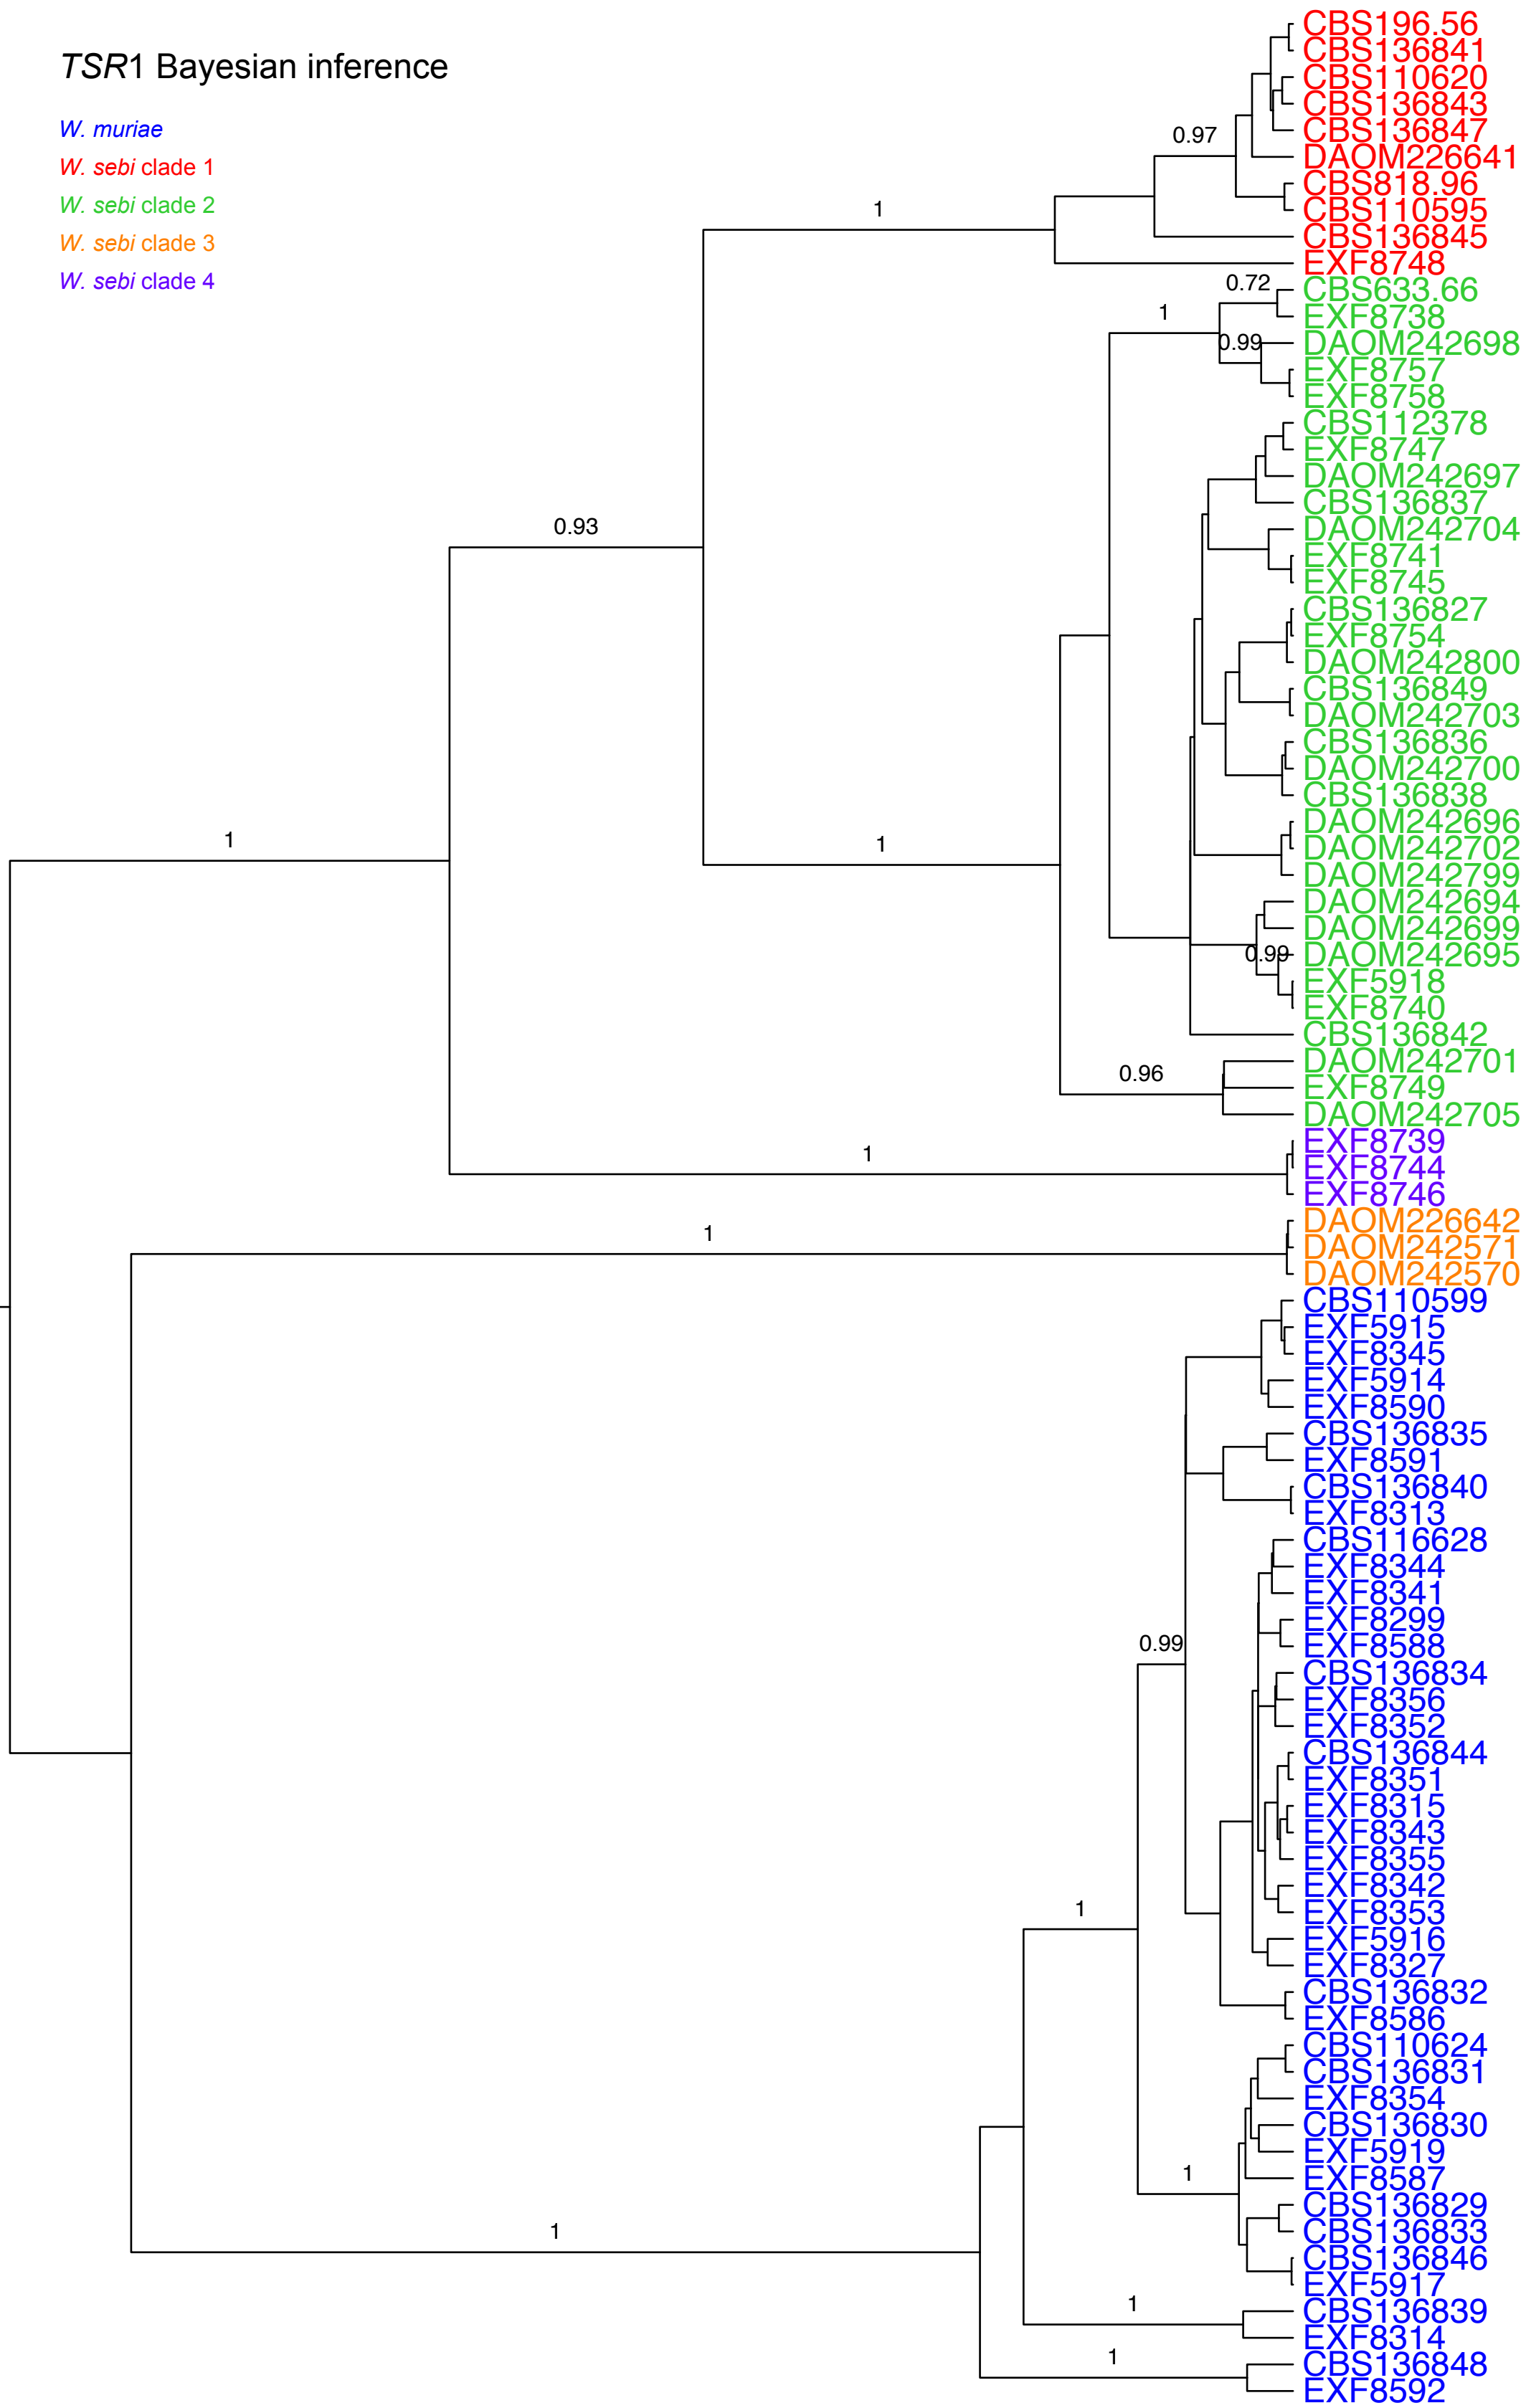

3.0
