# Supplementary material for: Application of the Phylogenetic Species Concept to Wallemia sebi from House Dust and Indoor Air Revealed by Multi-Locus Genealogical Concordance
Source: PLoS One. 2015 Mar 23;10(3):e0120894. doi: 10.1371/journal.pone.0120894 (PMC4370657; doi:10.1371/journal.pone.0120894)
Supplement: S1 Table — Sequences for MCM7, TSR1, RPB1 and RPB2 from strain CBS 633.66 were extracted from the Joint Genome Institute (JGI) MycoCosm site. (XLSX) [file pone.0120894.s001.xlsx]

## Sheet: Wallemia short list (4)
Table S1. Strain information and GenBank accession numbers. Sequences for MCM7, TSR1, RPB1 and RPB2 from strain CBS 633.66 were extracted from the Joint Genome Institute (JGI) MycoCosm site.
Strain Numbera	Genus	Species	Clade	Country	City	Isolation source	Type of location	Isolation method	ITSb	MCM7	TSR1	RPB1	RPB2
CBS 818.96T	Wallemia	sebi	1	Sweden	unknown	Sunflower seed	N/A. Zalar et al. (2005) [3]	unknown	AY328915	KM034937	KM035026	KM035115	KM035204
DAOM 226641	Wallemia	sebi	1	Canada	Ottawa	Indoor of residence	Private residence	Air sample	—	KM034935	KM035024	KM035113	KM035202
EXF 8748	Wallemia	sebi	1	South Africa	Stellenbosch	Office dust	Private office	Dilution to extinction	KJ409896	KM034956	KM035045	KM035134	KM035223
CBS 136841	Wallemia	sebi	1	Germany	Berlin	Indoor environment	unknown	Air sample	KJ409907	KM034972	KM035061	KM035150	KM035239
CBS 136843	Wallemia	sebi	1	The Netherlands	Hoornaar	Archive	Private company	Swab	KJ409909	KM034974	KM035063	KM035152	KM035240
CBS 136845	Wallemia	sebi	1	The Netherlands	Zutphen	Office building	Private company	Swab	KJ409911	KM034976	KM035065	KM035154	KM035242
CBS 136847	Wallemia	sebi	1	The Netherlands	Ospel	Boiled eggs plant	Private factory	Air sample	KJ409913	KM034978	KM035067	KM035156	KM035244
CBS 196.56c	Wallemia	sebi	1	The Netherlands	Groningen	Chronic ulcerative skin lesion	N/A. Zalar et al. (2005) [3]	unknown	KJ409916	KM034983	KM035072	KM035161	KM035249
CBS 110595	Wallemia	sebi	1	United Kingdom	Surrey	Domestic interior	Private residence	unknown	AY302511	KM034984	KM035073	KM035162	KM035250
CBS 110620	Wallemia	sebi	1	United Kingdom	Surrey	Domestic interior	Private residence	unknown	AY302515	KM034985	KM035074	KM035163	KM035251
CBS 633.66d	Wallemia	sebi	2	unknown	unknown	Date honey	N/A. Padamsee et al. (2012) [8]	unknown	AY328916	JGI	JGI	JGI	JGI
EXF 8738	Wallemia	sebi	2	Uruguay	Montevideo	House dust	Private residence	Dilution to extinction	KJ409875	KM034931	KM035020	KM035109	KM035198
DAOM 242694	Wallemia	sebi	2	Uruguay	Montevideo	House dust	Private residence	Dilution to extinction	KJ409876	KM034932	KM035021	KM035110	KM035199
DAOM 242799	Wallemia	sebi	2	Uruguay	Montevideo	House dust	Private residence	Dilution to extinction	KJ409877	KM034933	KM035022	KM035111	KM035200
EXF 8740	Wallemia	sebi	2	Micronesia	Malem	Dust in house A	Private residence	Dilution to extinction	KJ409881	KM034939	KM035028	KM035117	KM035206
DAOM 242695	Wallemia	sebi	2	Micronesia	Malem	Dust in house A	Private residence	Dilution to extinction	KJ409882	KM034940	KM035029	KM035118	KM035207
EXF 8741	Wallemia	sebi	2	Micronesia	Malem	Dust in house A	Private residence	Dilution to extinction	KJ409883	KM034941	KM035030	KM035119	KM035208
DAOM 242696	Wallemia	sebi	2	Micronesia	Malem	Dust in house A	Private residence	Dilution to extinction	KJ409884	KM034942	KM035031	KM035120	KM035209
DAOM 242800	Wallemia	sebi	2	Micronesia	Malem	Dust in house B	Private residence	Dilution to extinction	KJ409885	KM034943	KM035032	KM035121	KM035210
DAOM 242697	Wallemia	sebi	2	Micronesia	Malem	Dust in house A	Private residence	Dilution to extinction	KJ409886	KM034944	KM035033	KM035122	KM035211
DAOM 242702	Wallemia	sebi	2	Micronesia	Malem	Dust in house B	Private residence	Dilution to extinction	KJ409887	KM034945	KM035034	KM035123	KM035212
EXF 8745	Wallemia	sebi	2	Micronesia	Tofol	Dust in association office	Private office	Dilution to extinction	—	KM034946	KM035035	KM035124	KM035213
DAOM 242703	Wallemia	sebi	2	Micronesia	Tofol	Dust in association office	Private office	Dilution to extinction	—	KM034948	KM035037	KM035126	KM035215
DAOM 242698	Wallemia	sebi	2	Uruguay	Montevideo	House dust	Private residence	Dilution to extinction	KJ409889	KM034949	KM035038	KM035127	KM035216
DAOM 242699	Wallemia	sebi	2	Uruguay	Montevideo	House dust	Private residence	Dilution to extinction	KJ409890	KM034950	KM035039	KM035128	KM035217
DAOM 242700	Wallemia	sebi	2	Indonesia	Yogyakarta	House dust	Private residence	Dilution to extinction	KJ409892	KM034952	KM035041	KM035130	KM035219
DAOM 242701	Wallemia	sebi	2	Indonesia	Yogyakarta	House dust	Private residence	Dilution to extinction	KJ409893	KM034953	KM035042	KM035131	KM035220
DAOM 242704	Wallemia	sebi	2	Indonesia	Yogyakarta	House dust	Private residence	Dilution to extinction	KJ409894	KM034954	KM035043	KM035132	KM035221
EXF 8747	Wallemia	sebi	2	Indonesia	Yogyakarta	House dust	Private residence	Dilution to extinction	KJ409895	KM034955	KM035044	KM035133	KM035222
EXF 8749	Wallemia	sebi	2	Thailand	Makham Tia	Dust in apartment	Private residence	Dilution to extinction	KJ409897	KM034957	KM035046	KM035135	KM035224
DAOM 242705	Wallemia	sebi	2	Thailand	Makham Tia	Dust in apartment	Private residence	Dilution to extinction	—	KM034958	KM035047	KM035136	KM035225
CBS 136827	Wallemia	sebi	2	Germany	unknown	Indoor environment	unknown	Air sample	KJ409898	KM034959	KM035048	KM035137	KM035226
CBS 136836	Wallemia	sebi	2	The Netherlands	Rijswijk	Archive	Private company	Swab	—	KM034967	KM035056	KM035145	KM035234
CBS 136837	Wallemia	sebi	2	The Netherlands	Amsterdam	Bat cage	Public zoo	Air sample	—	KM034968	KM035057	KM035146	KM035235
CBS 136838	Wallemia	sebi	2	Germany	Stuttgart	Indoor environment	unknown	Air sample	—	KM034969	KM035058	KM035147	KM035236
CBS 136842	Wallemia	sebi	2	Germany	Stuttgart	Indoor environment	unknown	Air sample	KJ409908	KM034973	KM035062	KM035151	—
CBS 136849	Wallemia	sebi	2	Thailand	Songkla	Indoor environment	Private residence	Air sample	KJ409914	KM034981	KM035070	KM035159	KM035247
EXF 8754c	Wallemia	sebi	2	India	Varanasi	Subcutaneous lesion on foot	N/A. Guarro et al. (2008) [25]	Scraping	KJ409915	KM034982	KM035071	KM035160	KM035248
CBS 112378	Wallemia	sebi	2	Germany	Stuttgart	Indoor environment	unknown	Air sample	KJ409917	KM034987	KM035076	KM035165	KM035253
EXF 8757	Wallemia	sebi	2	Mexico	Sayulita	Dust in rental studio	Private residence	Dilution to extinction	—	KM034989	KM035078	KM035167	KM035255
EXF 8758	Wallemia	sebi	2	Mexico	Sayulita	Dust in rental studio	Private residence	Dilution to extinction	—	KM034990	KM035079	KM035168	KM035256
EXF 5918	Wallemia	sebi	2	Slovenia	Kamnik	Ceiling in children's room	Private residence	Swab	KJ494632	KM034999	KM035088	KM035177	—
DAOM 226642e	Wallemia	sebi	3	Canada	Ottawa	Indoor of residence	Private residence	Air sample	KJ409879	KM034936	KM035025	KM035114	KM035203
DAOM 242571	Wallemia	sebi	3	Canada	Ottawa	Indoor environment	Private residence	Air sample	—	KM034988	KM035077	KM035166	KM035254
DAOM 242570	Wallemia	sebi	3	Canada	Ottawa	Indoor environment	Private residence	Air sample	KJ409918	KM034991	KM035080	KM035169	KM035257
EXF 8739	Wallemia	sebi	4	Uruguay	Montevideo	House dust	Private residence	Dilution to extinction	KJ409878	KM034934	KM035023	KM035112	KM035201
EXF 8746	Wallemia	sebi	4	Micronesia	Tofol	Dust in association office	Private office	Dilution to extinction	KJ409888	KM034947	KM035036	KM035125	KM035214
EXF 8744	Wallemia	sebi	4	Indonesia	Yogyakarta	House dust	Private residence	Dilution to extinction	KJ409891	KM034951	KM035040	KM035129	KM035218
CBS 116628T	Wallemia	muriae	—	Slovenia	unknown	Hypersaline water of saltern	N/A. Zalar et al. (2005) [3]	unknown	KJ409880	KM034938	KM035027	KM035116	KM035205
CBS 136829	Wallemia	muriae	—	The Netherlands	Amsterdam	Archive in justice department	Private company	Air sample	—	KM034960	KM035049	KM035138	KM035227
CBS 136830	Wallemia	muriae	—	The Netherlands	Tilburg	Moist wall of archive	Private company	Swab	KJ409899	KM034961	KM035050	KM035139	KM035228
CBS 136831	Wallemia	muriae	—	The Netherlands	Tiel	Directly from wallpaper	Private residence	Swab	KJ409900	KM034962	KM035051	KM035140	KM035229
CBS 136832	Wallemia	muriae	—	The Netherlands	Gorinchem	Archive	Private company	Swab	KJ409901	KM034963	KM035052	KM035141	KM035230
CBS 136833	Wallemia	muriae	—	The Netherlands	Utrecht	Directly from filter flowcabinet	Private office	Swab	KJ409902	KM034964	KM035053	KM035142	KM035231
CBS 136834	Wallemia	muriae	—	The Netherlands	Eindhoven	Bedroom	Private residence	Air sample	KJ409903	KM034965	KM035054	KM035143	KM035232
CBS 136835	Wallemia	muriae	—	The Netherlands	Eindhoven	Bathroom	Private residence	Air sample	KJ409904	KM034966	KM035055	KM035144	KM035233
CBS 136839	Wallemia	muriae	—	Germany	Cologne	Indoor environment	unknown	Air sample	KJ409905	KM034970	KM035059	KM035148	KM035237
CBS 136840	Wallemia	muriae	—	Germany	Berlin	Indoor environment	unknown	Air sample	KJ409906	KM034971	KM035060	KM035149	KM035238
CBS 136844	Wallemia	muriae	—	The Netherlands	Zutphen	Office building	Private company	Air sample	KJ409910	KM034975	KM035064	KM035153	KM035241
CBS 136846	Wallemia	muriae	—	The Netherlands	Ospel	Boiled eggs plant	Private factory	Air sample	—	KM034977	KM035066	KM035155	KM035243
CBS 110599	Wallemia	muriae	—	United Kingdom	Surrey	Interior of unoccupied house	Private residence	unknown	AY863021	KM034979	KM035068	KM035157	KM035245
CBS 136848	Wallemia	muriae	—	The Netherlands	Born	Cheese factory	Private factory	Air sample	—	KM034980	KM035069	KM035158	KM035246
CBS 110624	Wallemia	muriae	—	United Kingdom	Surrey	Interior of unoccupied house	Private residence	unknown	AY863022	KM034986	KM035075	KM035164	KM035252
EXF 8592	Wallemia	muriae	—	Denmark	Lyngby	Living room	Private residence	Air sample	KJ409919	KM034992	KM035081	KM035170	KM035258
EXF 8591	Wallemia	muriae	—	Denmark	Lyngby	Living room	Private residence	Air sample	KJ409920	KM034993	KM035082	KM035171	KM035259
EXF 8590	Wallemia	muriae	—	Denmark	Lyngby	Living room	Private residence	Air sample	KJ409921	KM034994	KM035083	KM035172	KM035260
EXF 8588	Wallemia	muriae	—	Denmark	Lyngby	Living room	Private residence	Air sample	KJ409922	KM034995	KM035084	KM035173	KM035261
EXF 8587	Wallemia	muriae	—	Denmark	Lyngby	Living room	Private residence	Air sample	—	KM034996	KM035085	KM035174	KM035262
EXF 8586	Wallemia	muriae	—	Denmark	Lyngby	Living room	Private residence	Air sample	—	KM034997	KM035086	KM035175	KM035263
EXF 5919	Wallemia	muriae	—	Slovenia	Kamnik	Ceiling in children's room	Private residence	Swab	KJ494614	KM034998	KM035087	KM035176	KM035264
EXF 5917	Wallemia	muriae	—	Slovenia	Kamnik	Ceiling in children's room	Private residence	Swab	KJ494613	KM035000	KM035089	KM035178	—
EXF 5916	Wallemia	muriae	—	Slovenia	Ljubljana	Kitchen wall	Private residence	Swab	KJ494594	KM035001	KM035090	KM035179	KM035265
EXF 5915	Wallemia	muriae	—	Slovenia	Vrhnika	Living room wall	Private residence	Swab	KJ494593	KM035002	KM035091	KM035180	KM035266
EXF 5914	Wallemia	muriae	—	Slovenia	Radomlje	Kitchen wall	Private residence	Swab	KJ494611	KM035003	KM035092	KM035181	KM035267
EXF 8356	Wallemia	muriae	—	Slovenia	Lasko	Furnace room	Private residence	Air sample	KJ409929	KM035004	KM035093	KM035182	KM035268
EXF 8355	Wallemia	muriae	—	Slovenia	Lasko	Furnace room	Private residence	Air sample	—	KM035005	KM035094	KM035183	KM035269
EXF 8354	Wallemia	muriae	—	Slovenia	Lasko	Furnace room	Private residence	Air sample	—	KM035006	KM035095	KM035184	KM035270
EXF 8353	Wallemia	muriae	—	Slovenia	Lasko	Basement	Private residence	Air sample	KJ409930	KM035007	KM035096	KM035185	—
EXF 8352	Wallemia	muriae	—	Slovenia	Lasko	Basement	Private residence	Air sample	KJ409931	KM035008	KM035097	KM035186	—
EXF 8351	Wallemia	muriae	—	Slovenia	Lasko	Basement	Private residence	Air sample	KJ409932	KM035009	KM035098	KM035187	KM035271
EXF 8345	Wallemia	muriae	—	Slovenia	Radovljica	Living room	Private residence	Air sample	—	KM035010	KM035099	KM035188	KM035272
EXF 8344	Wallemia	muriae	—	Slovenia	Radovljica	Living room	Private residence	Air sample	KJ409933	KM035011	KM035100	KM035189	KM035273
EXF 8343	Wallemia	muriae	—	Slovenia	Radovljica	Living room	Private residence	Air sample	KJ409934	KM035012	KM035101	KM035190	KM035274
EXF 8342	Wallemia	muriae	—	Slovenia	Radovljica	Bedroom	Private residence	Air sample	KJ409935	KM035013	KM035102	KM035191	KM035275
EXF 8341	Wallemia	muriae	—	Slovenia	Radovljica	Bedroom	Private residence	Air sample	KJ409936	KM035014	KM035103	KM035192	KM035276
EXF 8327	Wallemia	muriae	—	Slovenia	Lasko	Kitchen	Private residence	Air sample	—	KM035015	KM035104	KM035193	KM035277
EXF 8315	Wallemia	muriae	—	Slovenia	Ljubljana	Kitchen	Private residence	Air sample	KJ409937	KM035016	KM035105	KM035194	KM035278
EXF 8314	Wallemia	muriae	—	Slovenia	Ljubljana	Kitchen	Private residence	Air sample	—	KM035017	KM035106	KM035195	KM035279
EXF 8313	Wallemia	muriae	—	Slovenia	Ljubljana	Kitchen	Private residence	Air sample	KJ409938	KM035018	KM035107	KM035196	KM035280
EXF 8299	Wallemia	muriae	—	Slovenia	Ljubljana	Bathroom	Private residence	Air sample	KJ409939	KM035019	KM035108	KM035197	KM035281
a: CBS = CBS-KNAW Fungal Biodiversity Centre, Utrecht, the Netherlands
DAOM = Canadian Collection of Fungal Cultures, Agriculture and Agri-Food Canada, Ottawa, Canada
EXF = Ex Culture Collection of the Department of Biology, Biotechnical Faculty, University of Ljubljana in Ljubljana, Infrastructural Centre Mycosmo, MRIC UL, Ljubljana, Slovenia
b: GenBank accession numbers in orange are from the Zalar et al (2005) [3]
c: Strains reported to cause subcutaneous lesions. EXF 8754 = FMR 8645 from Guarro et al. (2008) [25]
d: This is the strain with its genome sequenced at the Joint Genome Institute (JGI), USA
e: Strain producing metabolites that react to human antibodies
T: neotype strains
