# Supplementary material for: Application of the Phylogenetic Species Concept to Wallemia sebi from House Dust and Indoor Air Revealed by Multi-Locus Genealogical Concordance
Source: PLoS One. 2015 Mar 23;10(3):e0120894. doi: 10.1371/journal.pone.0120894 (PMC4370657; doi:10.1371/journal.pone.0120894)
Supplement: S2 Table — (XLSX) [file pone.0120894.s002.xlsx]

## Sheet: Wallemia short list (4)
Table S2. Primer sequences.
Primer	Gene	Direction	Sequence (5’-3’)
ITS1a	ITS	Forward	TCCGTAGGTGAACCTGCGG
ITS4a	ITS	Reverse	TCCTCCGCTTATTGATATGC
MCM7WF	MCM7	Forward	AGAGCAATGAGGGCAGGTTT
MCM7WR	MCM7	Reverse	CGGCCAAGGAGAGGGTTAG
RPB1WF	RPB1	Forward	AAGACGAAGAGGCCAAGCAGT
RPB1WR	RPB1	Reverse	ACGCAAATAGACAATCGGAACCT
RPB2WF	RPB2	Forward	AAATCATTGAAAGYATYTGTGTTA
RPB2WR	RPB2	Reverse	CGAAGWGWTGCRGTGTATTT
TSR1WF	TSR1	Forward	AGATTAGATTTGGGTGGTCCTT
TSR1WR	TSR1	Reverse	ATTCCATAACACCRTCKGACATC
a: These primers were from White et al. (1990) [69]
