# Supplementary material for: Application of the Phylogenetic Species Concept to Wallemia sebi from House Dust and Indoor Air Revealed by Multi-Locus Genealogical Concordance
Source: PLoS One. 2015 Mar 23;10(3):e0120894. doi: 10.1371/journal.pone.0120894 (PMC4370657; doi:10.1371/journal.pone.0120894)
Supplement: S3 Table — (XLSX) [file pone.0120894.s003.xlsx]

## Sheet: Sheet1
Table S4. List of haplotypes.
Haplotype ID	Frequency	Clade No.	Strains number, Geography (Country & City)
1	5	W. sebi clade 1	CBS818.96, Sweden, unknown
			CBS136843, The Netherlands, Hoornaar
			CBS196.56, The Netherlands, Groningen
			CBS110595, United Kingdom, Surrey
			CBS110620, United Kingdom, Surrey
2	1	W. sebi clade 1	DAOM226641, Canada, Ottawa
3	1	W. sebi clade 1	EXF8748, South Africa, Stellenbosch
4	2	W. sebi clade 1	CBS136841, Germany, Berlin
			CBS136847, The Netherlands, Ospel
5	1	W sebi clade 1	CBS136845, The Netherlands, Zutphen
6	1	W. sebi clade 2	CBS633.66, unknown, unknown
7	1	W. sebi clade 2	EXF8738, Uruguay, Montevideo
8	1	W. sebi clade 2	DAOM242694, Uruguay, Montevideo
9	1	W. sebi clade 2	DAOM242799, Uruguay, Montevideo
10	1	W. sebi clade 2	EXF8740, Micronesia, Malem
11	1	W. sebi clade 2	DAOM242695, Micronesia, Malem
12	5	W. sebi clade 2	EXF8741, Micronesia, Malem
			DAOM242696, Micronesia, Malem
			DAOM242800, Micronesia, Malem
			DAOM242697, Micronesia, Malem
			DAOM242702, Micronesia, Malem
13	6	W. sebi clade 2	EXF8745, Micronesia, Tofol
			DAOM242703, Micronesia, Tofol
			CBS136827, Germany, unknown
			CBS136837, The Netherlands, Amsterdam
			CBS136838, Germany, Stuttgart
			CBS112378, Germany, Stuttgart
14	1	W. sebi clade 2	DAOM242698, Uruguay, Montevideo
15	1	W. sebi clade 2	DAOM242699, Uruguay, Montevideo
16	4	W. sebi clade 2	DAOM242700, Indonesia, Yogyakarta
			DAOM242704, Indonesia, Yogyakarta
			CBS136836, The Netherlands, Rijswijk
			EXF8754, India, Varanasi
17	2	W. sebi clade 2	DAOM242701, Indonesia, Yogyakarta
			EXF8749, Thailand, MarkhamTia
18	2	W. sebi clade 2	EXF8747, Indonesia, Yogyakarta
			CBS136849, Thailand, Songkla
19	1	W. sebi clade 2	DAOM242705, Thailand, MarkhamTia
20	1	W. sebi clade 2	CBS136842, Germany, Stuttgart
21	1	W. sebi clade 2	EXF8757, Mexico, Sayulita
22	1	W. sebi clade 2	EXF8758, Mexico, Sayulita
23	1	W. sebi clade 2	EXF5918, Slovenia, Kamnik
24	3	W. sebi clade 3	DAOM226642, Canada, Ottawa
			DAOM242571, Canada, Ottawa
			DAOM242570, Canada, Ottawa
25	3	W. sebi clade 4	EXF8739, Uruguay, Montevideo
			EXF8746, Micronesia, Tofol
			EXF8744, Indonesia, Yogyakarta
26	27	W. muriae	CBS116628, Slovenia, unknown
			CBS136832, The Netherlands, Gorinchem
			CBS136834, The Netherlands, Einhoven
			CBS136835, The Netherlands, Einhoven
			CBS136840, Germany, Berlin
			CBS136844, The Netherlands, Zutphen
			EXF8591, Denmark, Lyngby
			EXF8590, Denmark, Lyngby
			EXF8588, Denmark, Lyngby
			EXF8586, Denmark, Lyngby
			EXF5916, Slovenia, Ljubljana
			EXF5915, Slovenia, Vrhnika
			EXF5914, Slovenia, Radomlje
			EXF8356, Slovenia, Lasko
			EXF8355, Slovenia, Lasko
			EXF8353, Slovenia, Lasko
			EXF8352, Slovenia, Lasko
			EXF8351, Slovenia, Lasko
			EXF8345, Slovenia, Radovljica
			EXF8344, Slovenia, Radovljica
			EXF8343, Slovenia, Radovljica
			EXF8342, Slovenia, Radovljica
			EXF8341, Slovenia, Radovljica
			EXF8327, Slovenia, Lasko
			EXF8315, Slovenia, Ljubljana
			EXF8313, Slovenia, Ljubljana
			EXF8299, Slovenia, Ljubljana
27	10	W. muriae	CBS136829, The Netherlands, Amsterdam
			CBS136830, The Netherlands, Tilburg
			CBS136831, The Netherlands, Tiel
			CBS136833, The Netherlands, Utrecht
			CBS136846, The Netherlands, Ospel
			CBS110624, United Kingdom, Surrey
			EXF8587, Denmark, Lyngby
			EXF5919, Slovenia, Kemnik
			EXF5917, Slovenia, Kemnik
			EXF8354, Slovenia, Lasko
28	2	W. muriae	CBS136839, Germany, Cologne
			EXF8314, Slovenia, Ljubljana
29	1	W. muriae	CBS110599, United Kingdom, Surrey
30	1	W. muriae	CBS136848, The Netherlands, Born
31	1	W. muriae	EXF8592, Denmark, Lyngby
