# Supplementary material for: Application of the Phylogenetic Species Concept to Wallemia sebi from House Dust and Indoor Air Revealed by Multi-Locus Genealogical Concordance
Source: PLoS One. 2015 Mar 23;10(3):e0120894. doi: 10.1371/journal.pone.0120894 (PMC4370657; doi:10.1371/journal.pone.0120894)
Supplement: S4 Table — Low or unsupported values are highlighted in yellow. (XLSX) [file pone.0120894.s004.xlsx]

## Sheet: Sheet1
Table S3. Support values for monophyly of each clade in our species hypothesis. Low or unsupported values are highlighted in yellow.
		Methods of phylogenetic reconstructiona
Clade	Gene	NJ	MP	ML	BI
W. sebi clade 1	ITS	96	yes	98	1
	MCM7	100	yes	87	1
	RPB1	90	yes	96	1
	RPB2	91	yes	51	1
	TSR1	100	yes	100	1
W. sebi clade 2	ITS	0	no	0	0
	MCM7	100	yes	95	1
	RPB1	100	yes	99	1
	RPB2	100	yes	89	1
	TSR1	100	yes	100	1
W. sebi clade 3	ITS	93	yes	87	1
	MCM7	100	yes	99	1
	RPB1	100	yes	100	1
	RPB2	100	yes	97	1
	TSR1	100	yes	100	1
W. sebi clade 4	ITS	80	yes	83	1
	MCM7	100	yes	100	1
	RPB1	100	yes	100	1
	RPB2	100	yes	100	1
	TSR1	100	yes	100	1
W. muriae	ITS	98	yes	100	1
	MCM7	100	yes	100	1
	RPB1	100	yes	100	1
	RPB2	100	yes	100	1
	TSR1	100	yes	100	1
a: NJ = neighbour joining. MP = Maximum parsimony strict consensus. ML = Maximum likelihood. BI = Bayesian inference
